# Supplementary material for: Deciphering genetic regulation of CD14 by SP1 through characterization of peripheral blood mononuclear transcriptome of P. faiciparum and P. vivax infected malaria patients
Source: PubMed Central journal article supplement — eBioMedicine. 2018 Oct 15;37:442–52. doi: 10.1016/j.ebiom.2018.09.049 (PMC6286629; doi:10.1016/j.ebiom.2018.09.049), 2018-10-15
Supplement: mmc1.pdf [file mmc1.pdf]

**Supplementary Table S1: Sequence and product size of the primers used in Real Time PCR, cloning and chromatin immunoprecipitation experiments**

FP: Forward primer, RP: Reverse primer, prom: CD14 promoter containing rs5744454 for ChIP assay

| Oligo Name                                       | Oligonucleotide (5'-3') sequences                                  | Product size |
|--------------------------------------------------|--------------------------------------------------------------------|--------------|
| Primers for quantitative PCR                     |                                                                    |              |
| CD14                                             | FP:AACTCCCTCAATCTGTCGTTTCG<br>RP:TCCAGTGTCAGGTTATCCACCT            | 146 bp       |
| PIK3CB                                           | FP:GTAATCGGAGGATAGGGCAGTT<br>RP:TGGCTCTGTTAACTTCACGGC              | 213 bp       |
| RELA                                             | FP:CCTTTTCGCAAGCTGATGTGCA<br>RP:CTGGCAGGTACTGGAATTCCAT             | 159 bp       |
| TRAM                                             | FP:AAGAGAAGCTCAAGGCCGAA<br>RP:TTGGCCCCTCTGTTGTATTGC                | 164 bp       |
| TLR8                                             | FP:GTCGACTACAGGAAGTTCCCC<br>RP:GGGTAAGTGGTTGTCTTCAAGCA             | 260 bp       |
| CD86                                             | FP:CCCAGACCACATTCCTTGGATT<br>RP:TCTGTTCACTCTCTTCCCTCTC             | 158 bp       |
| SP1                                              | FP:AGGTGGAGAGGAAGGAGAAAAC<br>RP:TACACTTCCCACAGCCTTGGATG            | 171 bp       |
| HLF                                              | FP:CATCCCTGGCCAGGAAATGTTT<br>RP:ATCTGGTTCTCTTTCAGCCTCC             | 201 bp       |
| Irf1                                             | FP:TCATGAAGCTCTTGGAGCAGTC<br>RP:CGCTGTAGACTCAGCCCAATAT             | 169 bp       |
| ACTB                                             | FP:GCGGGAAATCGTGCGTGACATT<br>RP:GATGGAGTTGAAGGTAGTTTCGTG           | 232 bp       |
| Primers for genotyping                           |                                                                    |              |
| rs2569191 and rs5744454                          | FP:GGGCTGTTGTAAATGCGTAGCT<br>RP:TGTGAACCTCATCTGTTGGCAC             | 768 bp       |
| rs2569190                                        | FP:CTAAGGCACTGAGGATCATCCT<br>RP:TCCTGGGATGTCATTTCAGTTCC            | 278 bp       |
| Primers for promoter cloning                     |                                                                    |              |
| CD14_rs5744454_cloning                           | FP:GAGGGTACCACTTGGCCAATGTGTCTCT<br>RP:ATCCTCGAGTCCTGCCACCAAATCCAAG | 560 bp       |
| Primers for chromatin immune precipitation assay |                                                                    |              |
| ChIP_SP1_CD14prom                                | FP:GCTCACGCCTGTAATCCCA<br>RP:GTAGCTGGGATTACAAGTGC                  | 159 bp       |
| SP1_positive                                     | FP:AACCCTAGATGCCCTGCAGAATC<br>RP:GGATGTCATTTCAGTTCCCTCCT           | 154bp        |
| SP1_negative                                     | FP:TCCACCCAAACTGTATTTTCAGAC<br>RP:TGCCCTTAGGTCTCCAGTTT             | 146 bp       |

**Supplementary Table S2a: Genes differentially regulated between *P. falciparum* (F) versus *P. vivax* (V) infection.**

| <b>Genes up regulated in <i>P.falciparum</i> (F)</b> | <b>FC&gt;2</b> | <b>P value</b> | <b>FDR corrected P value</b> |
|------------------------------------------------------|----------------|----------------|------------------------------|
| AASDHPPT                                             | 2.061936638    | 3.00E-05       | 0.023374                     |
| ABCC4                                                | 2.626242251    | 0.00015        | 0.023532                     |
| ABHD3                                                | 2.279946545    | 0.00292        | 0.047867                     |
| ACAP2                                                | 3.789480282    | 0.00018        | 0.023374                     |
| ACRBP                                                | 6.597868389    | 0.00101        | 0.030786                     |
| ADAT1                                                | 2.302178983    | 3.00E-05       | 0.023374                     |
| AGPAT1                                               | 4.493999612    | 0.00205        | 0.04126                      |
| AGTRAP                                               | 3.794737261    | 0.00092        | 0.029752                     |
| ALDH1A1                                              | 2.650014034    | 6.00E-05       | 0.023374                     |
| ANKRD9                                               | 2.056227653    | 0.00077        | 0.028967                     |
| AP3S1                                                | 2.62988552     | 0.00156        | 0.036377                     |
| APOBEC3F                                             | 2.909961367    | 0.00131        | 0.034403                     |
| APP                                                  | 4.707626949    | 0.00043        | 0.025216                     |
| ARHGEF11                                             | 2.414961183    | 0.00306        | 0.048798                     |
| ARL6IP6                                              | 2.295804828    | 0.00054        | 0.026266                     |
| ARMCX6                                               | 3.885229982    | 0.00132        | 0.034642                     |
| ARPC3                                                | 3.184352395    | 8.00E-04       | 0.028967                     |
| ASAH1                                                | 2.228387302    | 0.00158        | 0.036576                     |
| ASAP1                                                | 2.219138944    | 0.0029         | 0.047723                     |
| ASB8                                                 | 2.033549347    | 0.00012        | 0.023374                     |
| ATG3                                                 | 2.103803558    | 0.00288        | 0.047723                     |
| ATP5F1                                               | 4.193049902    | 0.00316        | 0.049436                     |
| ATP6V0C                                              | 4.392371255    | 0.00137        | 0.034951                     |
| ATP6V0E1                                             | 2.899893666    | 6.00E-04       | 0.026926                     |
| BCL2L1                                               | 2.229932437    | 0.00094        | 0.030288                     |
| BID                                                  | 2.716972569    | 0.00227        | 0.043208                     |
| BNIP3L                                               | 3.328794939    | 0.00281        | 0.047301                     |
| BRSK1                                                | 3.244508622    | 0.0027         | 0.046297                     |
| BTN3A3                                               | 2.406606052    | 0.00135        | 0.034785                     |
| C10orf26                                             | 3.38228915     | 0.00052        | 0.02609                      |
| C12orf76                                             | 4.365055508    | 0.0025         | 0.044589                     |
| C14orf43                                             | 2.370185542    | 0.0019         | 0.039601                     |
| C17orf60                                             | 2.834314793    | 0.00043        | 0.025216                     |
| C17orf95                                             | 2.069095163    | 0.00222        | 0.04258                      |
| C20orf55                                             | 2.060507907    | 0.00125        | 0.033977                     |
| C3orf38                                              | 2.865923301    | 0.00046        | 0.02529                      |
| C4orf18                                              | 5.230685394    | 8.00E-05       | 0.023374                     |
| C6orf211                                             | 2.20992897     | 0.00162        | 0.036999                     |

|         |             |          |          |
|---------|-------------|----------|----------|
| CA2     | 3.525920632 | 1.00E-05 | 0.019709 |
| CALD1   | 3.142690067 | 0.00291  | 0.04786  |
| CANT1   | 2.276788058 | 0.00248  | 0.044589 |
| CAT     | 2.528006197 | 0.00274  | 0.046613 |
| CCDC97  | 2.308570835 | 0.00182  | 0.038962 |
| CCNC    | 2.200757219 | 0.00059  | 0.026926 |
| CCNDBP1 | 2.500124605 | 0.00067  | 0.027813 |
| CCR2    | 2.202283196 | 0.00298  | 0.048416 |
| CCRL2   | 2.236123702 | 0.00035  | 0.024123 |
| CD14    | 2.857988279 | 0.00287  | 0.047714 |
| CD302   | 6.320330495 | 0.00082  | 0.029004 |
| CD36    | 2.011121161 | 0.00027  | 0.023374 |
| CD44    | 6.993428963 | 0.00313  | 0.049224 |
| CD46    | 2.469125214 | 7.00E-05 | 0.023374 |
| CD86    | 5.684368173 | 0.00043  | 0.025216 |
| CD9     | 2.751083636 | 0.00299  | 0.048447 |
| CDC14B  | 3.179941004 | 0.00274  | 0.046679 |
| CENTB2  | 3.262549973 | 0.00019  | 0.023374 |
| CETP    | 2.852051435 | 0.00233  | 0.043643 |
| CHMP1B  | 2.089271526 | 0.00071  | 0.028439 |
| CHMP5   | 4.135322945 | 0.00262  | 0.045605 |
| CHPF2   | 2.217601287 | 0.00072  | 0.028439 |
| CHPT1   | 2.314980434 | 0.00073  | 0.028439 |
| CIAO1   | 2.287861946 | 0.00023  | 0.023374 |
| CLEC4A  | 2.930201749 | 0.00175  | 0.038415 |
| CLINT1  | 3.002158195 | 0.00181  | 0.038962 |
| CLIP4   | 2.032140286 | 0.00048  | 0.025473 |
| CMTM5   | 5.41889991  | 0.00026  | 0.023374 |
| CMTM6   | 2.995921869 | 0.00063  | 0.027271 |
| CNBP    | 4.441355335 | 6.00E-05 | 0.023374 |
| CNIH    | 3.368251814 | 0.00032  | 0.023374 |
| CNOT7   | 3.74508899  | 0.00116  | 0.032776 |
| COMT    | 2.430073584 | 0.00044  | 0.025216 |
| CORO1B  | 3.73471978  | 0.00136  | 0.034916 |
| CREG1   | 2.253238457 | 0.00028  | 0.023374 |
| CRK     | 3.847709819 | 0.00043  | 0.025216 |
| CRTAP   | 4.152557082 | 0.001    | 0.030762 |
| CSF2RA  | 3.182145935 | 0.00039  | 0.024464 |
| CTCF    | 2.095072254 | 0.00015  | 0.023374 |
| CTR9    | 2.118436669 | 0.00065  | 0.02738  |
| CTTN    | 4.863517133 | 1.00E-04 | 0.023374 |

|                |             |          |          |
|----------------|-------------|----------|----------|
| CUTL1          | 2.237674202 | 0.00248  | 0.044589 |
| CXCL5          | 2.167451934 | 0.00027  | 0.023374 |
| CYB5R3         | 4.198866734 | 1.00E-04 | 0.023374 |
| CYB5R4         | 2.246999806 | 0.00052  | 0.026106 |
| CYP27A1        | 2.950582914 | 0.00055  | 0.026379 |
| DAPK1          | 2.528006197 | 0.0024   | 0.044176 |
| DCK            | 2.637187229 | 0.00078  | 0.028967 |
| DDX60          | 3.112340706 | 0.00038  | 0.024464 |
| DICER1         | 2.832350876 | 0.00241  | 0.044176 |
| DKFZp686I15217 | 2.435132037 | 0.00089  | 0.029516 |
| DNAJB12        | 2.443586203 | 0.00229  | 0.043359 |
| DNAJB6         | 4.28709385  | 4.00E-04 | 0.024464 |
| DNASE1L1       | 4.890561111 | 2.00E-04 | 0.023374 |
| DR1            | 2.191623533 | 0.00063  | 0.02734  |
| DUSP22         | 2.993845974 | 0.00053  | 0.026243 |
| DUSP6          | 3.815838202 | 0.00243  | 0.044346 |
| DYNLRB1        | 3.441410522 | 0.00229  | 0.043266 |
| EID2           | 2.661058082 | 0.00202  | 0.040926 |
| EIF3J          | 2.153972752 | 0.00021  | 0.023374 |
| EIF4E3         | 2.865923301 | 0.00202  | 0.040911 |
| EIF4G2         | 2.196185628 | 0.00239  | 0.044026 |
| ELMO2          | 2.142061646 | 0.00173  | 0.038018 |
| ENG            | 3.789480282 | 0.00017  | 0.023374 |
| EP300          | 4.245692836 | 0.00153  | 0.035993 |
| ESD            | 2.208397694 | 0.00162  | 0.036901 |
| EVI2A          | 2.122846418 | 0.00164  | 0.037081 |
| EXOSC1         | 2.493202389 | 0.00045  | 0.02529  |
| F13A1          | 7.115671948 | 1.00E-04 | 0.023374 |
| FAM18B         | 2.463996147 | 0.00311  | 0.049008 |
| FAM20C         | 3.354272738 | 0.00128  | 0.034046 |
| FBXL5          | 4.588428097 | 0.00073  | 0.028439 |
| FBXO7          | 2.084931522 | 0.00316  | 0.049464 |
| FCGR2A         | 2.871889021 | 0.00012  | 0.023374 |
| FHL3           | 3.50399326  | 0.00147  | 0.03551  |
| FKSG30         | 7.200015438 | 0.00066  | 0.027485 |
| FNTA           | 2.529759085 | 9.00E-04 | 0.029671 |
| FPR1           | 3.660396673 | 0.00013  | 0.023374 |
| FPR2           | 3.276146791 | 0.00038  | 0.024464 |
| FRAT1          | 3.056753042 | 0.00046  | 0.02529  |
| FTHL12         | 3.30351066  | 0.00025  | 0.023374 |
| FXVD5          | 2.278366754 | 0.00086  | 0.029406 |

|            |             |          |          |
|------------|-------------|----------|----------|
| G3BP2      | 2.940374673 | 0.00257  | 0.045313 |
| GALNT4     | 2.826467288 | 0.00222  | 0.04259  |
| GAPT       | 3.010493495 | 0.00228  | 0.043266 |
| GAS2L1     | 4.410676652 | 0.00103  | 0.031327 |
| GFIIB      | 2.617156143 | 0.00144  | 0.035283 |
| GIMAP2     | 2.148008943 | 0.00244  | 0.044393 |
| GLRX2      | 2.295804828 | 0.00117  | 0.032839 |
| GNA13      | 2.639015822 | 0.00142  | 0.035178 |
| GNG10      | 4.343927425 | 0.00061  | 0.027069 |
| GNG11      | 3.74508899  | 0.0029   | 0.047723 |
| GNG2       | 3.592529492 | 0.00221  | 0.042555 |
| GPSM3      | 2.535025044 | 0.00022  | 0.023374 |
| GPX1       | 3.246758324 | 1.00E-06 | 0.010618 |
| GPX4       | 4.737086447 | 0.0031   | 0.049008 |
| GSTM1      | 4.041805786 | 0.00171  | 0.038015 |
| GUCY1A3    | 3.168939244 | 9.00E-05 | 0.023374 |
| H2AFY      | 4.036206535 | 0.00153  | 0.036018 |
| HCCS       | 2.441893025 | 0.00164  | 0.03708  |
| HIATL1     | 3.182145935 | 0.00204  | 0.041193 |
| HIGD1A     | 2.125791349 | 0.00022  | 0.023374 |
| HIST1H2AC  | 7.889861636 | 0.00304  | 0.04868  |
| HIST1H2AG  | 2.791421528 | 0.00014  | 0.023374 |
| HIST1H2BD  | 4.069918768 | 0.00235  | 0.043751 |
| HIST1H2BJ  | 5.045509635 | 3.00E-05 | 0.023374 |
| HIST1H2BK  | 6.783359717 | 7.00E-05 | 0.023374 |
| HIST1H3H   | 6.435266968 | 5.00E-05 | 0.023374 |
| HIST1H4H   | 3.080148697 | 0.00258  | 0.045389 |
| HIST2H2AA3 | 9.259921736 | 7.00E-04 | 0.028212 |
| HIST2H2AA4 | 3.138336392 | 0.00014  | 0.023374 |
| HIST2H2BE  | 3.567714078 | 0.00178  | 0.038738 |
| HIST2H4B   | 2.042024251 | 0.00111  | 0.032178 |
| HK2        | 3.168939244 | 0.00141  | 0.035178 |
| TNFAIP8L2  | 10.09801626 | 0.00161  | 0.036807 |
| HLA-DRB6   | 3.879847641 | 0.0011   | 0.032178 |
| HN1        | 2.688869988 | 0.00051  | 0.02609  |
| HNRNPH2    | 4.500233939 | 0.00177  | 0.038686 |
| HNRNPK     | 7.490177979 | 0.00011  | 0.023374 |
| HNRPK      | 2.622604028 | 0.00046  | 0.025399 |
| HOMER2     | 2.239225777 | 0.00056  | 0.02675  |
| HPS3       | 2.237674202 | 0.00018  | 0.023374 |
| HSD17B11   | 3.460546762 | 0.0025   | 0.044589 |

|          |             |          |          |
|----------|-------------|----------|----------|
| HVCN1    | 3.853047576 | 0.00084  | 0.029205 |
| IDH1     | 2.314980434 | 0.00053  | 0.026243 |
| IER5     | 3.600007719 | 0.00028  | 0.023374 |
| IGFBP7   | 2.428389769 | 0.00084  | 0.029283 |
| CX3CR1   | 4.694592713 | 0.00041  | 0.024823 |
| IL8RBP   | 5.123039445 | 1.00E-05 | 0.019709 |
| INF2     | 3.683302789 | 0.00025  | 0.023374 |
| IRF2BP2  | 2.575763259 | 0.00103  | 0.031314 |
| IRF8     | 2.294214048 | 0.00233  | 0.043643 |
| ISCA1    | 2.716972569 | 0.00243  | 0.044346 |
| ITGA2B   | 9.740528149 | 0.00012  | 0.023374 |
| ITGB1    | 2.508804409 | 0.00099  | 0.030755 |
| ITGB3    | 3.742493991 | 0.00031  | 0.023374 |
| ITGB5    | 3.213175987 | 0.00013  | 0.023374 |
| ITM2B    | 2.039195366 | 1.00E-04 | 0.023374 |
| JAK1     | 3.417638964 | 0.00119  | 0.033069 |
| JMJD1C   | 2.774061938 | 0.00044  | 0.025264 |
| KEAP1    | 2.254800824 | 0.0019   | 0.039601 |
| KIAA0261 | 2.470837274 | 0.00043  | 0.025216 |
| KLHL6    | 2.069095163 | 0.00282  | 0.047308 |
| LACTB    | 2.264197804 | 3.00E-05 | 0.023374 |
| LAIR1    | 2.81864151  | 0.00188  | 0.039475 |
| LCP2     | 2.071965527 | 3.00E-05 | 0.023374 |
| LILRA1   | 2.540301965 | 0.00031  | 0.023374 |
| LIMS1    | 3.110184144 | 0.00142  | 0.035178 |
| LRRC8D   | 2.602683711 | 0.00288  | 0.047723 |
| LYPLAL1  | 2.373473595 | 0.00056  | 0.026754 |
| LYST     | 2.216064696 | 0.00221  | 0.042555 |
| MBD2     | 2.059080167 | 8.00E-05 | 0.023374 |
| MGLL     | 3.063115994 | 0.00306  | 0.048798 |
| MGST1    | 2.67585511  | 0.00036  | 0.024199 |
| MID1IP1  | 3.082284433 | 0.00026  | 0.023374 |
| MIR1974  | 3.797368484 | 0.00099  | 0.030755 |
| MIR1978  | 2.203810232 | 0.00063  | 0.027374 |
| MLKL     | 2.145033234 | 0.00056  | 0.026777 |
| MLL      | 2.642676811 | 0.00088  | 0.029497 |
| MLX      | 3.142690067 | 0.00151  | 0.035829 |
| MD1IP1   | 3.082284433 | 0.00213  | 0.041737 |
| MNDA     | 3.805273105 | 0.00145  | 0.035338 |
| MORF4L2  | 3.222097164 | 0.00024  | 0.023374 |
| MRPS33   | 2.07915887  | 0.00163  | 0.036999 |

|          |             |          |          |
|----------|-------------|----------|----------|
| MS4A7    | 4.005549023 | 0.00123  | 0.033578 |
| MSL3     | 2.039195366 | 0.00125  | 0.033792 |
| MTMR12   | 2.20686748  | 0.00108  | 0.032053 |
| MTPN     | 2.428389769 | 0.00122  | 0.033527 |
| MTSS1    | 3.474968741 | 0.00145  | 0.035283 |
| MYD88    | 2.406606052 | 7.00E-05 | 0.023374 |
| MYL9     | 7.285358669 | 0.00323  | 0.049956 |
| MYLK     | 2.916018758 | 0.00019  | 0.023374 |
| NAAA     | 2.418311352 | 0.00128  | 0.034029 |
| NAP1L1   | 2.131693472 | 0.00233  | 0.043643 |
| NBN      | 2.20686748  | 0.00104  | 0.031347 |
| NCF1C    | 9.343739157 | 0.0032   | 0.049727 |
| NDUFAF3  | 5.024569525 | 0.00046  | 0.02529  |
| NOTCH2NL | 3.424753138 | 0.00065  | 0.02738  |
| NRGN     | 5.795768618 | 0.00114  | 0.032628 |
| NUDT21   | 2.061936638 | 0.00284  | 0.047495 |
| NUP153   | 2.777910272 | 0.00054  | 0.026243 |
| OAS1     | 6.520578659 | 0.00014  | 0.023374 |
| OAS2     | 3.47256091  | 0.00266  | 0.045856 |
| OGFRL1   | 2.099433367 | 0.00019  | 0.023374 |
| OPN3     | 2.617156143 | 7.00E-05 | 0.023374 |
| OTUD4    | 2.441893025 | 0.00073  | 0.028439 |
| P2RY13   | 2.661058082 | 0.0017   | 0.037932 |
| P704P    | 3.683302789 | 0.00092  | 0.029752 |
| PABPC3   | 2.291035796 | 0.00308  | 0.048925 |
| PAIP2    | 2.050534476 | 0.00316  | 0.049436 |
| PARVB    | 2.096524951 | 0.00013  | 0.023374 |
| PECAM1   | 2.366902044 | 0.00037  | 0.024199 |
| PECI     | 2.331082396 | 0.00159  | 0.036586 |
| PF4V1    | 3.839717044 | 0.00062  | 0.027214 |
| PGCP     | 2.438510188 | 0.0024   | 0.044135 |
| PICALM   | 2.127265346 | 0.00133  | 0.034679 |
| PIGP     | 2.15995312  | 0.00212  | 0.041737 |
| PIK3C2A  | 2.177994031 | 0.00047  | 0.025427 |
| PIK3CB   | 2.114036081 | 0.00238  | 0.043977 |
| PIK3R4   | 2.142061646 | 0.00221  | 0.042563 |
| PILRA    | 4.030615042 | 0.00043  | 0.025216 |
| PIP4K2A  | 2.149498346 | 0.00157  | 0.036575 |
| PLAUR    | 3.647732662 | 0.00087  | 0.029464 |
| PLDN     | 2.455471368 | 0.00228  | 0.043266 |
| PLSCR1   | 2.086377187 | 0.0029   | 0.047723 |

|         |             |          |          |
|---------|-------------|----------|----------|
| PNMA1   | 2.305372694 | 0.00088  | 0.029497 |
| POR     | 2.112571251 | 0.00114  | 0.032628 |
| PPBP    | 3.184352395 | 0.00192  | 0.039801 |
| PPP1R10 | 2.411615655 | 0.00126  | 0.034029 |
| PPPDE2  | 3.249009585 | 0.00016  | 0.023374 |
| PRDX3   | 3.630076621 | 0.00028  | 0.023374 |
| PRKAR1A | 2.445280555 | 0.00072  | 0.028439 |
| PRKCB   | 4.112455307 | 0.00175  | 0.038415 |
| PRKCB1  | 4.005549023 | 0.00299  | 0.04843  |
| PRNP    | 4.81988926  | 0.00016  | 0.023374 |
| PSEN1   | 2.176484883 | 0.00098  | 0.030642 |
| PSMA1   | 2.830388321 | 0.00107  | 0.031952 |
| PSMC6   | 2.122846418 | 0.00026  | 0.023374 |
| PSMD10  | 2.975227525 | 0.00302  | 0.0486   |
| PTGER2  | 2.181015465 | 0.00247  | 0.044589 |
| PTGIR   | 2.316585612 | 0.00212  | 0.041737 |
| PTGS1   | 2.707572558 | 0.0018   | 0.03893  |
| PTPN12  | 2.626242251 | 0.00068  | 0.027969 |
| PTTG1IP | 5.344296314 | 0.00012  | 0.023374 |
| P38     | 3.847710023 | 0.00163  | 0.037013 |
| PURA    | 2.331082396 | 8.00E-04 | 0.028967 |
| QPCT    | 2.475980582 | 0.00045  | 0.02529  |
| RAB37   | 2.561519723 | 0.00045  | 0.02529  |
| RAB4A   | 2.484576564 | 0.00199  | 0.040677 |
| RASSF2  | 2.270484204 | 0.00135  | 0.034785 |
| RBBP5   | 2.840214717 | 0.00027  | 0.023374 |
| RDH14   | 2.595477534 | 0.00015  | 0.023374 |
| RELA    | 4.204691636 | 0.00032  | 0.023374 |
| RFFL    | 2.958775018 | 0.00022  | 0.023374 |
| RGS10   | 5.747760706 | 5.00E-05 | 0.023374 |
| RHOT1   | 2.302178983 | 0.00052  | 0.02609  |
| RIOK3   | 2.672148157 | 4.00E-04 | 0.024464 |
| RNASE4  | 2.375119332 | 0.00168  | 0.037656 |
| RNF13   | 2.089271526 | 8.00E-04 | 0.028967 |
| RNF145  | 2.246999806 | 0.00049  | 0.025591 |
| RNF146  | 2.457173961 | 0.00212  | 0.041737 |
| RNF5P1  | 3.660396673 | 0.00048  | 0.025473 |
| RNH1    | 3.271608234 | 6.00E-04 | 0.026926 |
| RP2     | 3.853047576 | 0.00222  | 0.042597 |
| RPS15A  | 4.793236085 | 3.00E-05 | 0.023374 |
| RPS4X   | 3.652793    | 0.00213  | 0.041737 |



|                |             |          |          |
|----------------|-------------|----------|----------|
| RTN2           | 2.187070915 | 5.00E-04 | 0.025795 |
| S1PR3          | 2.559744828 | 2.00E-05 | 0.023374 |
| SDCBP          | 3.044066762 | 0.00148  | 0.035578 |
| SH2D3C         | 3.805273105 | 0.00049  | 0.025473 |
| SH3BGRL        | 2.057653416 | 0.00011  | 0.023374 |
| SHOC2          | 2.006943497 | 0.00306  | 0.048798 |
| SKAP2          | 2.726405215 | 0.00018  | 0.023374 |
| SLAMF6         | 2.642676811 | 0.00055  | 0.026521 |
| SLC24A4        | 2.797232165 | 0.00073  | 0.028439 |
| SLC45A3        | 2.197708435 | 0.0014   | 0.035162 |
| SLCO3A1        | 2           | 0.00083  | 0.0291   |
| SNCA           | 4.169863043 | 0.0015   | 0.035602 |
| SNURF          | 2.403272099 | 0.00029  | 0.023374 |
| SORL1          | 3.538161741 | 0.00028  | 0.023374 |
| SPG21          | 3.893317497 | 0.00032  | 0.023374 |
| SPINT1         | 2.217601287 | 0.00205  | 0.041257 |
| SPTLC2         | 2.404938498 | 0.00161  | 0.036807 |
| SRGN           | 4.380209883 | 0.00023  | 0.023374 |
| SRP9           | 2.066228775 | 0.00123  | 0.033578 |
| STAG2          | 2.503592917 | 0.00036  | 0.024174 |
| STAMBP         | 2.298989696 | 0.00198  | 0.040589 |
| STARD3NL       | 2.103803558 | 0.00211  | 0.041711 |
| STAT3          | 3.07801444  | 4.00E-04 | 0.024546 |
| STRN4          | 2.064797071 | 0.00135  | 0.034785 |
| STXBP3         | 2.450370664 | 0.00221  | 0.042555 |
| SUMO2          | 3.405814831 | 0.00105  | 0.031523 |
| SYPL1          | 2.251677172 | 0.00149  | 0.035578 |
| TAF12          | 2.0907202   | 0.00182  | 0.038962 |
| TAF2           | 2.339175328 | 0.00196  | 0.040422 |
| TBL1XR1        | 2.153972752 | 0.00064  | 0.02738  |
| TBL2           | 2.394957409 | 0.0013   | 0.034335 |
| TICAM1 (TRIF)  | 2.177994031 | 1.00E-04 | 0.023374 |
| TIMP2          | 4.826575679 | 0.00029  | 0.023374 |
| TLR10          | 3.014669819 | 0.00053  | 0.026243 |
| TLR6           | 3.120981921 | 0.00025  | 0.023374 |
| TLR8           | 2.380063393 | 0.00086  | 0.029406 |
| TMED10         | 4.138190326 | 0.00261  | 0.04549  |
| TMED7 (TRAM)   | 2.337554497 | 0.00022  | 0.023374 |
| TMEM123        | 3.737309388 | 0.001    | 0.030786 |
| TMEM189-UBE2V1 | 2.639015822 | 0.00238  | 0.043953 |
| TMEM19         | 2.8108374   | 2.00E-04 | 0.023374 |

|          |             |          |          |
|----------|-------------|----------|----------|
| TMEM63A  | 2.938337267 | 0.00107  | 0.031857 |
| TMEM69   | 2.391639594 | 0.00314  | 0.049234 |
| TNFSF13B | 2.034959384 | 0.00171  | 0.037969 |
| TNPO1    | 2.032140286 | 1.00E-04 | 0.019718 |
| TPM1     | 3.434261746 | 0.00237  | 0.043944 |
| TRAPPC2  | 2.106722072 | 2.00E-05 | 0.023374 |
| TRIM22   | 4.166973716 | 0.00017  | 0.023374 |
| TRIM27   | 2.777910272 | 0.00044  | 0.025216 |
| TRIM5    | 3.251262408 | 0.00201  | 0.040803 |
| TRIM58   | 3.73471978  | 0.00108  | 0.032053 |
| TRMT112  | 2.37676621  | 0.00218  | 0.04237  |
| TSC22D1  | 3.046177479 | 0.00077  | 0.028967 |
| TSC22D2  | 2.445280555 | 0.00022  | 0.023374 |
| TSPYL1   | 2.470837274 | 1.00E-04 | 0.019718 |
| TTC9C    | 2.095072254 | 0.00173  | 0.038063 |
| TYROBP   | 3.845043714 | 0.00021  | 0.023374 |
| UBA3     | 2.783692784 | 0.00134  | 0.034785 |
| UBB      | 5.95045505  | 6.00E-05 | 0.023374 |
| UBC      | 3.249009585 | 0.00036  | 0.024174 |
| UBE2E1   | 2.121375483 | 0.00247  | 0.044538 |
| UNC84A   | 2.462288827 | 0.0025   | 0.044589 |
| USP21    | 2.781763943 | 0.00134  | 0.034785 |
| UTP14A   | 2.408274762 | 1.00E-04 | 0.019718 |
| VCL      | 5.528928826 | 0.00147  | 0.03551  |
| VNN2     | 3.885229982 | 0.00013  | 0.023374 |
| VPS28    | 3.750284386 | 0.00078  | 0.028967 |
| WASPIP   | 2.220677667 | 0.00216  | 0.042248 |
| XK       | 3.099423724 | 0.00228  | 0.043266 |
| YPEL2    | 3.69609029  | 0.00276  | 0.046695 |
| YWHAB    | 3.716642697 | 1.00E-04 | 0.023374 |
| YWHAG    | 2.262628926 | 0.00186  | 0.039185 |
| ZC3H15   | 2.049113646 | 0.00078  | 0.028967 |
| ZCCHC8   | 2.234574276 | 0.00068  | 0.027937 |
| ZFP106   | 2.64450921  | 0.00081  | 0.028967 |
| ZMAT3    | 4.569384987 | 0.00319  | 0.049612 |
| ZNF131   | 2.226843236 | 0.00109  | 0.032178 |
| ZNF217   | 2.440201021 | 0.00088  | 0.029497 |

| <b>Genes down regulated in <i>P.falciparum</i> (F)</b> | <b>FC &lt;-2 (in -ve)</b> | <b>P value</b> | <b>FDR corrected P value</b> |
|--------------------------------------------------------|---------------------------|----------------|------------------------------|
| ADAM17                                                 | 2.203810232               | 0.00089        | 0.029497                     |
| AGAP8                                                  | 2.709449955               | 0.00068        | 0.027969                     |
| AIRE                                                   | 2.015307521               | 0.00159        | 0.036586                     |
| AK2P2                                                  | 2.20686748                | 0.00091        | 0.029719                     |
| AKR1D1                                                 | 2.167451934               | 0.00139        | 0.035162                     |
| ALDH8A1                                                | 2.109644634               | 0.00023        | 0.023374                     |
| ALPP                                                   | 3.386981249               | 0.00013        | 0.023374                     |
| ALS2CR14                                               | 3.016760153               | 6.00E-05       | 0.023374                     |
| ANKMY1                                                 | 2.275210456               | 6.00E-04       | 0.026926                     |
| ANKRD13D                                               | 3.925836255               | 0.00039        | 0.024464                     |
| ANKRD30B                                               | 2.103803558               | 3.00E-04       | 0.023374                     |
| ANKRD44                                                | 2.803054898               | 0.00086        | 0.029406                     |
| AP3M2                                                  | 2.436820527               | 0.00022        | 0.023374                     |
| ARL16                                                  | 2.863937482               | 0.00052        | 0.02609                      |
| ARL17P1                                                | 2.074839873               | 0.00033        | 0.023374                     |
| ASB1                                                   | 2.443586203               | 0.00121        | 0.033322                     |
| ASB16                                                  | 2.899893666               | 0.00016        | 0.023374                     |
| ASL                                                    | 2.15546629                | 0.00234        | 0.043643                     |
| ATG10                                                  | 2.666597354               | 0.00057        | 0.026865                     |
| ATG12                                                  | 2.45206972                | 0.00037        | 0.024347                     |
| ATRIP                                                  | 2.145033234               | 3.00E-04       | 0.023374                     |
| BCYRN1                                                 | 2.4794154                 | 8.00E-04       | 0.028967                     |
| BLZF1                                                  | 2.758721844               | 0.00012        | 0.023374                     |
| BMP8B                                                  | 2.928171392               | 0.00031        | 0.023374                     |
| BOLA2                                                  | 2.171963713               | 0.00178        | 0.038701                     |
| C11orf17                                               | 2.109644634               | 0.00091        | 0.029719                     |
| C11orf63                                               | 2.606294299               | 0.00063        | 0.027374                     |
| C11orf80                                               | 2.121375483               | 0.00059        | 0.026926                     |
| C14orf80                                               | 2.526254524               | 0.00108        | 0.03203                      |
| C14orf82                                               | 2.570412675               | 7.00E-05       | 0.023374                     |
| C15orf63                                               | 2.764464413               | 0.00047        | 0.025473                     |
| C16orf93                                               | 2.286276671               | 0.00296        | 0.048261                     |
| C19orf48                                               | 2.431758566               | 0.00131        | 0.034423                     |
| C19orf66                                               | 2.069095163               | 0.00091        | 0.029719                     |
| C21orf2                                                | 2.134650676               | 0.00039        | 0.024464                     |
| C21orf24                                               | 2.121375483               | 0.00122        | 0.033527                     |
| C21orf55                                               | 2.366902044               | 0.00065        | 0.027423                     |
| C21orf58                                               | 2.71508996                | 0.00032        | 0.023374                     |
| C2orf69                                                | 2.873880353               | 0.00054        | 0.026243                     |
| C3orf50                                                | 2.046274939               | 0.00115        | 0.032707                     |

|          |             |          |          |
|----------|-------------|----------|----------|
| C5orf28  | 3.441410522 | 0.00075  | 0.028874 |
| C6orf170 | 3.729545946 | 1.00E-05 | 0.013363 |
| C7orf54  | 3.351948539 | 0.00028  | 0.023374 |
| C8orf37  | 2.394957409 | 0.00119  | 0.033011 |
| C8orf45  | 2.66474965  | 1.00E-04 | 0.023374 |
| C9orf130 | 2.703821666 | 0.00051  | 0.02595  |
| C9orf37  | 2.339175328 | 0.00058  | 0.026926 |
| C9orf80  | 2.962879596 | 4.00E-04 | 0.024464 |
| CACYBP   | 2.709449955 | 0.00018  | 0.023374 |
| CAPS     | 2.121375483 | 0.00067  | 0.027893 |
| CARD11   | 2.0363704   | 0.00027  | 0.023374 |
| CCBE1    | 3.439025945 | 7.00E-05 | 0.023374 |
| CCDC125  | 2.600880293 | 0.00075  | 0.028967 |
| CCDC84   | 2.0139111   | 0.00301  | 0.048519 |
| CCNE1    | 2.043440165 | 0.00017  | 0.023374 |
| CDAN1    | 2.481134595 | 0.00013  | 0.023374 |
| CDC14A   | 2.140577397 | 0.00043  | 0.025216 |
| CDK10    | 2.292624371 | 0.00058  | 0.026926 |
| CEP27    | 2.529759085 | 0.00032  | 0.023374 |
| CHAF1A   | 2.278366754 | 0.00045  | 0.02529  |
| CLDND2   | 2.034959384 | 0.00026  | 0.023374 |
| COX19    | 2.566851795 | 0.00085  | 0.029401 |
| CPSF1    | 2.122846418 | 0.00111  | 0.032178 |
| CRCP     | 2.834314793 | 2.00E-04 | 0.023374 |
| CREB1    | 2.754900093 | 0.00028  | 0.023374 |
| CRYZL1   | 2.082043195 | 0.00081  | 0.028967 |
| CSNK1E   | 2.10000232  | 0.00214  | 0.041886 |
| CTAGE5   | 2.45206972  | 0.00081  | 0.028967 |
| CTGLF3   | 2.822551687 | 7.00E-05 | 0.023374 |
| CYCSL1   | 3.184352395 | 0.001    | 0.030786 |
| D2HGDH   | 2.191623533 | 0.00128  | 0.034029 |
| DCLRE1C  | 2.679567205 | 3.00E-05 | 0.023374 |
| DDB1     | 2.032140286 | 0.00295  | 0.048071 |
| DDX17    | 2.158456473 | 0.00089  | 0.029497 |
| DDX19A   | 2.057653416 | 0.00021  | 0.023374 |
| DDX51    | 2.918040688 | 0.00032  | 0.023374 |
| DDX6     | 2.591881931 | 0.00069  | 0.028197 |
| DENND4C  | 2.121375483 | 0.00287  | 0.047723 |
| DENR     | 3.51128719  | 5.00E-05 | 0.023374 |
| DHRS13   | 2.049113646 | 7.00E-05 | 0.023374 |
| DIDO1    | 2.193143177 | 0.00088  | 0.029497 |

|              |             |          |          |
|--------------|-------------|----------|----------|
| DKFZp434K191 | 2.622604028 | 0.0021   | 0.041572 |
| DMC1         | 3.1058755   | 1.00E-04 | 0.023374 |
| DNAH1        | 2.185555478 | 0.00117  | 0.032904 |
| DPP7         | 2.029325093 | 0.00076  | 0.028967 |
| DTWD2        | 3.027233586 | 0.00072  | 0.028439 |
| DUT          | 2.334316204 | 0.00111  | 0.032178 |
| DUXAP3       | 3.271608234 | 1.00E-04 | 0.023374 |
| EIF2AK4      | 2.609909895 | 0.00039  | 0.024464 |
| ENO3         | 2.080600533 | 0.00064  | 0.02738  |
| ERGIC1       | 2.514026749 | 0.00048  | 0.025473 |
| ERI3         | 2.029325093 | 0.00064  | 0.02738  |
| EVI5         | 2.711328654 | 6.00E-05 | 0.023374 |
| EYA3         | 2.033549347 | 0.00304  | 0.048647 |
| FAM108C1     | 2.202283196 | 6.00E-04 | 0.026926 |
| FAM115A      | 2.124318373 | 0.00146  | 0.035429 |
| FAM133B      | 2.073402202 | 0.00071  | 0.028439 |
| FAM153B      | 3.328794939 | 0.00013  | 0.023374 |
| FAM40B       | 3.010493495 | 7.00E-05 | 0.023374 |
| FAM73A       | 2.64634288  | 0.00016  | 0.023374 |
| FANCD2       | 2.500124605 | 7.00E-05 | 0.023374 |
| FANCG        | 2.142061646 | 0.00046  | 0.02529  |
| FCAR         | 2.622604028 | 0.00207  | 0.041359 |
| FKTN         | 2.067661472 | 0.00267  | 0.045959 |
| FLJ10213     | 2.633533844 | 5.00E-04 | 0.025844 |
| FLJ12078     | 3.333412829 | 0.00022  | 0.023374 |
| FLJ25363     | 2.42670712  | 0.00031  | 0.023374 |
| FLJ34047     | 2.334316204 | 0.00048  | 0.025473 |
| FLJ35390     | 2.114036081 | 0.00264  | 0.045635 |
| FLJ37396     | 2.283109414 | 0.00082  | 0.028967 |
| FLJ38717     | 3.914966602 | 0.00082  | 0.028967 |
| FLJ40722     | 2.726405215 | 8.00E-05 | 0.023374 |
| FLJ44124     | 2.50185816  | 0.00086  | 0.029406 |
| FLJ45256     | 2.542063379 | 0.00152  | 0.035878 |
| FOXRED1      | 2.136130816 | 0.00048  | 0.025473 |
| FUT6         | 2.049113646 | 0.00078  | 0.028967 |
| FYN          | 2.256364275 | 0.00054  | 0.026254 |
| GABPB2       | 2.370185542 | 0.00031  | 0.023374 |
| GALE         | 2.139094176 | 0.00081  | 0.028967 |
| GALNT3       | 3.47256091  | 0.00015  | 0.023374 |
| GALR2        | 2.070529848 | 6.00E-04 | 0.026926 |
| GDPD1        | 2.383365149 | 0.00141  | 0.035178 |

|          |             |          |          |
|----------|-------------|----------|----------|
| GJC1     | 2.394957409 | 0.00021  | 0.023374 |
| GOLGA8A  | 2.283109414 | 0.00154  | 0.036185 |
| GPR1     | 3.033535091 | 2.00E-05 | 0.023374 |
| GPX8     | 2.106722072 | 6.00E-04 | 0.026926 |
| GSDMB    | 2.557971163 | 0.00029  | 0.023374 |
| GSTTP2   | 2.785622961 | 0.00029  | 0.023374 |
| HARS     | 2.109644634 | 0.00026  | 0.023374 |
| HCFC1R1  | 2.284692494 | 0.00058  | 0.026926 |
| HIATL2   | 2.857988279 | 0.00017  | 0.023374 |
| HNRPDL   | 2.156960863 | 0.00126  | 0.034029 |
| HRAS     | 2.191623533 | 0.00021  | 0.023374 |
| HSCB     | 2.433444717 | 0.00023  | 0.023374 |
| HSD17B7  | 2.889860796 | 4.00E-05 | 0.023374 |
| ICA1     | 2.615342697 | 0.00046  | 0.025374 |
| IL10     | 2.375119332 | 3.00E-04 | 0.023374 |
| IL11RA   | 2.344044567 | 0.00082  | 0.028967 |
| IL17RD   | 3.084421651 | 0.00022  | 0.023374 |
| IL18     | 2.450370664 | 0.00014  | 0.023374 |
| ILKAP    | 2.334316204 | 0.00038  | 0.024464 |
| INADL    | 2.477697396 | 0.00017  | 0.023374 |
| INPP5E   | 2.087823855 | 0.00123  | 0.033578 |
| IPP      | 2.324628215 | 0.00084  | 0.029283 |
| ITPR3    | 2.342420362 | 0.00199  | 0.040589 |
| KCTD7    | 2.701948169 | 0.00055  | 0.026379 |
| KIAA0114 | 2.279946545 | 0.00057  | 0.026839 |
| KIAA0492 | 2.363623094 | 0.00164  | 0.037081 |
| KIAA1530 | 2.66474965  | 0.00043  | 0.025216 |
| KIAA1632 | 2.056227653 | 0.00101  | 0.030786 |
| KLF12    | 2.897884309 | 0.00037  | 0.024199 |
| KLHDC4   | 2.006943497 | 0.00034  | 0.024067 |
| LAMA5    | 2.064797071 | 0.00014  | 0.023374 |
| LEP      | 4.161201066 | 1.00E-05 | 0.013363 |
| LILRA5   | 3.171136546 | 0.00024  | 0.023374 |
| LONP2    | 2.300583787 | 0.00018  | 0.023374 |
| LRP5L    | 2.399942765 | 5.00E-04 | 0.025795 |
| LRRC37B2 | 3.153600696 | 0.00013  | 0.023374 |
| LUC7L    | 2.453769955 | 0.00033  | 0.023754 |
| MAPK8IP3 | 2.264197804 | 0.00233  | 0.043643 |
| MBD4     | 2.573978495 | 0.00077  | 0.028967 |
| MBOAT2   | 2.145033234 | 7.00E-05 | 0.023374 |
| MBTD1    | 2.672148157 | 0.00014  | 0.023374 |

|          |             |          |          |
|----------|-------------|----------|----------|
| MCART1   | 2.593679109 | 0.00038  | 0.024464 |
| MCM8     | 2.145033234 | 0.00113  | 0.032359 |
| METT11D1 | 2.826467288 | 0.00039  | 0.024464 |
| METTL1   | 2.051956291 | 0.00035  | 0.024123 |
| MFSD11   | 2.469125214 | 0.00011  | 0.023374 |
| MGC12760 | 2.701948169 | 0.00038  | 0.024464 |
| MGC26356 | 2.30697121  | 0.00045  | 0.02529  |
| MORG1    | 2.211461307 | 0.00112  | 0.032314 |
| MRP63    | 2.391639594 | 0.00064  | 0.02738  |
| MTP18    | 2.391639594 | 0.00025  | 0.023374 |
| MTX1     | 2.200757219 | 0.00036  | 0.024199 |
| N4BP2    | 3.164549205 | 0.00026  | 0.023374 |
| NARF     | 2.047693801 | 0.00037  | 0.024251 |
| NBPF8    | 2.403272099 | 0.00281  | 0.047301 |
| NCBP2    | 2.002774511 | 9.00E-05 | 0.023374 |
| NEK8     | 2.231478645 | 0.00107  | 0.03191  |
| NFYB     | 2.124318373 | 3.00E-04 | 0.023374 |
| NLRP8    | 3.635112466 | 2.00E-04 | 0.023374 |
| NRSN2    | 2.512284762 | 0.00026  | 0.023374 |
| NUBPL    | 3.044066762 | 0.00016  | 0.023374 |
| NUDT1    | 2.345669898 | 0.00189  | 0.039533 |
| OCIAD1   | 2.606294299 | 0.00147  | 0.03551  |
| ORAOV1   | 2.348923942 | 0.00044  | 0.025216 |
| PACAP    | 2.581124981 | 0.00032  | 0.023374 |
| PAF1     | 2.156960863 | 0.00095  | 0.030325 |
| PCDHB19P | 2.234574276 | 0.00021  | 0.023374 |
| PCDHB9   | 3.668016173 | 5.00E-05 | 0.023374 |
| PDE4C    | 2.07915887  | 0.00032  | 0.023374 |
| PDE7A    | 2.844154821 | 6.00E-05 | 0.023374 |
| PHAX     | 2.225300241 | 0.00099  | 0.030755 |
| PHKA2    | 2.308570835 | 0.00096  | 0.030558 |
| PIGX     | 2.973165969 | 0.00014  | 0.023374 |
| PIP5K2B  | 3.20427951  | 0.00026  | 0.023374 |
| PLA2G2D  | 3.545526797 | 0.00018  | 0.023374 |
| PLA2G4B  | 2.924114897 | 0.00051  | 0.02609  |
| PLIN5    | 2.115501927 | 0.00021  | 0.023374 |
| PLXNA4   | 2.056227653 | 6.00E-05 | 0.023374 |
| PML      | 2.491474831 | 0.00053  | 0.026228 |
| PMPCA    | 2.273633946 | 0.00099  | 0.030755 |
| PNPT1    | 2.737767626 | 0.00025  | 0.023374 |
| POFUT1   | 2.245442844 | 0.00037  | 0.024199 |

|          |             |          |          |
|----------|-------------|----------|----------|
| POLR2J4  | 2.503592917 | 0.00024  | 0.023374 |
| POLR3A   | 2.313376368 | 6.00E-05 | 0.023374 |
| PPA2     | 3.278418431 | 0.00011  | 0.023374 |
| PPM1B    | 2.588291309 | 0.00079  | 0.028967 |
| PPP2R3A  | 2.830388321 | 0.00093  | 0.02995  |
| PRKDC    | 2.264197804 | 0.00139  | 0.035162 |
| PRO1853  | 2.360348687 | 0.00069  | 0.027969 |
| PTGR2    | 2.604488379 | 0.00031  | 0.023374 |
| PTP4A2   | 3.47256091  | 9.00E-05 | 0.023374 |
| PTPLAD2  | 2.408274762 | 0.00065  | 0.02738  |
| RAD51    | 2.808889751 | 0.00061  | 0.026926 |
| RAX2     | 2.517514347 | 0.00035  | 0.024123 |
| RAXL1    | 3.233283475 | 0.00032  | 0.023374 |
| RBM3     | 2.243886961 | 0.00151  | 0.035829 |
| RBM33    | 2.440201021 | 0.00081  | 0.028967 |
| RFX4     | 2.507066041 | 2.00E-04 | 0.023374 |
| RHBDL2   | 3.40817638  | 0.00011  | 0.023374 |
| RLTPR    | 2.174976782 | 0.00091  | 0.029719 |
| RNF126   | 2.015307521 | 0.00181  | 0.038962 |
| RNF213   | 2.40994463  | 0.00065  | 0.02738  |
| RPL7L1   | 2.283109414 | 2.00E-04 | 0.023374 |
| RUNDC2C  | 2.533268507 | 0.00012  | 0.023374 |
| SCRIB    | 2.037782393 | 0.00039  | 0.024464 |
| SDHALP1  | 2.366902044 | 0.00013  | 0.023374 |
| SDHAP2   | 3.027233586 | 0.00017  | 0.023374 |
| SF1      | 2.403272099 | 0.00172  | 0.038018 |
| SFMBT2   | 2.37676621  | 0.00049  | 0.025503 |
| SFRS14   | 2.234574276 | 0.00065  | 0.02738  |
| SIGLEC16 | 2.577549261 | 0.00018  | 0.023374 |
| SIGLEC6  | 2.707572558 | 0.00023  | 0.023374 |
| SIPA1L2  | 2.440201021 | 0.00066  | 0.02761  |
| SLC11A2  | 2.239225777 | 0.00169  | 0.037931 |
| SLC16A12 | 2.357078816 | 0.00213  | 0.041737 |
| SLC25A16 | 2.20686748  | 0.00022  | 0.023374 |
| SLC25A20 | 2.524504064 | 0.00052  | 0.02609  |
| SLC35C2  | 2.142061646 | 3.00E-05 | 0.023374 |
| SLC44A4  | 2.167451934 | 0.00048  | 0.025473 |
| SLC4A5   | 2.624422509 | 0.00041  | 0.024733 |
| SLC5A8   | 3.07801444  | 0.00072  | 0.028439 |
| SLC7A5   | 2.357078816 | 0.00039  | 0.024464 |
| SLFN13   | 2.197708435 | 0.00073  | 0.028439 |



|          |             |          |          |
|----------|-------------|----------|----------|
| SMCR5    | 3.552907183 | 1.00E-04 | 0.023374 |
| SNAPC1   | 3.391679859 | 4.00E-04 | 0.024464 |
| SNORA25  | 2.618970846 | 0.00077  | 0.028967 |
| SNORD104 | 2.287861946 | 5.00E-04 | 0.025795 |
| SNRNP25  | 2.256364275 | 0.00201  | 0.040819 |
| SNRNP70  | 2.066228775 | 0.00048  | 0.025473 |
| SPC24    | 2.547354951 | 8.00E-05 | 0.023374 |
| SPTLC1   | 2.096524951 | 0.00028  | 0.023374 |
| SSTR2    | 3.547985221 | 0.0014   | 0.035178 |
| STAG3L2  | 2.50185816  | 0.00104  | 0.031347 |
| STAG3L3  | 2.707572558 | 0.00021  | 0.023374 |
| STAR     | 2.593679109 | 3.00E-05 | 0.023374 |
| STARD5   | 2.046274939 | 0.00103  | 0.031314 |
| STIL     | 2.053379091 | 4.00E-04 | 0.024464 |
| SYAP1    | 3.30351066  | 0.00088  | 0.029497 |
| SYNJ2BP  | 2.433444717 | 0.00207  | 0.041387 |
| TARBP2   | 2.128740365 | 3.00E-04 | 0.023374 |
| TDRD1    | 2.184041091 | 0.00014  | 0.023374 |
| TMEM1    | 2.022304162 | 0.00046  | 0.02529  |
| TMEM106A | 2.936301272 | 0.00015  | 0.023374 |
| TMEM137  | 3.513721873 | 8.00E-05 | 0.023374 |
| TMEM156  | 2.226843236 | 0.003    | 0.048473 |
| TMEM191A | 2.433444717 | 4.00E-05 | 0.023374 |
| TMEM222  | 2.080600533 | 0.0012   | 0.033206 |
| TNFSF14  | 2.396618043 | 0.0025   | 0.044589 |
| TNFSF15  | 2.595477534 | 0.00076  | 0.028967 |
| TSR1     | 2.168954818 | 2.00E-05 | 0.023374 |
| TUBG1    | 2.219138944 | 0.00126  | 0.034029 |
| TUBGCP6  | 2.011121161 | 0.00014  | 0.023374 |
| UNKL     | 2.289448321 | 0.00033  | 0.023374 |
| USP33    | 2.029325093 | 0.00149  | 0.035578 |
| USP48    | 2.265767771 | 0.00043  | 0.025216 |
| USP49    | 2.446976082 | 0.00013  | 0.023374 |
| VAR52    | 2.162949527 | 0.00025  | 0.023374 |
| VPS13C   | 2.086377187 | 0.00111  | 0.032178 |
| VPS41    | 3.251262408 | 0.00079  | 0.028967 |
| WBSCR19  | 2.398279828 | 6.00E-04 | 0.026926 |
| WDR33    | 2.087823855 | 0.00099  | 0.030755 |
| WDR51A   | 2.408274762 | 0.00083  | 0.0291   |
| WDR74    | 3.029332632 | 0.00027  | 0.023374 |
| ZBTB32   | 2.606294299 | 0.00089  | 0.029497 |

|        |             |          |          |
|--------|-------------|----------|----------|
| ZNF223 | 2.766381258 | 5.00E-04 | 0.025795 |
| ZNF320 | 2.688869988 | 0.00142  | 0.035178 |
| ZNF346 | 2.197708435 | 0.00064  | 0.02738  |
| ZNF430 | 2.577549261 | 0.00032  | 0.023374 |
| ZNF486 | 2.381713699 | 0.00145  | 0.035338 |
| ZNF493 | 2.661058082 | 0.00049  | 0.025473 |
| ZNF526 | 2.46058269  | 0.00072  | 0.028439 |
| ZNF557 | 2.758721844 | 0.00017  | 0.023374 |
| ZNF577 | 2.62988552  | 0.00012  | 0.023374 |
| ZNF600 | 2.469125214 | 0.00048  | 0.025473 |
| ZNF626 | 2.316585612 | 0.00147  | 0.03551  |
| ZNF652 | 2.672148157 | 0.00095  | 0.030331 |
| ZNF669 | 2.659214216 | 0.00018  | 0.023374 |
| ZNF682 | 3.51128719  | 0.00032  | 0.023374 |
| ZNF738 | 3.084421651 | 2.00E-04 | 0.023374 |
| ZNF763 | 2.334316204 | 0.00043  | 0.025216 |
| ZNF773 | 2.302178983 | 0.00049  | 0.025658 |
| ZNF786 | 2.96493402  | 0.00011  | 0.023374 |
| ZNF860 | 2.565073206 | 0.00306  | 0.048798 |
| ZNF93  | 2.606294299 | 2.00E-04 | 0.023374 |
| ZRANB2 | 2.273633946 | 0.0032   | 0.049727 |

**Supplementary Table S2b: Genes differentially regulated between *P. falciparum* (F) versus *P. falciparum* convalescence (AF)**

| <b>Genes up regulated in <i>P. falciparum</i> (F)</b> | <b>FC&gt;2</b> | <b>P value</b> | <b>FDR corrected P value</b> |
|-------------------------------------------------------|----------------|----------------|------------------------------|
| C4orf18                                               | 8.597993383    | 0.00011        | 0.04878                      |
| CD1D                                                  | 3.470154749    | 7.00E-05       | 0.046782                     |
| CD36                                                  | 3.570187886    | 9.00E-05       | 0.04899                      |
| CPVL                                                  | 4.38932775     | 3.00E-05       | 0.04364                      |
| CYFIP1                                                | 3.768525096    | 2.00E-05       | 0.04368                      |
| DPYSL2                                                | 3.101572825    | 0.00011        | 0.03878                      |
| EPB4IL3                                               | 7.125543205    | 1.00E-05       | 0.03367                      |
| F13A1                                                 | 11.54342949    | 4.00E-05       | 0.04368                      |
| FZD2                                                  | 7.495371575    | 0              | 0.038085                     |
| LCMT2                                                 | 2.781763943    | 4.00E-05       | 0.04368                      |
| MS4A7                                                 | 5.172995728    | 4.00E-05       | 0.04367                      |
| PNKD                                                  | 3.44857418     | 0.00011        | 0.03871                      |
| RAB4A                                                 | 3.000077979    | 4.00E-05       | 0.04368                      |
| SLC7A7                                                | 4.25748073     | 7.00E-05       | 0.040883                     |
| TNS3                                                  | 3.784230587    | 7.00E-05       | 0.046782                     |
| VCL                                                   | 5.637283021    | 1.00E-04       | 0.04176                      |

| <b>Genes down regulated in <i>P. falciparum</i></b> | <b>FC&lt;-2 (in -ve)</b> | <b>P value</b> | <b>FDR corrected P value</b> |
|-----------------------------------------------------|--------------------------|----------------|------------------------------|
| AGAP8                                               | 3.711493906              | 4.00E-05       | 0.04368                      |
| ATG2A                                               | 2.595477534              | 1.00E-05       | 0.04368                      |
| BCL2                                                | 2.909961367              | 3.00E-05       | 0.04368                      |
| C20orf107                                           | 2.239225777              | 1.00E-04       | 0.04878                      |
| D2HGDH                                              | 3.020945171              | 4.00E-05       | 0.04368                      |
| DAPK2                                               | 2.774061938              | 6.00E-05       | 0.04368                      |
| DHRS9                                               | 2.869899069              | 9.00E-05       | 0.04878                      |
| DPEP3                                               | 2.926142441              | 0.00011        | 0.04878                      |
| EYA3                                                | 3.955883666              | 5.00E-05       | 0.04368                      |
| GSPT1                                               | 2.308570835              | 1.00E-04       | 0.04878                      |
| METT11D1                                            | 3.711493906              | 4.00E-05       | 0.04368                      |
| REC8                                                | 2.547354951              | 0.00011        | 0.04878                      |
| RUNDC3A                                             | 5.248845018              | 1.00E-04       | 0.04878                      |
| SLC7A5                                              | 5.021087965              | 7.00E-05       | 0.047462                     |
| SNORA57                                             | 2.043440165              | 0.00011        | 0.04878                      |
| SNX26                                               | 2.496661098              | 4.00E-05       | 0.04368                      |
| SPNS2                                               | 2.396618043              | 8.00E-05       | 0.04878                      |
| STXBP5                                              | 2.830388321              | 0.00012        | 0.04878                      |

|        |             |          |          |
|--------|-------------|----------|----------|
| TGM3   | 3.217633484 | 8.00E-05 | 0.047462 |
| TRIM10 | 2.225300241 | 0.00012  | 0.04878  |
| TRPM6  | 2.438510188 | 1.00E-05 | 0.04223  |
| YPEL4  | 3.528365461 | 6.00E-05 | 0.04368  |

**Supplementary Table S2c: Genes differentially regulated between *P. falciparum* (F) versus GSE 45919 malaria naïve US adults (N)**

| <b>Genes up regulated in <i>P.falciparum</i> (F)</b> | <b>FC&gt;2</b> | <b>P value</b> | <b>FDR corrected P value</b> |
|------------------------------------------------------|----------------|----------------|------------------------------|
| ABAT                                                 | 2.040609       | 0.00043        | 0.007277                     |
| ABCA1                                                | 2.812786       | 0.00085        | 0.01149                      |
| ABCC3                                                | 7.076323       | 1.00E-05       | 0.000383                     |
| ABCC4                                                | 3.635112       | 5.00E-04       | 0.008107                     |
| ABCD1                                                | 2.662903       | 3.00E-05       | 0.001291                     |
| ABCF3                                                | 8.011098       | 3.00E-05       | 0.001266                     |
| ABHD2                                                | 2.482855       | 0.00642        | 0.043431                     |
| ABHD4                                                | 2.629886       | 2.00E-04       | 0.004301                     |
| ABHD5                                                | 2.606294       | 0.00021        | 0.004469                     |
| ABI3                                                 | 5.35171        | 0              | 0.000304                     |
| ABLIM3                                               | 2.259494       | 0.00086        | 0.011606                     |
| ACADS                                                | 3.810552       | 1.00E-05       | 0.000405                     |
| ACOT7                                                | 11.98369       | 0              | 2.00E-05                     |
| ACOX1                                                | 2.779836       | 0.00032        | 0.005992                     |
| ACP2                                                 | 4.623547       | 0.00611        | 0.042008                     |
| ACRBP                                                | 2.626242       | 0.00141        | 0.015952                     |
| ACSBG1                                               | 2.265768       | 0.00478        | 0.035643                     |
| ACSL1                                                | 4.225143       | 0.00182        | 0.018748                     |
| ACTN1                                                | 14.01597       | 0              | 0.000249                     |
| ACTN4                                                | 3.839717       | 0.00038        | 0.006719                     |
| ACVR1B                                               | 2.037782       | 0.00398        | 0.031804                     |
| ADAMTSL4                                             | 2.481135       | 0.00099        | 0.012759                     |
| ADAP1                                                | 3.305801       | 0              | 4.10E-05                     |
| ADAP2                                                | 2.168955       | 0.00104        | 0.013161                     |
| ADAT3                                                | 2.440201       | 1.00E-05       | 0.000383                     |
| ADIPOR1                                              | 4.072741       | 0.00212        | 0.020755                     |
| ADM                                                  | 2.308571       | 0.00713        | 0.04662                      |
| ADORA2B                                              | 3.050403       | 0.00062        | 0.009324                     |
| ADPRH                                                | 4.566219       | 0              | 0.000164                     |
| AFAP1L2                                              | 3.2898         | 0.00653        | 0.043877                     |
| AFTPH                                                | 3.116658       | 0.00462        | 0.034881                     |
| AGBL5                                                | 3.73472        | 0.00025        | 0.005069                     |
| AGPAT1                                               | 2.334316       | 0.00241        | 0.022615                     |
| AGPAT2                                               | 2.267339       | 9.00E-05       | 0.002455                     |
| AGPAT3                                               | 2.07484        | 0.00309        | 0.026838                     |
| AGTRAP                                               | 3.417639       | 0.00287        | 0.025583                     |
| AHDC1                                                | 8.597993       | 1.00E-04       | 0.00264                      |

|                 |          |          |          |
|-----------------|----------|----------|----------|
| ALAS2           | 3.980639 | 0.00173  | 0.018182 |
| ALDH3B1         | 2.303775 | 0.0054   | 0.038658 |
| ALG1            | 2.540302 | 2.00E-04 | 0.004231 |
| ALOX12          | 2.16295  | 0.00379  | 0.03089  |
| ALPK1           | 3.351949 | 0.00471  | 0.035339 |
| AMY1A           | 2.644509 | 0.00018  | 0.004028 |
| AMY1B           | 25.93808 | 0.00045  | 0.00755  |
| ANG             | 3.829086 | 2.00E-04 | 0.004312 |
| ANK1            | 2.084932 | 0.00122  | 0.014618 |
| ANKHD1-EIF4EBP3 | 16.79547 | 0        | 5.80E-05 |
| ANKRD22         | 3.301222 | 0.00015  | 0.003494 |
| ANKRD50         | 4.481557 | 0        | 3.80E-05 |
| ANKRD9          | 4.81655  | 0        | 6.00E-06 |
| ANO10           | 2.039195 | 0.00594  | 0.041163 |
| ANXA2           | 4.85678  | 3.00E-05 | 0.001054 |
| ANXA2P1         | 2.358713 | 0.00017  | 0.003884 |
| AP1B1           | 6.502525 | 0.00284  | 0.025402 |
| AP2A1           | 2.496661 | 0.00191  | 0.019361 |
| AP3S2           | 5.274374 | 0.00076  | 0.010631 |
| APBB1IP         | 2.281527 | 4.00E-05 | 0.0015   |
| APEX2           | 2.394957 | 0.00107  | 0.013446 |
| APH1B           | 2.584706 | 0.00102  | 0.013017 |
| APOBEC3C        | 2.234574 | 0.00071  | 0.010184 |
| AQP10           | 4.681595 | 0.00044  | 0.007402 |
| AQP9            | 8.106055 | 4.00E-05 | 0.001418 |
| ARAP3           | 6.736504 | 0.00015  | 0.003529 |
| ARG2            | 2.022304 | 0.00399  | 0.031808 |
| ARHGAP17        | 2.928171 | 1.00E-05 | 0.000589 |
| ARHGDI1A        | 2.950583 | 4.00E-05 | 0.001362 |
| ARHGEF11        | 2.51577  | 8.00E-05 | 0.002348 |
| ARID3A          | 2.694467 | 2.00E-05 | 0.000839 |
| ARMC5           | 7.889862 | 0.00068  | 0.009968 |
| ARMC6           | 5.201761 | 4.00E-05 | 0.001337 |
| ARMC7           | 2.493202 | 0.00436  | 0.033627 |
| ARRB1           | 2.264198 | 0.0015   | 0.016606 |
| ARRDC1          | 2.701948 | 0.00494  | 0.03633  |
| ARSD            | 2.501858 | 2.00E-05 | 0.000951 |
| ART1            | 3.448574 | 5.00E-05 | 0.001617 |
| ASAP2           | 2.781764 | 1.00E-05 | 0.000681 |
| ASF1B           | 2.566852 | 0.00023  | 0.004804 |
| ASGR2           | 2.273634 | 0.00181  | 0.018724 |

|         |          |          |          |
|---------|----------|----------|----------|
| ASNA1   | 2.370186 | 0.00052  | 0.008346 |
| ATG9A   | 2.730187 | 0.00125  | 0.014821 |
| ATL3    | 3.961371 | 4.00E-05 | 0.001455 |
| ATN1    | 3.173335 | 0.00014  | 0.003359 |
| ATOX1   | 3.140512 | 0.00016  | 0.003592 |
| ATP13A2 | 2.938337 | 0.00159  | 0.017236 |
| ATP5G2  | 3.38933  | 6.00E-05 | 0.001976 |
| ATP6V0C | 3.724379 | 0        | 0.000147 |
| ATP9A   | 3.063116 | 0.00051  | 0.008233 |
| ATXN2L  | 3.14269  | 0.00271  | 0.02461  |
| AURKA   | 2.093621 | 0.00032  | 0.00595  |
| B3GALT4 | 2.284692 | 0.00165  | 0.017702 |
| B3GNT8  | 2.008335 | 0.00139  | 0.015767 |
| B4GALT5 | 2.749177 | 0.00093  | 0.012208 |
| BAK1    | 2.481135 | 8.00E-05 | 0.002267 |
| BAMBI   | 2.668446 | 0.00094  | 0.0123   |
| BASP1   | 2.946495 | 0.0011   | 0.013678 |
| BAT4    | 2.182528 | 0.00035  | 0.0063   |
| BATF    | 4.823231 | 0.00024  | 0.004902 |
| BATF2   | 2.570413 | 0.00727  | 0.047259 |
| BCAT1   | 3.786855 | 0.00172  | 0.018173 |
| BCL2L1  | 3.361255 | 0.00252  | 0.02341  |
| BCL3    | 3.928558 | 0.00041  | 0.007027 |
| BCORL1  | 4.910943 | 1.00E-05 | 0.000419 |
| BCR     | 2.193143 | 0.00065  | 0.009596 |
| BEGAIN  | 2.662903 | 0.00507  | 0.037032 |
| BEST1   | 3.328795 | 0.00479  | 0.035666 |
| BEX1    | 2.722628 | 0.00041  | 0.007031 |
| BLM     | 2.273634 | 8.00E-04 | 0.011036 |
| BLOC1S1 | 2.148009 | 0.00542  | 0.038674 |
| BMF     | 3.335724 | 0.00018  | 0.004001 |
| BMP6    | 3.572663 | 0.00435  | 0.033571 |
| BMP8B   | 4.737086 | 0.00053  | 0.008429 |
| BRSK1   | 3.528365 | 0.00064  | 0.009475 |
| BSG     | 2.286277 | 0.00065  | 0.009574 |
| BST1    | 3.244509 | 0.00056  | 0.008683 |
| BTD     | 2.842184 | 0.00029  | 0.005628 |
| BYSL    | 2.441893 | 0.00195  | 0.019623 |
| C1QA    | 4.723971 | 0.00292  | 0.025877 |
| C1QB    | 2.889861 | 2.00E-05 | 0.000898 |
| C1QC    | 2.108183 | 0.00076  | 0.010663 |

|          |          |          |          |
|----------|----------|----------|----------|
| C2       | 2.037782 | 0.00183  | 0.018812 |
| C2CD2L   | 2.182528 | 0.00189  | 0.019255 |
| C2orf18  | 63.03145 | 0.00251  | 0.023353 |
| C3AR1    | 3.044067 | 0        | 4.90E-05 |
| C5AR1    | 3.31498  | 0        | 0.000133 |
| CA1      | 3.149232 | 0.00021  | 0.004458 |
| CA2      | 3.42238  | 0.00043  | 0.007294 |
| CABP5    | 11.75335 | 0.00019  | 0.004198 |
| CALCOCO1 | 3.120982 | 0        | 6.00E-06 |
| CALD1    | 3.818484 | 0.00013  | 0.00317  |
| CALML4   | 2.073402 | 0.00075  | 0.010591 |
| CAMK1    | 2.783693 | 0        | 0.000152 |
| CAMP     | 2.642677 | 0.00018  | 0.004058 |
| CAMTA2   | 3.708922 | 0.00338  | 0.028568 |
| CAPNS1   | 7.417844 | 0.00474  | 0.035433 |
| CAPZA1   | 2.448673 | 9.00E-05 | 0.002445 |
| CARD16   | 3.000078 | 0.00192  | 0.019434 |
| CASP3    | 13.46367 | 0.00012  | 0.003062 |
| CASP5    | 6.399681 | 0.00485  | 0.03587  |
| CASP9    | 6.151763 | 1.00E-05 | 0.000363 |
| CBARA1   | 2.977291 | 0        | 0.000285 |
| CBR1     | 2.462289 | 0.00508  | 0.037064 |
| CBX3     | 6.703897 | 0.00013  | 0.003175 |
| CBX8     | 2.034959 | 0        | 4.00E-06 |
| CCDC109A | 2.733975 | 0.00617  | 0.042247 |
| CCDC127  | 33.31269 | 0.00722  | 0.047069 |
| CCDC71   | 2.403272 | 8.00E-05 | 0.00228  |
| CCDC90A  | 2.626242 | 0.00011  | 0.002759 |
| CCR1     | 3.151416 | 0.00081  | 0.011116 |
| CCR2     | 2.348924 | 0.00018  | 0.004087 |
| CD151    | 2.393298 | 0.00364  | 0.030012 |
| CD163    | 4.466052 | 0.00012  | 0.003    |
| CD226    | 2.302179 | 0.0016   | 0.017274 |
| CD4      | 3.427128 | 0.00458  | 0.034697 |
| CD63     | 2.6926   | 0.00035  | 0.006349 |
| CD68     | 2.240778 | 0.00056  | 0.008745 |
| CD74     | 2.475981 | 0.00285  | 0.025446 |
| CD84     | 2.639016 | 0.00024  | 0.004893 |
| CD9      | 2.067661 | 3.00E-05 | 0.001189 |
| CDA      | 2.226843 | 0.00532  | 0.038242 |
| CDC14B   | 3.923116 | 0.00422  | 0.032985 |



|             |          |          |          |
|-------------|----------|----------|----------|
| CDC42BPB    | 3.217633 | 0        | 0.00018  |
| CDC42EP2    | 4.195957 | 0.00072  | 0.010281 |
| CDGAP       | 2.66475  | 0.00721  | 0.04704  |
| CDH6        | 5.696201 | 0.00596  | 0.041252 |
| CDIPT       | 3.25803  | 0        | 0.000146 |
| CEACAM3     | 3.105876 | 4.00E-04 | 0.006907 |
| CEBPA       | 2.60991  | 0.00439  | 0.033756 |
| CEBPE       | 2.318192 | 0.006    | 0.041393 |
| CECR1       | 3.033535 | 0.00754  | 0.048319 |
| CECR6       | 2.211461 | 0.00093  | 0.012173 |
| CENPA       | 5.180172 | 0.00214  | 0.020816 |
| CENPBD1     | 2.313376 | 0        | 7.00E-06 |
| CETP        | 2.45207  | 0.00275  | 0.024845 |
| CFP         | 2.023706 | 0.00094  | 0.012276 |
| CHCHD10     | 3.701218 | 0.00541  | 0.038674 |
| CHMP1A      | 3.439026 | 2.00E-05 | 0.000771 |
| CHST14      | 4.753532 | 5.00E-05 | 0.001636 |
| CICK0721Q.1 | 3.77637  | 0        | 0.000202 |
| CINP        | 4.228072 | 0        | 2.00E-06 |
| CKAP4       | 3.224331 | 1.00E-05 | 0.000669 |
| CKB         | 2.17347  | 0.00095  | 0.01242  |
| CLC         | 2.871889 | 0.00167  | 0.01785  |
| CLDN5       | 2.084932 | 0.00273  | 0.024719 |
| CLEC1B      | 3.140512 | 0.00217  | 0.021016 |
| CLEC4D      | 5.680429 | 0.00103  | 0.013093 |
| CLIP2       | 5.080604 | 0        | 0.000239 |
| CLN6        | 2.188587 | 0.00091  | 0.012102 |
| CLP1        | 3.625048 | 0.00467  | 0.03514  |
| CMTM5       | 2.033549 | 6.00E-05 | 0.001945 |
| CNOT6L      | 2.887858 | 0.00015  | 0.003592 |
| CNPY3       | 7.09597  | 0.00123  | 0.01471  |
| COL6A3      | 4.310933 | 7.00E-05 | 0.001991 |
| COX15       | 3.513722 | 6.00E-05 | 0.001968 |
| CPNE5       | 2.331082 | 3.00E-05 | 0.001294 |
| CPT1A       | 3.326488 | 0.00521  | 0.037678 |
| CPT2        | 3.190981 | 0        | 5.50E-05 |
| CRAT        | 2.644509 | 0.00034  | 0.006235 |
| CRISPLD2    | 2.399943 | 8.00E-05 | 0.002316 |
| CRNKL1      | 2.926142 | 0.00176  | 0.018377 |
| CRSP6       | 3.01676  | 3.00E-04 | 0.005649 |
| CSK         | 27.43603 | 0.00389  | 0.03137  |

|                |          |          |          |
|----------------|----------|----------|----------|
| CTDSPL         | 6.386387 | 0        | 4.00E-06 |
| CTNNA1         | 15.21055 | 1.00E-04 | 0.002686 |
| CTSA           | 2.273634 | 0        | 4.50E-05 |
| CTSD           | 4.047413 | 0.00092  | 0.012171 |
| CTSL1          | 3.217633 | 0        | 0.000315 |
| CTSZ           | 2.208398 | 1.00E-05 | 0.000405 |
| CTTN           | 13.89987 | 0.00038  | 0.006645 |
| CX3CR1         | 2.208398 | 0        | 5.80E-05 |
| CXCL10         | 2.167452 | 0.00056  | 0.008724 |
| CXCL5          | 2.51577  | 0.00025  | 0.005032 |
| CXCR6          | 2.371829 | 0.00228  | 0.021773 |
| CYB5R2         | 4.90754  | 0.00035  | 0.006286 |
| CYB5R3         | 2.606294 | 0.00136  | 0.015574 |
| CYFIP1         | 2.015308 | 0.00015  | 0.003531 |
| CYLN2          | 4.08688  | 0.00209  | 0.020549 |
| CYP2F1         | 3.108029 | 0        | 0.000146 |
| CYP4F22        | 2.112571 | 0.00123  | 0.014697 |
| DAB2           | 2.161451 | 0.00378  | 0.030804 |
| DAG1           | 2.250117 | 0.00113  | 0.013935 |
| DAK            | 15.01154 | 0.00026  | 0.005119 |
| DBNL           | 2.106722 | 0        | 1.20E-05 |
| DCTN1          | 2.009728 | 0.00157  | 0.017082 |
| DDEF2          | 6.830542 | 0.00747  | 0.048064 |
| DDX58          | 6.538683 | 0.00263  | 0.024128 |
| DEDD           | 3.893317 | 0.00147  | 0.016432 |
| DEFA1          | 3.721799 | 0.00502  | 0.036802 |
| DEFA1B         | 2.479415 | 0.00632  | 0.042952 |
| DEFA3          | 18.94835 | 0.00225  | 0.021569 |
| DEFA4          | 7.240052 | 0        | 1.40E-05 |
| DENND1A        | 6.050272 | 0        | 3.00E-06 |
| DHCR24         | 3.807912 | 0.00061  | 0.009193 |
| DHCR7          | 4.472247 | 0.00035  | 0.006286 |
| DHRS9          | 2.588291 | 0.00636  | 0.043144 |
| DHX8           | 2.179504 | 0.00169  | 0.017971 |
| DKFZp686I15217 | 4.813212 | 0.00053  | 0.00836  |
| DLGAP4         | 2.295805 | 0.00062  | 0.009324 |
| DNM3           | 4.646035 | 0.00352  | 0.029359 |
| DOCK5          | 2.85997  | 0.00102  | 0.012947 |
| DOK2           | 2.352183 | 0.0055   | 0.039171 |
| DOK3           | 6.346671 | 0.00377  | 0.030781 |
| DOLK           | 2.425026 | 1.00E-05 | 0.000396 |

|         |          |          |          |
|---------|----------|----------|----------|
| DPP3    | 7.210004 | 0.00175  | 0.018339 |
| DRAM1   | 3.662935 | 0.00071  | 0.010184 |
| DRAP1   | 2.507066 | 0.00102  | 0.013008 |
| DSE     | 3.32188  | 0.00646  | 0.043593 |
| DULLARD | 2.469125 | 6.00E-05 | 0.001854 |
| DYRK1B  | 3.592529 | 4.00E-04 | 0.006918 |
| DYSF    | 3.650262 | 0.00047  | 0.007741 |
| EBI3    | 2.930202 | 1.00E-05 | 0.000369 |
| ECE1    | 2.579337 | 0.00028  | 0.005492 |
| ECE2    | 2.146521 | 0.00656  | 0.043997 |
| ECGF1   | 2.134651 | 0.00012  | 0.002936 |
| ECHDC3  | 182.0259 | 0.00042  | 0.007167 |
| EDC3    | 126.6761 | 1.00E-05 | 0.000468 |
| EFNB1   | 85.98422 | 5.00E-05 | 0.001606 |
| EGF     | 8.672217 | 0.00017  | 0.003937 |
| EHD3    | 144.6076 | 0.00016  | 0.00368  |
| EHMT2   | 19.3063  | 4.00E-05 | 0.001313 |
| ELMO2   | 3.642679 | 0.00264  | 0.024163 |
| ELP4    | 2.969047 | 0.00034  | 0.006211 |
| EMR1    | 2.584706 | 1.00E-05 | 0.000592 |
| ENDOD1  | 2.508804 | 0.00299  | 0.026253 |
| ENG     | 3.408176 | 0.00367  | 0.030103 |
| EPB41L3 | 4.710891 | 0.00114  | 0.014029 |
| EPB49   | 3.384634 | 0.00153  | 0.016848 |
| EPHX1   | 2.666597 | 0.00211  | 0.020695 |
| EPN1    | 2.294214 | 0.00117  | 0.014277 |
| EPOR    | 3.612506 | 0.0021   | 0.020586 |
| EPS15L1 | 2.323017 | 0.00208  | 0.020487 |
| EPSTI1  | 2.253238 | 0.00049  | 0.007948 |
| ERC1    | 2.179504 | 0.00329  | 0.028061 |
| ERCC1   | 6.220368 | 0.00711  | 0.046532 |
| ERLIN1  | 5.080604 | 0        | 9.00E-05 |
| ESAM    | 3.335724 | 0        | 6.00E-06 |
| ESRRA   | 3.056753 | 0.0017   | 0.018    |
| EVI2B   | 3.14269  | 0.00314  | 0.027111 |
| EXOSC4  | 2.718856 | 0.00053  | 0.008369 |
| F11R    | 2.547355 | 1.00E-05 | 0.000403 |
| F13A1   | 2.90593  | 0.00287  | 0.025609 |
| F2R     | 3.685857 | 5.00E-05 | 0.001772 |
| F2RL3   | 3.450965 | 0.00673  | 0.044799 |
| FADD    | 16.18965 | 0.00026  | 0.005102 |

|          |          |          |          |
|----------|----------|----------|----------|
| FADS1    | 5.115942 | 9.00E-05 | 0.00251  |
| FAH      | 2.185555 | 0.00329  | 0.028048 |
| FAM100A  | 2.408275 | 0.00143  | 0.016126 |
| FAM110A  | 2.42839  | 0.00038  | 0.006679 |
| FAM125B  | 2.591882 | 0.00143  | 0.016107 |
| FAM127B  | 2.156961 | 0.00168  | 0.017902 |
| FAM129B  | 3.202059 | 0.00144  | 0.016204 |
| FAM176B  | 2.563296 | 3.00E-05 | 0.00125  |
| FAM189B  | 2.628063 | 0        | 2.00E-06 |
| FAM20C   | 2.056228 | 0.00023  | 0.004771 |
| FAM50B   | 2.488023 | 0.00135  | 0.015534 |
| FAM69B   | 2.159953 | 0.00125  | 0.01479  |
| FAM86C   | 2.109645 | 6.00E-04 | 0.009193 |
| FAM89A   | 7.305586 | 0.00749  | 0.048131 |
| FAM89B   | 2.720742 | 0.001    | 0.012801 |
| FAR2     | 5.151527 | 0.00705  | 0.046333 |
| FASLG    | 2.361985 | 0.00081  | 0.011153 |
| FBLN1    | 19.83532 | 0.00405  | 0.032131 |
| FBP1     | 3.24226  | 0        | 5.00E-06 |
| FBS1     | 2.156961 | 1.00E-05 | 0.000403 |
| FBXO6    | 4.011106 | 3.00E-04 | 0.005746 |
| FCER1G   | 2.053379 | 0        | 9.60E-05 |
| FCGR1A   | 3.090842 | 0.00132  | 0.015335 |
| FCGR1B   | 2.418311 | 0.00079  | 0.010997 |
| FCGR1C   | 2.053379 | 0.00109  | 0.013626 |
| FCGRT    | 2.96288  | 0.00011  | 0.002844 |
| FER1L3   | 13.90951 | 0.00024  | 0.004941 |
| FERMT3   | 2.61172  | 0        | 8.00E-05 |
| FGR      | 2.521007 | 0.00431  | 0.033438 |
| FHL2     | 3.231043 | 0.00245  | 0.022884 |
| FIBP     | 3.627561 | 0.00216  | 0.020987 |
| FKBP1A   | 8.693879 | 3.00E-05 | 0.001039 |
| FKBP1B   | 2.579337 | 7.00E-05 | 0.002106 |
| FKBP8    | 4.011106 | 0.00253  | 0.023466 |
| FKBP9L   | 2.834315 | 2.00E-05 | 0.000763 |
| FLJ10357 | 2.826467 | 8.00E-05 | 0.002316 |
| FLJ10986 | 5.03852  | 0.00099  | 0.012756 |
| FLJ12355 | 7.521394 | 5.00E-05 | 0.001699 |
| FLJ20489 | 2.199232 | 0.00027  | 0.005249 |
| FLJ22662 | 3.088701 | 0.00183  | 0.018843 |
| FLJ45032 | 2.944454 | 1.00E-05 | 0.000411 |

|          |          |          |          |
|----------|----------|----------|----------|
| FLJ45337 | 2.572195 | 0.00055  | 0.008557 |
| FLVCR2   | 3.269341 | 0.00381  | 0.030936 |
| FMNL1    | 2.049114 | 1.00E-05 | 0.000475 |
| FMO5     | 5.190955 | 0.00156  | 0.017081 |
| FOXMI    | 3.157976 | 0.00068  | 0.009995 |
| FPR1     | 4.272262 | 0.00072  | 0.010293 |
| FPR2     | 2.219139 | 0.00138  | 0.015706 |
| FRAT2    | 2.810837 | 0.00032  | 0.005902 |
| FRMD3    | 2.644509 | 0.00102  | 0.01301  |
| FSCN1    | 2.75681  | 0.00042  | 0.007099 |
| FSTL1    | 2.080601 | 2.00E-04 | 0.004284 |
| FSTL3    | 2.339175 | 0.00349  | 0.029146 |
| FTHL11   | 4.904139 | 0.0021   | 0.020625 |
| FTHL2    | 2.181015 | 1.00E-05 | 0.000643 |
| FUCA1    | 3.552907 | 0.00703  | 0.046262 |
| FURIN    | 2.793357 | 0.00052  | 0.008286 |
| FUT8     | 2.879863 | 0.00035  | 0.006328 |
| FXR2     | 7.840795 | 0.00293  | 0.025926 |
| FXYD6    | 6.164569 | 1.00E-05 | 0.000565 |
| FZD1     | 5.490738 | 0.00525  | 0.03789  |
| FZD2     | 4.08688  | 0.00032  | 0.00595  |
| G6PC3    | 2.355446 | 0.0019   | 0.019323 |
| G6PD     | 3.942197 | 0.0014   | 0.015859 |
| GAA      | 3.781608 | 0.00182  | 0.018748 |
| GAB2     | 3.615011 | 0.0011   | 0.013697 |
| GALNT6   | 2.013911 | 0        | 8.90E-05 |
| GAPDH    | 4.633171 | 9.00E-04 | 0.011959 |
| GAPDHL6  | 3.71922  | 0.00025  | 0.005069 |
| GART     | 2.366902 | 3.00E-05 | 0.001186 |
| GAS2L1   | 2.700076 | 0.00247  | 0.023083 |
| GAS6     | 2.013911 | 0.00013  | 0.003181 |
| GAS7     | 2.300584 | 0.00315  | 0.027222 |
| GATA1    | 6.556837 | 0.00046  | 0.007571 |
| GBA      | 2.334316 | 1.00E-05 | 0.000502 |
| GCNT1    | 2.051956 | 0.00287  | 0.025606 |
| GDE1     | 2.460583 | 0.00076  | 0.010663 |
| GEMIN6   | 5.921653 | 0.00147  | 0.016414 |
| GFI1B    | 3.2898   | 2.00E-05 | 0.000786 |
| GIMAP4   | 2.030732 | 0.00036  | 0.00646  |
| GIMAP8   | 2.889861 | 0.00237  | 0.022397 |
| GINS3    | 2.936301 | 0.00085  | 0.011524 |

|         |          |          |          |
|---------|----------|----------|----------|
| GIPC1   | 3.06524  | 0.00204  | 0.02017  |
| GK      | 2.002775 | 0.00334  | 0.028333 |
| GLB1    | 2.106722 | 0.00014  | 0.003322 |
| GLIPR1  | 6.745849 | 0.00213  | 0.020766 |
| GLTPD1  | 7.743576 | 0.00446  | 0.034173 |
| GMPR    | 3.282966 | 4.00E-05 | 0.001341 |
| GNA12   | 4.135323 | 0.00787  | 0.049778 |
| GNA15   | 3.331103 | 0.00374  | 0.030606 |
| GNAI2   | 2.909961 | 0.00054  | 0.008557 |
| GNG11   | 3.108029 | 0.00517  | 0.03749  |
| GNG8    | 2.842184 | 0.00054  | 0.008524 |
| GNS     | 2.206867 | 0.00023  | 0.004712 |
| GORASP2 | 5.735821 | 0.00159  | 0.017232 |
| GOSR2   | 4.109606 | 5.00E-05 | 0.001651 |
| GP1BA   | 5.660777 | 0.00018  | 0.00399  |
| GP6     | 2.219139 | 0.00092  | 0.012171 |
| GP9     | 2.584706 | 0.00073  | 0.010325 |
| GPFR    | 3.041958 | 0.00335  | 0.028425 |
| GPI     | 2.022304 | 0.00662  | 0.044265 |
| GPR137  | 4.681595 | 5.00E-04 | 0.00807  |
| GPR137B | 4.447517 | 0.00027  | 0.00524  |
| GPR172A | 6.502525 | 0.00101  | 0.012919 |
| GPR35   | 5.223439 | 0.00017  | 0.003858 |
| GPR44   | 5.563528 | 0.00025  | 0.005017 |
| GPR84   | 2.979355 | 0.00044  | 0.007351 |
| GPX1    | 2.445281 | 0.00333  | 0.028292 |
| GRAMD1B | 6.906716 | 2.00E-05 | 0.00091  |
| GRAP2   | 2.863937 | 0.0077   | 0.049035 |
| GRB14   | 2.115502 | 0.00463  | 0.034899 |
| GRHPR   | 8.207825 | 0.00347  | 0.029077 |
| GRINA   | 7.878932 | 0        | 6.00E-06 |
| GRN     | 3.693529 | 1.00E-05 | 0.000712 |
| GRWD1   | 2.799172 | 0.0018   | 0.018637 |
| GSN     | 2.952629 | 0.00688  | 0.045486 |
| GSTO1   | 3.460547 | 0.00022  | 0.004571 |
| GSTZ1   | 2.854029 | 0        | 0.000174 |
| GTDC1   | 3.792108 | 0.00055  | 0.00857  |
| GTPBP1  | 2.762549 | 0.00031  | 0.005854 |
| GUCY1A3 |          | 0.00021  | 0.004432 |
| GUSB    | 3.472561 | 0.00205  | 0.026413 |
| GYG1    | 2.68887  | 0.00217  | 0.021032 |

|           |          |          |          |
|-----------|----------|----------|----------|
| GYS1      | 4.129594 | 0.00321  | 0.027589 |
| H1F0      | 2.687007 | 0.00342  | 0.028814 |
| H2AFJ     | 2.620787 | 0.00018  | 0.004012 |
| H3F3A     | 3.845044 | 0.00325  | 0.027841 |
| HAVCR2    | 2.950583 | 0.00096  | 0.012504 |
| HBA1      | 4.216366 | 0.00181  | 0.018728 |
| HBA2      | 3.721799 | 0.00262  | 0.024098 |
| HBB       | 3.97237  | 0.00055  | 0.008559 |
| HBD       | 2.713209 | 0.00609  | 0.041923 |
| HBG1      | 8.190775 | 0.00012  | 0.002994 |
| HBG2      | 2.205338 | 0.00048  | 0.007894 |
| HBQ1      | 4.67187  | 0.00013  | 0.003218 |
| HCFC1R1   | 4.490886 | 0.00025  | 0.005017 |
| HCST      | 20.74943 | 0.00488  | 0.036009 |
| HDAC10    | 11.18893 | 0        | 0.000128 |
| HEATR1    | 4.325899 | 0        | 0.00029  |
| HIP2      | 2.174977 | 0.00234  | 0.02219  |
| HIST1H1C  | 2.529759 | 0.005    | 0.03672  |
| HIST1H2AC | 5.359134 | 0.00552  | 0.039265 |
| HIST1H2AE | 4.945101 | 1.00E-05 | 0.000359 |
| HIST1H2AG | 14.08414 | 0.0066   | 0.044158 |
| HIST1H2BD | 7.245072 | 0        | 0.000322 |
| HIST1H2BE | 6.408559 | 7.00E-05 | 0.00208  |
| HIST1H2BG | 5.27072  | 0.00013  | 0.003123 |
| HIST1H2BH | 2.239226 | 7.00E-04 | 0.010163 |
| HIST1H2BJ | 3.65786  | 0.00525  | 0.037881 |
| HIST1H2BK | 2.521007 | 4.00E-05 | 0.00155  |
| HIST1H3F  | 2.475981 | 0.00665  | 0.04441  |
| HIST1H3H  | 2.316586 | 0.00508  | 0.037061 |
| HIST1H4H  | 4.836623 | 0.00146  | 0.016325 |
| HIST2H2AC | 8.681835 | 9.00E-05 | 0.002402 |
| HIST2H2BE | 2.019503 | 0.0013   | 0.015239 |
| HIST2H3C  | 4.064281 | 0.00138  | 0.015706 |
| HIST2H4A  | 2.425026 | 1.00E-05 | 0.000533 |
| HK1       | 2.321408 | 0.00023  | 0.004701 |
| HK3       | 6.13048  | 0.00792  | 0.049935 |
| HLX       | 4.893952 | 0.00624  | 0.042573 |
| HMGCL     | 3.955884 | 0.00047  | 0.007777 |
| HMOX1     | 3.89062  | 0.00427  | 0.033211 |
| HOMER2    | 10.73314 | 0.00133  | 0.015434 |
| HOXC6     | 5.130146 | 2.00E-05 | 0.000859 |

|         |          |          |          |
|---------|----------|----------|----------|
| HP      | 2.122846 | 0.00601  | 0.041416 |
| HPS6    | 2.27521  | 0.00173  | 0.018173 |
| HPSE    | 2.047694 | 0.00137  | 0.015655 |
| HSPBL2  | 2.479415 | 0.00183  | 0.018843 |
| HYAL2   | 9.29207  | 0.00222  | 0.021397 |
| HYAL3   | 2.414961 | 0        | 0.000176 |
| HYLS1   | 2.009728 | 0.00133  | 0.015377 |
| ICAM4   | 4.425989 | 0.0031   | 0.026898 |
| ICT1    | 6.164569 | 0.00174  | 0.018241 |
| IER5L   | 3.882538 | 0.0013   | 0.015156 |
| IFI27   | 2.45207  | 0.00486  | 0.035936 |
| IFI30   | 2.089272 | 0.006    | 0.041393 |
| IFI35   | 22.13105 | 0.00752  | 0.048284 |
| IFIT1   | 9.787904 | 0.00121  | 0.014516 |
| IFIT2   | 25.83043 | 9.00E-05 | 0.00239  |
| IFIT3   | 16.81877 | 4.00E-05 | 0.001321 |
| IFITM2  | 57.44064 | 0.00058  | 0.009002 |
| IFITM3  | 65.70813 | 0.00016  | 0.003609 |
| IFITM4P | 14.96998 | 0.00012  | 0.003024 |
| IFNGR2  | 3.716643 | 1.00E-05 | 0.000564 |
| IGF2BP2 | 2.586498 | 4.00E-05 | 0.001323 |
| IGFBP4  | 2.628063 | 0.00428  | 0.033258 |
| IGFBP7  | 2.131693 | 0.00054  | 0.008557 |
| IGSF2   | 2.080601 | 0.00757  | 0.048429 |
| IL15    | 3.538162 | 0.00479  | 0.035644 |
| IL15RA  | 8.224911 | 0.00287  | 0.025606 |
| IL17RA  | 4.484664 | 3.00E-05 | 0.001117 |
| IL1RN   | 3.698653 | 0.00057  | 0.008826 |
| IL2RG   | 5.456591 | 0        | 6.30E-05 |
| IL8RBP  | 3.160165 | 2.00E-04 | 0.004311 |
| ILK     | 2.076279 | 0.00752  | 0.048284 |
| IMPA2   | 5.021088 | 0.00206  | 0.020318 |
| INF2    | 2.661058 | 0.00033  | 0.006094 |
| INSL3   | 5.151527 | 0.00055  | 0.008642 |
| IP6K1   | 7.846232 | 0.00019  | 0.004117 |
| IRF2    | 10.40352 | 0.00035  | 0.006326 |
| IRF5    | 18.20168 | 0        | 7.00E-06 |
| IRX3    | 10.45412 | 0        | 8.00E-06 |
| ISOC2   | 2.749177 | 0        | 2.90E-05 |
| ITFG1   | 10.33166 | 0.00101  | 0.012947 |
| ITFG3   | 2.463996 | 6.00E-05 | 0.001794 |



|           |          |          |          |
|-----------|----------|----------|----------|
| ITGA2B    | 2.662903 | 0        | 0.000226 |
| ITGAM     | 4.401514 | 0.00432  | 0.033466 |
| ITGB3     | 4.87702  | 0.00337  | 0.028472 |
| ITGB5     | 3.668016 | 0.0042   | 0.032892 |
| ITLN1     | 2.538542 | 0.0038   | 0.030901 |
| ITPK1     | 9.107152 | 0.00596  | 0.041234 |
| IVD       | 5.14439  | 1.00E-05 | 0.000669 |
| JAK2      | 2.286277 | 1.00E-05 | 0.000662 |
| JAM3      | 2.68887  | 3.00E-05 | 0.001308 |
| JARID1C   | 6.788063 | 0.00046  | 0.007643 |
| JOSD2     | 2.297397 | 0.00172  | 0.018151 |
| KCNJ15    | 3.294364 | 0.00066  | 0.00969  |
| KCNJ2     | 2.350553 | 0.00032  | 0.00596  |
| KCNMA1    | 2.403272 | 0.00186  | 0.019025 |
| KCNMB1    | 3.688412 | 0.00093  | 0.012173 |
| KCTD21    | 5.105315 | 0.00017  | 0.003795 |
| KDEL2     | 2.231479 | 0        | 1.50E-05 |
| KEAP1     | 2.952629 | 0.00201  | 0.020007 |
| KIAA0040  | 2.505329 | 0.00052  | 0.008309 |
| KIAA0319L | 2.668446 | 0.00559  | 0.039566 |
| KIAA0460  | 4.65248  | 0.00311  | 0.026925 |
| KIAA0513  | 20.59183 | 1.00E-05 | 0.000658 |
| KIAA1539  | 3.640155 | 0.00183  | 0.018843 |
| KIAA1602  | 2.846127 | 0.00477  | 0.035602 |
| KIAA1618  | 5.45281  | 0.00049  | 0.008007 |
| KIAA2013  | 5.151527 | 0.00142  | 0.016038 |
| KIF1B     | 7.568461 | 7.00E-05 | 0.002036 |
| KIF2A     | 4.429058 | 0.00169  | 0.017975 |
| KIFC3     | 25.86627 | 0        | 3.60E-05 |
| KIR2DL1   | 2.66475  | 0        | 4.00E-05 |
| KIR2DS3   | 2.440201 | 0.00053  | 0.008429 |
| KIR2DS5   | 4.743658 | 0.00106  | 0.01336  |
| KIR3DL1   | 4.106758 | 0.00348  | 0.029113 |
| KIR3DL2   | 3.403455 | 5.00E-05 | 0.001748 |
| KIR3DL3   | 2.628063 | 1.00E-05 | 0.000405 |
| KLHDC8B   | 2.804999 | 0.00628  | 0.042779 |
| KLHL18    | 2.477697 | 0        | 0.00027  |
| KLHL5     | 2.375119 | 2.00E-05 | 0.001008 |
| KLHL9     | 2.283109 | 0.00611  | 0.042008 |
| KPNA6     | 5.112397 | 4.00E-04 | 0.006894 |
| KRT75     | 6.745849 | 0.00025  | 0.004983 |

|          |          |          |          |
|----------|----------|----------|----------|
| KRT8P9   | 2.205338 | 1.00E-05 | 0.000449 |
| KYNU     | 7.195026 | 0.00119  | 0.014403 |
| LAMP2    | 4.979497 | 0        | 0.000279 |
| LAP3     | 4.897346 | 0.00051  | 0.008201 |
| LAPTM4B  | 5.68831  | 9.00E-05 | 0.002472 |
| LCN2     | 2.159953 | 0.00039  | 0.006837 |
| LCP1     | 2.168955 | 0.00084  | 0.01142  |
| LGALS12  | 2.371829 | 0.0042   | 0.032918 |
| LGALS3BP | 3.714067 | 0.00091  | 0.012088 |
| LGALS9   | 4.662165 | 3.00E-05 | 0.001293 |
| LGALS9B  | 2.952629 | 0.00048  | 0.007828 |
| LHFPL2   | 3.582583 | 0.0014   | 0.015859 |
| LILRA6   | 3.401097 | 0.00344  | 0.028902 |
| LILRB2   | 4.87702  | 0.00301  | 0.026377 |
| LILRB4   | 72.10363 | 0.00287  | 0.025582 |
| LIMK1    | 3.092985 | 0        | 1.40E-05 |
| LMNA     | 3.231043 | 0.00085  | 0.011513 |
| LONRF1   | 8.901201 | 6.00E-05 | 0.00198  |
| LOXL3    | 3.231043 | 1.00E-05 | 0.000722 |
| LPAR5    | 4.601168 | 9.00E-05 | 0.002412 |
| LPCAT3   | 5.049008 | 1.00E-05 | 0.000578 |
| LPPR2    | 3.110184 | 0.00225  | 0.021544 |
| LRG1     | 2.77791  | 5.00E-05 | 0.001627 |
| LRP10    | 2.703822 | 0.0017   | 0.017975 |
| LRP3     | 2.319799 | 3.00E-05 | 0.001227 |
| LRRC25   | 2.076279 | 0.00012  | 0.003016 |
| LRRC28   | 2.844155 | 0.00149  | 0.016518 |
| LRRC33   | 2.199232 | 0.00044  | 0.007326 |
| LRRC42   | 7.775848 | 0.00661  | 0.044209 |
| LSP1     | 2.118437 | 0.00014  | 0.0034   |
| LST1     | 3.237769 | 0.00244  | 0.022877 |
| LTB4R    | 3.131817 | 0.00023  | 0.004704 |
| LTBR     | 2.852051 | 0.00011  | 0.00293  |
| LY6E     | 2.783693 | 0.00121  | 0.014538 |
| LY6G5C   | 3.545527 | 0.00019  | 0.004222 |
| LY6G6F   | 3.487033 | 0.00355  | 0.029492 |
| LYN      | 2.016705 | 6.00E-05 | 0.001824 |
| LYPD1    | 2.228387 | 0.00025  | 0.004983 |
| LZTS2    | 3.361255 | 0.0019   | 0.019321 |
| MAFB     | 3.294364 | 0.0043   | 0.033406 |
| MAGED2   | 2.20381  | 2.00E-05 | 0.001033 |

|           |          |          |          |
|-----------|----------|----------|----------|
| MANBAL    | 2.1206   | 3.00E-05 | 0.001204 |
| MAP1A     | 2.668446 | 1.00E-05 | 0.000468 |
| MAP1LC3A  | 5.007186 | 4.00E-05 | 0.001313 |
| MAP1S     | 3.058873 | 5.00E-05 | 0.001606 |
| MAP3K11   | 3.24226  | 0.00017  | 0.003937 |
| MAP3K7IP1 | 2.718856 | 0.00016  | 0.00368  |
| MAPK1     | 2.240778 | 0        | 1.40E-05 |
| MAPK14    | 2.140577 | 0        | 9.00E-06 |
| MAPK3     | 3.129647 | 0.00012  | 0.003024 |
| MAPK7     | 10.27453 | 0        | 4.90E-05 |
| MAPRE3    | 9.513657 | 0.00016  | 0.003609 |
| MAX       | 2.995922 | 1.00E-05 | 0.000603 |
| MAZ       | 2.521007 | 3.00E-05 | 0.001291 |
| MBNL3     | 2.465705 | 8.00E-05 | 0.00228  |
| MCAT      | 2.557971 | 0        | 3.60E-05 |
| MCM6      | 2.214529 | 0        | 7.30E-05 |
| MCOLN1    | 2.720742 | 0        | 0        |
| MCTP1     | 2.200757 | 0        | 5.00E-05 |
| MEA1      | 6.520579 | 0        | 5.00E-06 |
| MED12     | 4.85678  | 0.00012  | 0.003021 |
| MED15     | 4.853414 | 0        | 4.00E-06 |
| MED17     | 2.581125 | 0.00045  | 0.00755  |
| MED20     | 2.194664 | 0        | 4.00E-05 |
| MED25     | 2.747272 | 4.00E-05 | 0.001321 |
| MED8      | 2.508804 | 0        | 0        |
| MEIS1     | 5.609997 | 0        | 1.00E-06 |
| MEN1      | 2.897884 | 0.00698  | 0.045993 |
| MESDC1    | 2.536783 | 0.00121  | 0.014516 |
| METRNL    | 3.294364 | 1.00E-05 | 0.000369 |
| METTL7B   | 2.185555 | 0        | 2.00E-05 |
| MFAP1     | 4.307946 | 0        | 0.000128 |
| MFAP3L    | 3.020945 | 0.00183  | 0.018843 |
| MFSD5     | 2.019503 | 0        | 5.00E-06 |
| MFSD6     | 5.505982 | 0.00264  | 0.024163 |
| MGAT1     | 2.510544 | 0        | 1.40E-05 |
| MGAT4B    | 2.581125 | 2.00E-05 | 0.00074  |
| MGC13005  | 4.228072 | 0        | 8.00E-06 |
| MGC13057  | 5.966976 | 0.00058  | 0.009002 |
| MGC20983  | 4.883786 | 0        | 5.80E-05 |
| MGC4677   | 2.306971 | 9.00E-05 | 0.00251  |
| MGC70857  | 2.223758 | 0        | 4.50E-05 |

|          |          |          |          |
|----------|----------|----------|----------|
| MGC71993 | 3.078014 | 2.00E-05 | 0.000834 |
| MGLL     | 5.91345  | 0        | 1.20E-05 |
| MGRN1    | 8.3861   | 1.00E-05 | 0.000564 |
| MGST1    | 2.840215 | 2.00E-05 | 0.000804 |
| MICALL1  | 5.183764 | 0        | 0.000322 |
| MICB     | 3.969617 | 0        | 0.000249 |
| MIER1    | 3.595021 | 0        | 8.00E-05 |
| MIER2    | 4.106758 | 0        | 5.80E-05 |
| MINK1    | 2.566852 | 1.00E-05 | 0.000606 |
| MIR1974  | 2.009728 | 0.00485  | 0.03587  |
| MIR1978  | 3.77637  | 2.00E-05 | 0.001019 |
| MIR223   | 5.763719 | 4.00E-05 | 0.001362 |
| MIR574   | 4.132458 | 0        | 0.000146 |
| MIR586   | 2.622604 | 0        | 0.000174 |
| MLST8    | 5.832038 | 1.00E-05 | 0.000665 |
| MLYCD    | 2.617156 | 0        | 3.10E-05 |
| MMD      | 4.231004 | 0        | 2.00E-05 |
| MMP25    | 11.26675 | 0        | 7.40E-05 |
| MMP9     | 3.545527 | 0        | 2.00E-06 |
| MMRN1    | 2.371829 | 0        | 6.00E-06 |
| MNT      | 3.6782   | 0        | 4.00E-05 |
| MOBK1B   | 4.310933 | 0.00125  | 0.014821 |
| MOSC1    | 2.844155 | 0        | 0.000314 |
| MOSPD3   | 3.384634 | 0.00011  | 0.002914 |
| MPL      | 3.866424 | 0.00013  | 0.00317  |
| MPND     | 2.291036 | 0        | 0.00029  |
| MPP1     | 7.270225 | 0        | 0        |
| MPV17L2  | 3.310387 | 0        | 0.000123 |
| MPZL1    | 7.402435 | 9.00E-05 | 0.002553 |
| MRPL2    | 10.18236 | 0        | 4.20E-05 |
| MRPL27   | 7.840795 | 2.00E-05 | 0.000859 |
| MRPS12   | 4.18144  | 0        | 0.000112 |
| MS4A3    | 18.83051 | 0        | 2.90E-05 |
| MS4A4A   | 2.181015 | 0        | 7.00E-06 |
| MS4A7    | 2.097979 | 6.00E-05 | 0.001794 |
| MSC      | 2.348924 | 3.00E-05 | 0.001261 |
| MSRB2    | 2.234574 | 9.00E-05 | 0.00249  |
| MSRB3    | 2.964934 | 0        | 0.000113 |
| MT1A     | 3.582583 | 2.00E-05 | 0.001019 |
| MT1E     | 4.245693 | 5.00E-04 | 0.008081 |
| MT2A     | 3.382289 | 9.00E-05 | 0.00239  |

|         |          |          |          |
|---------|----------|----------|----------|
| MTE     | 3.160165 | 0.00131  | 0.015251 |
| MTF1    | 6.2941   | 0        | 0.000108 |
| MTFR1   | 5.559673 | 0        | 1.10E-05 |
| MTHFD1  | 5.775717 | 7.00E-05 | 0.002103 |
| MTMR14  | 4.325899 | 0.00201  | 0.019987 |
| MTMR3   | 2.121375 | 3.00E-05 | 0.001291 |
| MTRF1L  | 3.904127 | 0        | 0.00017  |
| MTSS1   | 4.617142 | 0.00037  | 0.006595 |
| MUL1    | 3.747686 | 0        | 0.000261 |
| MXD1    | 6.448663 | 1.00E-05 | 0.000681 |
| MYD88   | 5.676493 | 0        | 0.000176 |
| MYL6    | 3.2898   | 5.00E-05 | 0.001748 |
| MYL9    | 2.86791  | 0.00212  | 0.020756 |
| MYLK    | 5.017609 | 0        | 1.70E-05 |
| MYO1C   | 2.488023 | 1.00E-05 | 0.000669 |
| MYO7A   | 4.962269 | 1.00E-05 | 0.000663 |
| MYOF    | 2.975228 | 7.00E-05 | 0.001991 |
| NACA2   | 4.307946 | 0        | 8.00E-06 |
| NACC1   | 3.123146 | 0        | 7.40E-05 |
| NAGPA   | 2.337554 | 0        | 8.00E-05 |
| NAPA    | 3.724379 | 1.00E-05 | 0.000722 |
| NAT15   | 3.351949 | 0.00032  | 0.00595  |
| NAT8B   | 2.648178 | 6.00E-05 | 0.001853 |
| NBAS    | 3.668016 | 0        | 0.000265 |
| NCOA4   | 5.836081 | 0        | 0.000115 |
| NDUFAF3 | 3.129647 | 7.00E-05 | 0.002106 |
| NDUFV2  | 2.928171 | 0.0013   | 0.015239 |
| NEFH    | 7.300524 | 0.00024  | 0.004858 |
| NEU1    | 3.326488 | 1.00E-04 | 0.00264  |
| NEXN    | 2.581125 | 1.00E-05 | 0.000663 |
| NFATC1  | 5.876675 | 8.00E-05 | 0.002348 |
| NFE2    | 3.006323 | 6.00E-05 | 0.001944 |
| NFIB    | 2.60991  | 1.00E-05 | 0.000679 |
| NFIC    | 4.556734 | 0.00059  | 0.00903  |
| NFKB2   | 2.310172 | 3.00E-05 | 0.001204 |
| NFKBIB  | 2.6926   | 3.00E-05 | 0.001117 |
| NFKBIE  | 4.873641 | 2.00E-05 | 0.000808 |
| NGFRAP1 | 4.260433 | 0        | 6.00E-06 |
| NINJ2   | 3.547985 | 0.00049  | 0.008022 |
| NLRC4   | 2.016705 | 0.00048  | 0.007894 |
| NLRP12  | 4.355988 | 1.00E-05 | 0.000567 |

|         |          |          |          |
|---------|----------|----------|----------|
| NLRP3   | 3.18877  | 0        | 8.60E-05 |
| NLRX1   | 4.665397 | 0.00115  | 0.014076 |
| NME4    | 4        | 4.00E-05 | 0.001418 |
| NOC4L   | 3.246758 | 0.00225  | 0.021569 |
| NOMO2   | 3.264812 | 3.00E-05 | 0.001266 |
| NP      | 3.610003 | 0.00181  | 0.018704 |
| NPEPPS  | 4.061464 | 0        | 0.000137 |
| NPL     | 2.209929 | 0.00068  | 0.009968 |
| NQO2    | 5.559673 | 1.00E-05 | 0.000712 |
| NR1I2   | 2.810837 | 0.00012  | 0.003076 |
| NRBF2   | 2.226843 | 0.00035  | 0.006326 |
| NRBP1   | 3.797368 | 0.00042  | 0.007099 |
| NRGN    | 2.118437 | 1.00E-05 | 0.000565 |
| NRM     | 4.030615 | 0.00503  | 0.036819 |
| NSDHL   | 5.183764 | 0        | 3.60E-05 |
| NT5DC2  | 3.518596 | 0.00063  | 0.00942  |
| NT5M    | 3.936736 | 0.00014  | 0.0034   |
| NUCB1   | 24.42015 | 4.00E-05 | 0.001341 |
| NUDT18  | 7.500569 | 0        | 9.00E-06 |
| NUDT5   | 2.604488 | 0        | 3.00E-06 |
| NUP214  | 3.24901  | 0.00551  | 0.039244 |
| OAF     | 2.134651 | 3.00E-04 | 0.005711 |
| OAS1    | 5.194554 | 0.00169  | 0.017975 |
| OAS2    | 2.842184 | 0.00027  | 0.005249 |
| OAS3    | 12.295   | 0.00186  | 0.019022 |
| OASL    | 10.87543 | 0        | 0.00023  |
| OBFC2B  | 3.877159 | 9.00E-05 | 0.002445 |
| ODF3B   | 2.097979 | 0.00069  | 0.010048 |
| OGDH    | 2.022304 | 0.00012  | 0.002935 |
| OLFML2B | 3.235525 | 0.00055  | 0.00857  |
| OPLAH   | 4.01667  | 0.001    | 0.012801 |
| ORAI2   | 2.237674 | 1.00E-05 | 0.000468 |
| ORM1    | 4.665397 | 1.00E-05 | 0.000708 |
| OSBP2   | 5.5098   | 0        | 0.000114 |
| OSCAR   | 2.922089 | 0        | 4.40E-05 |
| OXER1   | 2.111107 | 0        | 1.00E-06 |
| OXTR    | 7.007987 | 7.00E-05 | 0.00208  |
| P2RX1   | 2.087824 | 0        | 3.00E-06 |
| P2RX7   | 3.665475 | 0.00071  | 0.010184 |
| P2RY13  | 8.730111 | 0        | 0.000279 |
| P4HB    | 7.265187 | 0.00404  | 0.032067 |

|          |          |          |          |
|----------|----------|----------|----------|
| P704P    | 6.736504 | 0.00103  | 0.01307  |
| P76      | 2.844155 | 0.00574  | 0.040248 |
| PA2G4    | 3.031433 | 7.00E-05 | 0.001991 |
| PACS1    | 6.988583 | 1.00E-05 | 0.000383 |
| PACSN2   | 2.066229 | 1.00E-04 | 0.00264  |
| PADI4    | 2.703822 | 0        | 0.000192 |
| PAK1     | 4.254531 | 0.00469  | 0.035223 |
| PAQR4    | 4.658934 | 0.00093  | 0.012243 |
| PARP9    | 3.453358 | 0.0011   | 0.013725 |
| PARVB    | 3.786855 | 7.00E-05 | 0.002073 |
| PCBD1    | 2.599078 | 0.0077   | 0.049035 |
| PCDHGB6  | 2.334316 | 0        | 0.000161 |
| PCGF1    | 3.708922 | 0.00263  | 0.024128 |
| PCIF1    | 2.690734 | 4.00E-05 | 0.001489 |
| PCK2     | 4.075565 | 0.00172  | 0.018151 |
| PCSK6    | 2.590086 | 0.00446  | 0.034173 |
| PCTK3    | 2.436821 | 1.00E-05 | 0.000449 |
| PDCD1    | 2.31498  | 0.00015  | 0.003529 |
| PDE5A    | 2.593679 | 1.00E-05 | 0.000668 |
| PDGFRB   | 5.708058 | 0.00022  | 0.004569 |
| PDLIM1   | 4.509602 | 0        | 4.00E-06 |
| PDLIM7   | 4.398465 | 0.00237  | 0.022363 |
| PDZK1IP1 | 3.773753 | 6.00E-05 | 0.001869 |
| PECAM1   | 2.302179 | 2.00E-05 | 0.000789 |
| PEF1     | 2.51926  | 1.00E-05 | 0.000502 |
| PELO     | 5.892991 | 0.00147  | 0.016432 |
| PEMT     | 3.786855 | 0.00023  | 0.004804 |
| PEPD     | 3.67056  | 0.00284  | 0.025402 |
| PF4      | 3.6782   | 0.00017  | 0.003858 |
| PF4V1    | 3.821132 | 0.00763  | 0.048683 |
| PFKFB4   | 3.716643 | 0.00264  | 0.024163 |
| PFKL     | 6.448663 | 0.00119  | 0.014382 |
| PFTK1    | 2.399943 | 8.00E-05 | 0.002317 |
| PGA3     | 2.629886 | 0.002    | 0.01989  |
| PGD      | 6.413003 | 0.00013  | 0.003123 |
| PGLYRP1  | 2.901904 | 1.00E-05 | 0.000363 |
| PGM2     | 4.152557 | 2.00E-05 | 0.000812 |
| PGRMC1   | 2.430074 | 1.00E-04 | 0.002686 |
| PHCA     | 3.698653 | 1.00E-05 | 0.000396 |
| PHF13    | 5.81186  | 0.00111  | 0.013822 |
| PHF19    | 3.673105 | 0.00048  | 0.007893 |

|         |          |          |          |
|---------|----------|----------|----------|
| PIK3R4  | 4.707627 | 0.00338  | 0.028568 |
| PILRA   | 2.96288  | 0        | 9.00E-05 |
| PIP5K1C | 2.046275 | 0.00525  | 0.03789  |
| PITPNM1 | 2.45207  | 0.0013   | 0.015156 |
| PKM2    | 2.911979 | 0        | 0.000285 |
| PKN1    | 3.052518 | 0.00624  | 0.042573 |
| PLA2G15 | 4.11816  | 0.00222  | 0.021379 |
| PLA2G4C | 3.00424  | 0.0026   | 0.023982 |
| PLAGL2  | 9.208716 | 0.00061  | 0.009193 |
| PLB1    | 8.168097 | 0.00216  | 0.020987 |
| PLCG2   | 2.899894 | 0.00505  | 0.036928 |
| PLD1    | 3.037743 | 0.00012  | 0.003043 |
| PLEKHO2 | 3.377604 | 3.00E-04 | 0.00573  |
| PLOD3   | 2.139094 | 0.00313  | 0.027088 |
| PLTP    | 2.355446 | 9.00E-05 | 0.002496 |
| PLXDC2  | 2.332699 | 3.00E-05 | 0.001268 |
| PLXNB2  | 5.180172 | 0.00187  | 0.019124 |
| PLXNB3  | 6.00848  | 2.00E-05 | 0.000786 |
| PNKD    | 2.646343 | 0.00086  | 0.011606 |
| PNMA1   | 2.212995 | 0.00419  | 0.032869 |
| PNPLA2  | 4.447517 | 0.00147  | 0.016432 |
| POLDIP3 | 3.89062  | 3.00E-05 | 0.001112 |
| POLR2A  | 8.213516 | 0.00071  | 0.010204 |
| POR     | 4.829922 | 0.00671  | 0.044691 |
| POTEF   | 2.779836 | 3.00E-05 | 0.001082 |
| POU2F2  | 2.718856 | 5.00E-05 | 0.001665 |
| PPARG   | 3.084422 | 0.00436  | 0.033627 |
| PPBP    | 7.320793 | 0.00072  | 0.010304 |
| PPDPF   | 2.114036 | 0.0012   | 0.014443 |
| PPIL5   | 3.18877  | 4.00E-05 | 0.001355 |
| PPM1D   | 4.846691 | 0.00349  | 0.029168 |
| PPP1R3D | 3.424753 | 0.00537  | 0.038517 |
| PPP2R1A | 2.579337 | 0.00113  | 0.013921 |
| PPP2R4  | 3.394032 | 0.00035  | 0.006286 |
| PRAM1   | 2.008335 | 0        | 6.00E-06 |
| PRDX6   | 3.02304  | 0        | 0.000128 |
| PRELID1 | 2.108183 | 5.00E-05 | 0.001651 |
| PRKCD   | 3.092985 | 0.00136  | 0.015574 |
| PRMT7   | 3.301222 | 0.00036  | 0.00642  |
| PROS1   | 2.472551 | 0.00756  | 0.048384 |
| PRPF8   | 3.027234 | 0        | 0.000146 |



|           |          |          |          |
|-----------|----------|----------|----------|
| PRRT3     | 8        | 0.00039  | 0.006837 |
| PRUNE     | 28.80006 | 0        | 0.000239 |
| PSAT1     | 2.911979 | 0        | 0.000319 |
| PSEN2     | 3.745089 | 0.00092  | 0.012171 |
| PSENEEN   | 2.536783 | 0        | 1.00E-06 |
| PSRC1     | 3.114499 | 0.00309  | 0.026838 |
| PTAFR     | 2.475981 | 0.00407  | 0.032202 |
| PTCRA     | 4.829922 | 0        | 1.40E-05 |
| PTGIR     | 2.559745 | 0        | 0.000156 |
| PTGS1     | 2.51926  | 0.00043  | 0.007262 |
| PTK2      | 2.148009 | 0        | 9.60E-05 |
| PTK2B     | 3.680751 | 0.00044  | 0.007351 |
| PTMS      | 7.003131 | 0.00124  | 0.014721 |
| PTPN23    | 2.206867 | 0.002    | 0.01989  |
| PTPN6     | 2.8481   | 0.00114  | 0.014027 |
| PTPRA     | 4.432129 | 0.00729  | 0.047312 |
| PTPRN     | 8.202138 | 0.00333  | 0.028267 |
| PTPRO     | 3.082284 | 3.00E-05 | 0.00122  |
| PTRH2     | 2.563296 | 0        | 8.60E-05 |
| PTTG1IP   | 2.05908  | 0.00032  | 0.00595  |
| PVALB     | 3.020945 | 0.00045  | 0.007533 |
| PVRL2     | 2.409945 | 2.00E-04 | 0.004311 |
| PWWP2     | 7.190041 | 0.00142  | 0.016038 |
| PWWP2B    | 28.18782 | 0.00103  | 0.013075 |
| PYCARD    | 2.642677 | 0.00019  | 0.004192 |
| PYGL      | 5.263418 | 0.00739  | 0.047706 |
| QPCT      | 3.431882 | 1.00E-05 | 0.000359 |
| QPRT      | 2.16595  | 0        | 0.000304 |
| QSOX1     | 2.170459 | 0.00147  | 0.016432 |
| RAB11FIP1 | 2.206867 | 0        | 0.000256 |
| RAB13     | 4.779965 | 1.00E-04 | 0.002589 |
| RAB1B     | 3.26255  | 0.00213  | 0.020766 |
| RAB31     | 2.87388  | 0.00076  | 0.010631 |
| RAB32     | 3.434262 | 7.00E-04 | 0.010163 |
| RAB37     | 3.324183 | 0.00471  | 0.035303 |
| RAB5C     | 2.496661 | 0        | 0.00027  |
| RAB6A     | 2.493202 | 0        | 0.00012  |
| RAB8A     | 2.491475 | 0.00161  | 0.017407 |
| RAC1      | 2.488023 | 0.00722  | 0.047069 |
| RACGAP1   | 2.488023 | 0.00025  | 0.005017 |
| RANBP3    | 2.488023 | 0.00014  | 0.003408 |

|               |          |          |          |
|---------------|----------|----------|----------|
| RARA          | 2.488023 | 0        | 0.000304 |
| RASGRP4       | 2.482855 | 4.00E-05 | 0.001337 |
| RAVER1        | 2.481135 | 0.0029   | 0.025806 |
| RBCK1         | 2.481135 | 0.00068  | 0.009995 |
| RBM18         | 2.479415 | 0.00505  | 0.036928 |
| RBM42         | 2.479415 | 0.00176  | 0.018425 |
| RBM47         | 2.477697 | 0        | 7.00E-06 |
| RBPS2         | 2.477697 | 4.00E-05 | 0.001455 |
| RC3H2         | 2.475981 | 0.00081  | 0.011153 |
| RENBP         | 2.475981 | 0.00019  | 0.004117 |
| REPS2         | 2.475981 | 7.00E-05 | 0.002036 |
| RGL1          | 2.472551 | 0.00012  | 0.002962 |
| RGS18         | 2.469125 | 1.00E-05 | 0.000662 |
| RHBDD1        | 2.469125 | 0.00154  | 0.016908 |
| RHBDD3        | 2.467414 | 0.00601  | 0.041416 |
| RHOBTB1       | 2.467414 | 0.00329  | 0.028048 |
| RHOC          | 2.465705 | 0.00025  | 0.004983 |
| RHOG          | 2.465705 | 0        | 1.50E-05 |
| RIN1          | 2.463996 | 0.00097  | 0.012537 |
| RIN2          | 4.416795 | 7.00E-05 | 0.002005 |
| RIT1          | 2.488023 | 0.00076  | 0.010612 |
| RMI1          | 2.268911 | 6.00E-04 | 0.009119 |
| RMND5B        | 3.193194 | 0.00091  | 0.012102 |
| RNASE1        | 7.819086 | 0        | 6.00E-06 |
| RNASE2        | 2.547355 | 0.00225  | 0.021544 |
| RNASE3        | 2.170459 | 5.00E-05 | 0.001699 |
| RNASE4        | 7.120606 | 0        | 2.60E-05 |
| RNASEH2A      | 3.114499 | 0.00033  | 0.006094 |
| RNF135        | 2.450371 | 7.00E-05 | 0.00208  |
| RNF149        | 3.303511 | 0.00017  | 0.003839 |
| RNF185        | 2.150989 | 6.00E-05 | 0.001952 |
| RNF19B        | 3.538162 | 0.00013  | 0.003164 |
| RNF213        | 3.231043 | 0.00051  | 0.008201 |
| RNF24         | 2.620787 | 0.00374  | 0.03061  |
| RNY1          | 2.467414 | 0.00305  | 0.026645 |
| ROPN1L        | 2.12874  | 0.00035  | 0.006351 |
| RP11-529I10.4 | 2.159953 | 0.00078  | 0.010774 |
| RPL23AP13     | 2.728296 | 0.0066   | 0.044158 |
| RPL31P10      | 2.278367 | 3.00E-05 | 0.001119 |
| RPL39L        | 3.673105 | 2.00E-05 | 0.000839 |
| RPN1          | 2.752991 | 0        | 0.000179 |

|          |          |          |          |
|----------|----------|----------|----------|
| RPP25    | 2.32624  | 1.00E-05 | 0.000419 |
| RRAGD    | 30.06473 | 0.00136  | 0.015574 |
| RRAS     | 29.60974 | 0.00201  | 0.020013 |
| RRBP1    | 29.18186 | 1.00E-05 | 0.000643 |
| RRM2     | 28.80006 | 9.00E-05 | 0.002472 |
| RTN2     | 28.18782 | 0.00047  | 0.007777 |
| RTN3     | 27.43603 | 8.00E-05 | 0.002287 |
| RTP4     | 25.93808 | 6.00E-05 | 0.001944 |
| RUFY1    | 25.86627 | 0.0042   | 0.032892 |
| RUNDC1   | 25.83043 | 0.00287  | 0.025582 |
| RYR1     | 24.42015 | 0.00528  | 0.038004 |
| S100A11  | 24.42015 | 3.00E-05 | 0.001054 |
| S100A12  | 23.96737 | 0.00415  | 0.032659 |
| S100P    | 22.13105 | 0.00014  | 0.003311 |
| SAC3D1   | 21.55574 | 0.00465  | 0.034988 |
| SAMD14   | 21.30323 | 0.00224  | 0.021478 |
| SAMD4A   | 20.74943 | 1.00E-05 | 0.000363 |
| SAMD4B   | 20.59183 | 9.00E-05 | 0.002402 |
| SAPS1    | 19.83532 | 0.00171  | 0.018088 |
| SAR1B    | 19.3063  | 0.00082  | 0.011215 |
| SART3    | 18.94835 | 0.00062  | 0.009306 |
| SASH3    | 18.83051 | 0.00024  | 0.004902 |
| SBNO2    | 18.20168 | 0        | 6.00E-06 |
| SCARB2   | 16.81877 | 0.00018  | 0.003952 |
| SCD      | 16.79547 | 0.00062  | 0.009324 |
| SCGB1C1  | 16.18965 | 0.00124  | 0.014757 |
| SCLY     | 15.21055 | 8.00E-05 | 0.002307 |
| SDCBP    | 15.11595 | 0        | 0.000282 |
| SDPR     | 15.01154 | 0.00029  | 0.005627 |
| SEC14L1  | 14.96998 | 0.00389  | 0.031398 |
| SEC14L5  | 14.65174 | 1.00E-05 | 0.000681 |
| SELP     | 14.08414 | 0        | 7.90E-05 |
| SELT     | 14.01597 | 0.00048  | 0.007865 |
| SEMA4A   | 13.90951 | 0        | 0.000202 |
| SEMA4B   | 13.89987 | 0.00348  | 0.029113 |
| SEPHS2   | 13.85179 | 0.00052  | 0.008309 |
| SEPN1    | 13.46367 | 0.00014  | 0.003261 |
| SEPX1    | 12.90627 | 0.00732  | 0.04745  |
| SERPINA1 | 12.64943 | 0.00053  | 0.008429 |
| SERPINB1 | 12.295   | 0.00015  | 0.003533 |
| SERPING1 | 12.20161 | 0.00056  | 0.008681 |

|            |          |          |          |
|------------|----------|----------|----------|
| SETD1A     | 12.09216 | 2.00E-05 | 0.000898 |
| SFRS15     | 12.00863 | 0.00153  | 0.016848 |
| SFT2D2     | 11.98369 | 0.00092  | 0.012173 |
| SFXN5      | 11.81052 | 0        | 0.000295 |
| SGPL1      | 11.78598 | 3.00E-04 | 0.005733 |
| SGTA       | 11.75335 | 0.00044  | 0.007402 |
| SH2D3C     | 11.53543 | 0.00027  | 0.00524  |
| SH3BGRL2   | 11.50349 | 0.00025  | 0.005017 |
| SH3BGRL3   | 11.49552 | 0        | 1.40E-05 |
| SH3BP1     | 11.26675 | 0.00018  | 0.004087 |
| SH3BP5L    | 11.22777 | 0.00663  | 0.044336 |
| SH3PXD2B   | 11.18893 | 0.00048  | 0.007828 |
| SHC1       | 11.08856 | 0        | 0.000163 |
| SHKBP1     | 10.98909 | 0.00045  | 0.007548 |
| SIAH2      | 10.87543 | 1.00E-05 | 0.000658 |
| SIGLEC10   | 10.7704  | 0.00102  | 0.012947 |
| SIGLEC5    | 10.73314 | 2.00E-05 | 0.000882 |
| SIGLEC7    | 10.659   | 0.0048   | 0.035695 |
| SIGLEC9    | 10.45412 | 0.00012  | 0.002963 |
| SIL1       | 10.40352 | 0.00185  | 0.018975 |
| SIRPA      | 10.33166 | 0        | 5.80E-05 |
| SIRPB1     | 10.27453 | 0.00025  | 0.005069 |
| SIRT2      | 10.18236 | 0        | 0.000156 |
| SKA2       | 10.11904 | 0.00025  | 0.004977 |
| SLA        | 10.0005  | 0.00611  | 0.042008 |
| SLA2       | 9.917662 | 0.00022  | 0.004602 |
| SLAMF7     | 9.787904 | 2.00E-05 | 0.001022 |
| SLC10A3    | 9.693381 | 5.00E-05 | 0.001657 |
| SLC16A3    | 9.673245 | 1.00E-05 | 0.000578 |
| SLC1A5     | 9.619754 | 0.00053  | 0.008429 |
| SLC22A18AS | 9.513657 | 0.00309  | 0.026838 |
| SLC24A3    | 9.513657 | 0        | 0.000164 |
| SLC24A4    | 9.467608 | 9.00E-05 | 0.002464 |
| SLC25A11   | 9.454492 | 0.00029  | 0.005614 |
| SLC29A1    | 9.434853 | 0.00015  | 0.003494 |
| SLC29A3    | 9.330795 | 0        | 0.000203 |
| SLC31A2    | 9.298513 | 0.00045  | 0.007526 |
| SLC35D2    | 9.29207  | 8.00E-05 | 0.002316 |
| SLC37A1    | 9.259922 | 1.00E-05 | 0.000395 |
| SLC38A10   | 9.208716 | 0.00488  | 0.036009 |
| SLC39A11   | 9.13877  | 6.00E-05 | 0.001893 |

|          |          |          |          |
|----------|----------|----------|----------|
| SLC39A14 | 9.107152 | 0.00057  | 0.008826 |
| SLC39A3  | 9.107152 | 0        | 3.80E-05 |
| SLC40A1  | 9.081937 | 2.00E-05 | 0.000952 |
| SLC43A3  | 9.044245 | 0.00636  | 0.043144 |
| SLC45A3  | 9.019203 | 0.0016   | 0.017274 |
| SLC4A2   | 8.913549 | 3.00E-05 | 0.001204 |
| SLC6A12  | 8.901201 | 0.00637  | 0.043192 |
| SLC7A3   | 8.851979 | 0        | 0.000128 |
| SLC7A7   | 8.809133 | 0.00021  | 0.004509 |
| SLC9A1   | 8.748284 | 0.00101  | 0.012919 |
| SLC9A4   | 8.730111 | 0.00038  | 0.006712 |
| SLC9A9   | 8.693879 | 0.00012  | 0.003053 |
| SLFN11   | 8.681835 | 0.00135  | 0.015517 |
| SLITRK4  | 8.681835 | 0        | 3.60E-05 |
| SMARCC2  | 8.597993 | 0.00187  | 0.019092 |
| SMARCD3  | 8.56231  | 0.00174  | 0.018241 |
| SMOX     | 8.479622 | 0.0057   | 0.040075 |
| SMPD1    | 8.479622 | 0.00707  | 0.046385 |
| SMPD2    | 8.456144 | 0.00337  | 0.028472 |
| SMPDL3A  | 8.3861   | 0        | 4.50E-05 |
| SMTN     | 8.299359 | 0.00017  | 0.003768 |
| SNCA     | 8.224911 | 0.00327  | 0.027968 |
| SNN      | 8.213516 | 0.00366  | 0.03007  |
| SNORD48  | 8.207825 | 0.00028  | 0.005447 |
| SNORD95  | 8.202138 | 0.00311  | 0.026925 |
| SNX11    | 8.190775 | 0.00027  | 0.005269 |
| SNX17    | 8.168097 | 0.00234  | 0.02219  |
| SNX8     | 8.162437 | 0.00033  | 0.006094 |
| SOD2     | 8.1173   | 0.00132  | 0.015358 |
| SORT1    | 8.106055 | 6.00E-05 | 0.001968 |
| SP2      | 8.016653 | 0.00174  | 0.018305 |
| SPA17    | 8.011098 | 0        | 1.00E-06 |
| SPARC    | 8.005547 | 0.00031  | 0.005804 |
| SPATS2L  | 8        | 4.00E-05 | 0.001341 |
| SPHK1    | 7.889862 | 0.00142  | 0.015964 |
| SPI1     | 7.878932 | 1.00E-05 | 0.000533 |
| SPOCD1   | 7.857117 | 0.00128  | 0.015032 |
| SPRYD4   | 7.846232 | 0.00662  | 0.044264 |
| SPTLC2   | 7.846232 | 0.00138  | 0.015706 |
| SRC      | 7.840795 | 0        | 0.000197 |
| SRCAP    | 7.840795 | 0        | 0.000172 |

|         |          |          |          |
|---------|----------|----------|----------|
| SREBF1  | 7.819086 | 0.00128  | 0.015085 |
| SRM     | 7.792034 | 0.00022  | 0.004592 |
| SRXN1   | 7.775848 | 0.00015  | 0.003477 |
| SSSCA1  | 7.743576 | 0.00012  | 0.003029 |
| ST14    | 7.738211 | 0.00431  | 0.033409 |
| ST7     | 7.69542  | 0.00383  | 0.031071 |
| ST8SIA4 | 7.658172 | 0.00196  | 0.019673 |
| STAB1   | 7.594737 | 1.00E-05 | 0.000669 |
| STARD8  | 7.568461 | 0.00082  | 0.011192 |
| STAT1   | 7.521394 | 0.00182  | 0.018748 |
| STBD1   | 7.510974 | 0.00262  | 0.024098 |
| STEAP3  | 7.500569 | 0.00066  | 0.009684 |
| STK10   | 7.417844 | 0.00133  | 0.015434 |
| STK40   | 7.402435 | 4.00E-05 | 0.001557 |
| STOM    | 7.320793 | 0.00018  | 0.004058 |
| STRN4   | 7.310652 | 0.00072  | 0.010294 |
| STX1A   | 7.305586 | 0.00316  | 0.02727  |
| STX5    | 7.300524 | 0.00721  | 0.04704  |
| STXBP2  | 7.29041  | 0.00759  | 0.048483 |
| SUPT6H  | 7.275266 | 0.00016  | 0.003718 |
| SUSD1   | 7.270225 | 0.00059  | 0.009119 |
| SYK     | 7.265187 | 0.00156  | 0.017062 |
| SYMPK   | 7.245072 | 0.00077  | 0.01072  |
| SYNM    | 7.240052 | 0        | 2.60E-05 |
| SYTL4   | 7.210004 | 0.00394  | 0.031611 |
| SYVN1   | 7.195026 | 0.00374  | 0.030606 |
| TACO1   | 7.190041 | 0.0028   | 0.025141 |
| TADA3   | 7.145327 | 0.00342  | 0.028814 |
| TAF10   | 7.120606 | 0        | 0.000117 |
| TAGLN   | 7.09597  | 0.00039  | 0.006771 |
| TAL1    | 7.076323 | 1.00E-05 | 0.000548 |
| TALDO1  | 7.032316 | 0.00208  | 0.020484 |
| TAOK2   | 7.007987 | 0.00018  | 0.00399  |
| TAX1BP3 | 7.003131 | 0.00202  | 0.020026 |
| TBC1D2  | 6.998278 | 0.00261  | 0.024048 |
| TBC1D24 | 6.988583 | 5.00E-05 | 0.001748 |
| TBC1D8  | 6.988583 | 2.00E-04 | 0.00432  |
| TBL2    | 6.906716 | 0.00032  | 0.005938 |
| TBXA2R  | 6.887594 | 4.00E-05 | 0.001548 |
| TBXAS1  | 6.830542 | 0        | 0.00029  |
| TCF7L2  | 6.80691  | 0.00357  | 0.029617 |

|          |          |          |          |
|----------|----------|----------|----------|
| TCN1     | 6.788063 | 0        | 0.000146 |
| TCN2     | 6.745849 | 0.0019   | 0.019323 |
| TES      | 6.745849 | 1.00E-05 | 0.00054  |
| TESC     | 6.736504 | 0.00019  | 0.004117 |
| TFIP11   | 6.736504 | 0.00015  | 0.00351  |
| TFPI     | 6.72251  | 0.00212  | 0.020755 |
| TGFB11I  | 6.703897 | 1.00E-05 | 0.000533 |
| TGM2     | 6.597868 | 0.00014  | 0.003304 |
| THEM2    | 6.575041 | 0        | 0.000315 |
| THOC5    | 6.561383 | 0.00177  | 0.018518 |
| TICAM2   | 6.556837 | 0        | 4.00E-05 |
| TIMP1    | 6.538683 | 2.00E-05 | 0.000769 |
| TIMP2    | 6.520579 | 0.00588  | 0.040835 |
| TJP2     | 6.502525 | 0        | 9.60E-05 |
| TLE3     | 6.502525 | 2.00E-05 | 0.000763 |
| TLN1     | 6.475538 | 0.001    | 0.012808 |
| TLR2     | 6.448663 | 0.00173  | 0.018182 |
| TLR7     | 6.448663 | 6.00E-05 | 0.001888 |
| TLR8     | 6.448663 | 2.00E-05 | 0.000867 |
| TLR9     | 6.413003 | 0.00609  | 0.041923 |
| TM9SF1   | 6.408559 | 0.00027  | 0.005363 |
| TM9SF4   | 6.399681 | 0.00024  | 0.004888 |
| TMCC2    | 6.395247 | 4.00E-05 | 0.001455 |
| TMCO4    | 6.386387 | 0.00011  | 0.002759 |
| TMEM104  | 6.346671 | 0.00427  | 0.033211 |
| TMEM11   | 6.2941   | 0        | 0.000239 |
| TMEM111  | 6.276673 | 1.00E-05 | 0.00035  |
| TMEM127  | 6.272324 | 0.00043  | 0.007191 |
| TMEM140  | 6.220368 | 0.00063  | 0.00942  |
| TMEM158  | 6.164569 | 0.00158  | 0.017143 |
| TMEM177  | 6.164569 | 0.00182  | 0.018748 |
| TMEM185A | 6.151763 | 0.00394  | 0.031635 |
| TMEM189  | 6.13048  | 0.00112  | 0.013844 |
| TMEM214  | 6.117745 | 0.00705  | 0.046333 |
| TMEM217  | 6.062866 | 0.00051  | 0.008231 |
| TMEM219  | 6.050272 | 0.00258  | 0.023803 |
| TMEM229B | 6.00848  | 0.00041  | 0.007027 |
| TMEM40   | 6.00848  | 0.0011   | 0.013676 |
| TMEM49   | 6.00848  | 0.00614  | 0.042131 |
| TMEM60   | 5.991844 | 0        | 0.00018  |
| TMSB4X   | 5.991844 | 0.00441  | 0.033915 |

|           |          |          |          |
|-----------|----------|----------|----------|
| TMTC1     | 5.966976 | 0.00502  | 0.036802 |
| TNFAIP6   | 5.938094 | 0.00133  | 0.015434 |
| TNFAIP8L2 | 5.93398  | 0.00408  | 0.032248 |
| TNFRSF1B  | 5.921653 | 5.00E-05 | 0.001561 |
| TNFRSF8   | 5.91345  | 0.0032   | 0.027524 |
| TNFSF10   | 5.892991 | 0.00486  | 0.035936 |
| TNFSF13   | 5.888907 | 1.00E-04 | 0.002672 |
| TNFSF13B  | 5.876675 | 0.00033  | 0.006088 |
| TNIP1     | 5.868533 | 0.0057   | 0.040075 |
| TNNC2     | 5.856343 | 2.00E-05 | 0.000878 |
| TNNT1     | 5.856343 | 0.00014  | 0.003273 |
| TNS3      | 5.852285 | 0.00252  | 0.023408 |
| TOX2      | 5.84823  | 0.00104  | 0.013147 |
| TP53      | 5.836081 | 0.00069  | 0.010092 |
| TP53I3    | 5.832038 | 0.00273  | 0.024742 |
| TP53RK    | 5.81186  | 0.00096  | 0.012504 |
| TPI1      | 5.81186  | 0.00038  | 0.006719 |
| TPM1      | 5.775717 | 2.00E-04 | 0.004312 |
| TPM4      | 5.763719 | 0.00162  | 0.017437 |
| TPP1      | 5.763719 | 0.00053  | 0.008426 |
| TRAF7     | 5.759725 | 0.00075  | 0.010591 |
| TRAFD1    | 5.755734 | 1.00E-05 | 0.000405 |
| TRAPPC9   | 5.735821 | 0.0071   | 0.046521 |
| TREML1    | 5.735821 | 0.00035  | 0.006286 |
| TREML2    | 5.708058 | 0.00053  | 0.008429 |
| TREML3    | 5.708058 | 0.00561  | 0.039706 |
| TRIB3     | 5.696201 | 2.00E-05 | 0.000851 |
| TRIM14    | 5.68831  | 0.00031  | 0.005854 |
| TRIM21    | 5.680429 | 0.00172  | 0.018173 |
| TRIM47    | 5.676493 | 0.00132  | 0.015358 |
| TRIM58    | 5.660777 | 5.00E-04 | 0.008085 |
| TRIOBP    | 5.652935 | 5.00E-05 | 0.001656 |
| TRIP6     | 5.645103 | 0.0011   | 0.013697 |
| TSC22D1   | 5.621675 | 0.00336  | 0.02845  |
| TSC22D4   | 5.609997 | 0        | 2.00E-06 |
| TSEN34    | 5.602225 | 0.00029  | 0.005522 |
| TSG101    | 5.594464 | 0.00294  | 0.025978 |
| TSPAN33   | 5.575109 | 2.00E-05 | 0.000733 |
| TSPAN9    | 5.563528 | 0.00027  | 0.005304 |
| TST       | 5.559673 | 0.00061  | 0.009239 |
| TTC7A     | 5.559673 | 0.00731  | 0.047414 |



|          |          |          |          |
|----------|----------|----------|----------|
| TTYH3    | 5.559673 | 0.00077  | 0.010682 |
| TUBA3D   | 5.559673 | 1.00E-05 | 0.00043  |
| TUBB1    | 5.532763 | 0.00042  | 0.007083 |
| TUBB4    | 5.5098   | 0.00099  | 0.012747 |
| TUBG1    | 5.505982 | 4.00E-05 | 0.001397 |
| UBA1     | 5.490738 | 0.00025  | 0.005069 |
| UBE2C    | 5.460375 | 0.00193  | 0.019474 |
| UBE2D4   | 5.456591 | 0        | 0.000147 |
| UBE2L3   | 5.45281  | 0.00263  | 0.024108 |
| UBE2L6   | 5.433945 | 0.00163  | 0.01751  |
| UBL4A    | 5.433945 | 0.00632  | 0.042952 |
| UBTD1    | 5.4189   | 0.00055  | 0.008559 |
| UBXN6    | 5.359134 | 0.00073  | 0.010325 |
| UCP2     | 5.35171  | 0.00478  | 0.035643 |
| UNC93B1  | 5.333195 | 3.00E-05 | 0.001186 |
| UPK3A    | 5.303703 | 4.00E-05 | 0.001323 |
| UQCC     | 5.289018 | 8.00E-05 | 0.002361 |
| UQCRC1   | 5.281691 | 3.00E-05 | 0.001293 |
| USP21    | 5.274374 | 0.00474  | 0.035433 |
| USP5     | 5.27072  | 0.00016  | 0.003592 |
| VAC14    | 5.267068 | 2.00E-05 | 0.000778 |
| VASH1    | 5.263418 | 2.00E-05 | 0.000771 |
| VAT1     | 5.256127 | 0.00242  | 0.022706 |
| VCL      | 5.256127 | 0        | 6.30E-05 |
| VEGFB    | 5.252485 | 2.00E-05 | 0.000952 |
| VISA     | 5.223439 | 0.0018   | 0.018637 |
| VKORC1L1 | 5.208977 | 0.00079  | 0.01097  |
| VNN2     | 5.205367 | 0.00017  | 0.003795 |
| VPS18    | 5.201761 | 0.00673  | 0.044799 |
| VPS37C   | 5.194554 | 0.00279  | 0.02506  |
| VSIG4    | 5.190955 | 0        | 0.000194 |
| VSTM1    | 5.183764 | 0.00039  | 0.006788 |
| VTA1     | 5.183764 | 0.00761  | 0.048583 |
| VWA5A    | 5.180172 | 0.00126  | 0.014887 |
| VWF      | 5.180172 | 0.00738  | 0.047685 |
| WARS     | 5.151527 | 0.00205  | 0.020289 |
| WAS      | 5.151527 | 6.00E-05 | 0.001824 |
| WASF3    | 5.151527 | 2.00E-05 | 0.000954 |
| WBP2     | 5.151527 | 0.00547  | 0.039046 |
| WBSCR16  | 5.14439  | 0.00015  | 0.003471 |
| WDR1     | 5.140825 | 0.0038   | 0.030901 |

|         |          |          |          |
|---------|----------|----------|----------|
| WDR40A  | 5.130146 | 8.00E-05 | 0.002333 |
| WIBG    | 5.115942 | 0.00133  | 0.015418 |
| WIPI1   | 5.112397 | 0.00102  | 0.013008 |
| WIPI2   | 5.105315 | 0.00336  | 0.028427 |
| WNT5B   | 5.101778 | 4.00E-05 | 0.00155  |
| XK      | 5.101778 | 0.00108  | 0.013519 |
| XKR8    | 5.09471  | 1.00E-05 | 0.000369 |
| XPNPEP1 | 5.087652 | 7.00E-05 | 0.002126 |
| XRCC6   | 5.080604 | 0.00376  | 0.030696 |
| YIPF1   | 5.080604 | 0.00013  | 0.003119 |
| YIPF6   | 5.049008 | 0.00034  | 0.006211 |
| YWHAE   | 5.03852  | 0.00477  | 0.035602 |
| YWHAH   | 5.035029 | 0.00054  | 0.008448 |
| ZBTB3   | 5.021088 | 5.00E-04 | 0.008107 |
| ZBTB9   | 5.017609 | 3.00E-05 | 0.001039 |
| ZC3H10  | 5.007186 | 6.00E-05 | 0.001945 |
| ZCCHC17 | 4.996785 | 6.00E-05 | 0.001841 |
| ZDHHC24 | 4.986405 | 0.00469  | 0.035225 |
| ZFHX3   | 4.979497 | 0.00189  | 0.019259 |
| ZFYVE21 | 4.969153 | 0        | 8.90E-05 |
| ZKSCAN5 | 4.962269 | 0.0012   | 0.014443 |
| ZNF16   | 4.962269 | 0.00208  | 0.020487 |
| ZNF185  | 4.955395 | 0.00181  | 0.018704 |
| ZNF189  | 4.945101 | 7.00E-05 | 0.002005 |
| ZNF200  | 4.931409 | 0.00047  | 0.007741 |
| ZNF213  | 4.927992 | 0.00344  | 0.028902 |
| ZNF271  | 4.914348 | 0.00167  | 0.01787  |
| ZNF282  | 4.910943 | 0.00148  | 0.016502 |
| ZNF322A | 4.90754  | 0.00435  | 0.033571 |
| ZNF341  | 4.90754  | 0.00212  | 0.020755 |
| ZNF35   | 4.904139 | 0.00156  | 0.017036 |
| ZNF385A | 4.897346 | 0.00381  | 0.03094  |
| ZNF408  | 4.893952 | 0.00052  | 0.008286 |
| ZNF503  | 4.883786 | 0.00604  | 0.041584 |
| ZNF524  | 4.880402 | 3.00E-05 | 0.001269 |
| ZNF564  | 4.87702  | 0.00355  | 0.029492 |
| ZNF574  | 4.87702  | 0.00736  | 0.047607 |
| ZNF580  | 4.873641 | 0.00485  | 0.03587  |
| ZNF581  | 4.85678  | 0.00011  | 0.002788 |
| ZNF646  | 4.85678  | 1.00E-05 | 0.000438 |
| ZNF696  | 4.853414 | 0.00038  | 0.006645 |

|        |          |         |          |
|--------|----------|---------|----------|
| ZNF746 | 4.846691 | 0.00015 | 0.003592 |
| ZNF775 | 4.839976 | 0.00287 | 0.025606 |
| ZNF79  | 4.839976 | 0.00032 | 0.005999 |
| ZNF828 | 4.836623 | 0.00734 | 0.047566 |
| ZSWIM3 | 4.833271 | 0.00064 | 0.009475 |
| ZYX    | 4.829922 | 0.00034 | 0.006261 |

| <b>Genes down regulated in <i>P.falciparum</i> (F)</b> | <b>FC&lt;-2 (in -ve)</b> | <b>P value</b> | <b>FDR corrected P value</b> |
|--------------------------------------------------------|--------------------------|----------------|------------------------------|
| ABCC5                                                  | 2.286276671              | 0.00146        | 0.023432                     |
| ABL1                                                   | 2.148008943              | 0.00068        | 0.042486                     |
| ABLIM1                                                 | 2.413287839              | 0.00021        | 0.010409                     |
| ACACB                                                  | 2.993845974              | 0.00666        | 0.003592                     |
| ACAD11                                                 | 2.308570835              | 0.00255        | 0.002865                     |
| ACCS                                                   | 2.037782393              | 1.00E-05       | 0.000155                     |
| ACPL2                                                  | 2.433444717              | 0.00015        | 0.000369                     |
| ACTR5                                                  | 2.143546925              | 0.00035        | 0.036212                     |
| ACYP1                                                  | 2.566851795              | 0.0019         | 0.009075                     |
| ADARB1                                                 | 2.617156143              | 0.00602        | 0.004301                     |
| ADCY7                                                  | 3.535710124              | 2.00E-05       | 0.002174                     |
| ADD3                                                   | 2.074839873              | 0.00115        | 0.003185                     |
| ADHFE1                                                 | 2.595477534              | 8.00E-05       | 0.008429                     |
| AFG3L1                                                 | 3.328794939              | 0.00016        | 0.022576                     |
| AGAP6                                                  | 3.12314597               | 0.00237        | 0.048077                     |
| AGAP8                                                  | 2.653690281              | 0.00274        | 0.005739                     |
| AGER                                                   | 3.398739997              | 3.00E-05       | 0.028163                     |
| AHR                                                    | 3.321880096              | 0.00011        | 9.60E-05                     |
| AHSA2                                                  | 2.599078125              | 0.00024        | 0.049241                     |
| AIRE                                                   | 2.298989696              | 0.00264        | 0.037791                     |
| AK1                                                    | 3.149231906              | 2.00E-04       | 0.00014                      |
| AKIRIN1                                                | 3.607501514              | 0.00687        | 0.001229                     |
| AKR1D1                                                 | 2.115501927              | 0              | 0.000362                     |
| AKTIP                                                  | 2.762548896              | 0.00089        | 0.006322                     |
| ALKBH6                                                 | 3.580100284              | 0.00132        | 0.004309                     |
| ALPP                                                   | 2.760634707              | 0              | 0.049347                     |
| AMT                                                    | 3.249009585              | 0.00087        | 0.003705                     |
| AMY2A                                                  | 3.090842199              | 0.00125        | 0.027947                     |
| AMY2B                                                  | 2.737767626              | 5.00E-05       | 0.004284                     |
| ANAPC1                                                 | 2.339175328              | 0.00186        | 0.034204                     |
| ANAPC4                                                 | 2.370185542              | 0.00344        | 0.014887                     |
| ANKDD1A                                                | 2.167451934              | 0.00489        | 0.014876                     |
| ANKLE2                                                 | 2.340797283              | 2.00E-05       | 0.003494                     |

|          |             |          |          |
|----------|-------------|----------|----------|
| ANKMY1   | 2.381713699 | 1.00E-05 | 0.02227  |
| ANKRA2   | 2.793357065 | 1.00E-05 | 0.003021 |
| ANKRD10  | 2.355445579 | 0.00057  | 0.005304 |
| ANKRD11  | 2.45206972  | 6.00E-05 | 7.90E-05 |
| ANKRD12  | 3.446184639 | 0.00059  | 0.017133 |
| ANKRD13C | 2.164449289 | 0.00016  | 0.002499 |
| ANKRD13D | 2.015307521 | 0.00116  | 0.005069 |
| ANKRD30B | 2.250116969 | 8.00E-05 | 0.001464 |
| ANKRD36  | 2.259494429 | 0.00025  | 0.015268 |
| ANKRD36B | 2.505328877 | 0.00206  | 0.01606  |
| ANKRD49  | 2.303775285 | 0.00469  | 0.002249 |
| ANKS3    | 2.214529169 | 0.00066  | 0.011844 |
| ANKZF1   | 2.396618043 | 0.00456  | 0.00249  |
| ANO9     | 2.057653416 | 0.00578  | 0.011102 |
| AP4B1    | 3.301221634 | 0.00029  | 0.027695 |
| APBB3    | 2.425025638 | 0.0019   | 0.00817  |
| ARGLU1   | 3.470154749 | 3.00E-05 | 0.018589 |
| ARHGAP30 | 2.745368863 | 0.00152  | 0.003533 |
| ARHGAP4  | 2.828427125 | 0.00481  | 0.029913 |
| ARID4B   | 2.901904416 | 0.00071  | 0.003211 |
| ARIH2    | 2.538541772 | 0.00273  | 0.001886 |
| ARL16    | 2.72829567  | 0.00038  | 0.011698 |
| ARL4A    | 2.489748471 | 0.00532  | 0.047813 |
| ARL4C    | 3.267075964 | 0        | 0.004034 |
| ARMCX4   | 2.494931144 | 0.00029  | 0.043354 |
| ARRDC3   | 2.651851521 | 8.00E-05 | 0.000347 |
| ARRDC5   | 2.724516069 | 0.00269  | 3.70E-05 |
| ASB1     | 2.248557848 | 0.00136  | 0.01922  |
| ASNS     | 3.002158195 | 0.00155  | 0.035225 |
| ASPSCR1  | 2.411615655 | 0.00251  | 0.033482 |
| ATF3     | 3.099423724 | 0.00525  | 0.012173 |
| ATF4     | 3.528365461 | 0.00269  | 0.039631 |
| ATG12    | 2.170458744 | 4.00E-04 | 0.013407 |
| ATG16L2  | 3.462946262 | 0        | 0.029221 |
| ATG4B    | 2.057653416 | 0.00198  | 0.022296 |
| ATHL1    | 3.338037125 | 1.00E-05 | 0.010293 |
| ATM      | 2.300583787 | 0.00076  | 0.012941 |
| ATP6V0E2 | 2.806943452 | 0.00084  | 0.045094 |
| ATP8B2   | 2.448672785 | 0.00202  | 0.035717 |
| ATPBD1B  | 2.388326374 | 0.00472  | 0.013649 |
| AXIN2    | 2.484576564 | 8.00E-05 | 0.001266 |

|          |             |          |          |
|----------|-------------|----------|----------|
| AXUD1    | 3.048289661 | 0.00158  | 0.000435 |
| BANP     | 2.066228775 | 0.00294  | 0.001457 |
| BBS2     | 2.353813474 | 4.00E-05 | 0.0108   |
| BCKDHB   | 2.730187436 | 0        | 0.003053 |
| BCL11A   | 2.781763943 | 0.00075  | 0.010629 |
| BCL11B   | 2.093620564 | 0.0043   | 0.001991 |
| BCL2     | 3.439025945 | 0.00111  | 0.023439 |
| BCLAF1   | 2.344044567 | 0.00169  | 0.026603 |
| BCYRN1   | 3.097276111 | 0.00453  | 0.018637 |
| BEX2     | 3.58258268  | 0.00354  | 0.018637 |
| BHLHB2   | 2.391639594 | 1.00E-05 | 0.004243 |
| BIRC2    | 3.43664302  | 4.00E-05 | 0.013093 |
| BIRC3    | 2.535025044 | 0.00474  | 0.024932 |
| BLZF1    | 2.579336501 | 0        | 0.033033 |
| BMS1P5   | 2.820595921 | 0.00136  | 0.017019 |
| BRUNOL6  | 2.568631618 | 0.00085  | 0.033441 |
| BTAF1    | 2.15995312  | 3.00E-05 | 0.000519 |
| BTN2A1   | 2.826467288 | 9.00E-05 | 0.00317  |
| BUB3     | 2.217601287 | 9.00E-05 | 0.030894 |
| CA5B     | 2.421666168 | 0.00295  | 7.00E-06 |
| CACNA1I  | 2.125791349 | 7.00E-05 | 0.005648 |
| CAMK2N1  | 2.909961367 | 4.00E-05 | 0.043218 |
| CAMK4    | 3.285242803 | 0.00458  | 0.010662 |
| CAPN12   | 2.522754818 | 0.0024   | 0.025402 |
| CAPN7    | 2.486299338 | 2.00E-05 | 0.005592 |
| CAPRIN2  | 2.498392251 | 0.00278  | 0.010571 |
| CAPS     | 2.421666168 | 0.00361  | 0.006834 |
| CARD11   | 2.143546925 | 8.00E-05 | 0.007588 |
| CARD8    | 2.368543224 | 1.00E-05 | 0.024983 |
| CASC4    | 2.895876345 | 0.00057  | 0.042081 |
| CATSPER2 | 2.946495372 | 0.00563  | 0.024065 |
| CBLL1    | 2.316585612 | 0.00141  | 0.009533 |
| CCBE1    | 2.119905567 | 5.00E-05 | 0.006168 |
| CCDC104  | 2.228387302 | 0.00173  | 0.017975 |
| CCDC125  | 2.348923942 | 6.00E-05 | 0.013785 |
| CCDC130  | 2.276788058 | 0.00244  | 0.034656 |
| CCDC14   | 3.396384986 | 0.00086  | 0.002401 |
| CCDC45   | 2.100889088 | 0.00146  | 0.001203 |
| CCDC58   | 2.164449289 | 2.00E-05 | 0.000978 |
| CCDC65   | 2.300583787 | 6.00E-04 | 0.028931 |
| CCDC66   | 2.226843236 | 0.00106  | 0.001183 |

|            |             |          |          |
|------------|-------------|----------|----------|
| CCDC76     | 2.109644634 | 0.00059  | 0.040925 |
| CCDC84     | 2.679567205 | 0.00116  | 0.012941 |
| CCDC93     | 2.950582914 | 0.00511  | 0.037182 |
| CCL3       | 2.240778428 | 0.00026  | 0.040187 |
| CCL3L1     | 3.016760153 | 0.00284  | 0.023855 |
| CCL3L3     | 2.486299338 | 0        | 0.028931 |
| CCM2       | 2.799171731 | 0.00041  | 0.034624 |
| CCNL1      | 2.365262    | 0.00032  | 0.049764 |
| CCNT2      | 2.399942765 | 0.00092  | 0.014135 |
| CCR6       | 3.489450823 | 0.00748  | 0.006387 |
| CCR7       | 2.30697121  | 1.00E-05 | 0.046319 |
| CCT6A      | 3.08656035  | 0.00193  | 0.015533 |
| CD1C       | 2.140577397 | 0.00013  | 0.046337 |
| CD3G       | 2.507066041 | 0.00536  | 0.041702 |
| CD6        | 3.21986455  | 0.003    | 0.03587  |
| CD69       | 3.190980959 | 0.00225  | 0.005574 |
| CD83       | 2.156960863 | 0        | 0.011196 |
| CD96       | 2.889860796 | 0.00706  | 0.004095 |
| CDAN1      | 2.294214048 | 6.00E-05 | 0.004625 |
| CDC14A     | 2.063366359 | 0.00277  | 0.037678 |
| CDC16      | 2.559744828 | 0.00031  | 0.007568 |
| CDC2L2     | 3.269341314 | 0.00285  | 0.001313 |
| CDH23      | 3.630076621 | 0.00126  | 0.024768 |
| CDK10      | 2.566851795 | 0.00111  | 0.009324 |
| CDK5R1     | 2.609909895 | 0.00151  | 0.046938 |
| CDK5RAP3   | 3.273876726 | 2.00E-04 | 0.001824 |
| CDKN1B     | 2.179504224 | 0.00094  | 0.024627 |
| CDKN2AIP   | 3.197623321 | 0.0018   | 0.019977 |
| CDKN2AIPNL | 2.360348687 | 0.00497  | 0.001207 |
| CDR2       | 2.130216407 | 0.00112  | 0.00426  |
| CENPJ      | 3.184352395 | 0        | 0.027314 |
| CENPK      | 2.316585612 | 0.00025  | 0.011965 |
| CEP110     | 2.032140286 | 0        | 0.048429 |
| CEP135     | 2.254800824 | 0.0019   | 0.000901 |
| CEP170     | 2.8108374   | 2.00E-05 | 0.025978 |
| CEP192     | 2.642676811 | 0.00098  | 0.034775 |
| CHCHD7     | 2.64634288  | 0.00083  | 0.012961 |
| CHKB       | 3.308093474 | 8.00E-05 | 0.028814 |
| CHRNA5     | 2.388326374 | 0.00669  | 0.015344 |
| CIRBP      | 2.918040688 | 0.00274  | 0.024474 |
| CLDN15     | 2.286276671 | 0.00776  | 0.019022 |

|            |             |          |          |
|------------|-------------|----------|----------|
| CLDND2     | 2.545589871 | 0.00062  | 0.029408 |
| CLEC7A     | 2.228387302 | 4.00E-04 | 0.002427 |
| CLK1       | 2.208397694 | 0.00042  | 0.019791 |
| CLK2       | 2.846126922 | 7.00E-04 | 0.027921 |
| CLK3       | 3.662934746 | 0.00435  | 0.019313 |
| CNPY4      | 2.726405215 | 0.00041  | 0.005689 |
| CNTNAP1    | 2.278366754 | 9.00E-04 | 0.031003 |
| COCH       | 3.050403307 | 0.00166  | 0.028902 |
| COG3       | 2.173469725 | 3.00E-04 | 0.039075 |
| COLQ       | 2.954676127 | 1.00E-05 | 0.037237 |
| COX19      | 3.40817638  | 8.00E-05 | 0.044573 |
| CPEB2      | 2.043440165 | 0.00399  | 0.032529 |
| CPT1B      | 2.430073584 | 0.00126  | 0.007046 |
| CRCP       | 3.424753138 | 0        | 0.019582 |
| CREB1      | 2.177994031 | 0.00114  | 0.000953 |
| CREBZF     | 2.624422509 | 0.00223  | 0.033686 |
| CRLF3      | 2.768299432 | 0.00094  | 0.034494 |
| CROP       | 2.732080514 | 6.00E-05 | 0.009193 |
| CRY1       | 2.414961183 | 0.00129  | 0.018329 |
| CRYGS      | 2.418311352 | 0.00409  | 0.015558 |
| CRYZL1     | 2.100889088 | 0.00202  | 0.01242  |
| CSAD       | 2.911979098 | 0.00013  | 0.017747 |
| CSDE1      | 3.160165247 | 0.00013  | 0.040201 |
| CSE1L      | 3.34962595  | 2.00E-05 | 0.014968 |
| CSGALNACT2 | 3.071620539 | 0.00136  | 0.046532 |
| CSNK1E     | 2.194663875 | 0.00268  | 0.018415 |
| CSPP1      | 2.233025924 | 0.00054  | 0.001651 |
| CSTF3      | 3.073750363 | 0.00432  | 0.035277 |
| CTGLF3     | 2.251677172 | 0.00157  | 0.047586 |
| CTLA4      | 3.30351066  | 0.00155  | 0.020036 |
| CTNNB1     | 2.891864589 | 0.00086  | 0.043557 |
| CTRL       | 2.500124605 | 0.00166  | 0.028291 |
| CTSK       | 2.952628811 | 0.00022  | 0.037772 |
| CUL4A      | 2.083486858 | 0.00481  | 0.0034   |
| CXCL2      | 2.231478645 | 0.00597  | 0.002453 |
| CXCR4      | 2.670296607 | 9.00E-05 | 0.038256 |
| CXorf40A   | 2.770218936 | 0.00613  | 0.013626 |
| CXorf40B   | 2.991771517 | 0.00132  | 0.001033 |
| CXorf45    | 2.300583787 | 0.00645  | 0.029696 |
| CXorf65    | 2.070529848 | 0.00573  | 0.0061   |
| CYLD       | 2.303775285 | 6.00E-04 | 0.016489 |

|        |             |          |          |
|--------|-------------|----------|----------|
| CYP2R1 | 3.3449856   | 0.00158  | 0.000383 |
| CYP4B1 | 2.326240083 | 3.00E-05 | 0.035724 |
| CYTH2  | 2.508804409 | 6.00E-05 | 0.023347 |
| D2HGDH | 3.276146791 | 0.00087  | 0.019022 |
| DACT1  | 2.07915887  | 0.00235  | 0.039427 |
| DDB1   | 2.225300241 | 0.00711  | 0.034663 |
| DDIT3  | 2.918040688 | 2.00E-05 | 0.024143 |
| DDIT4  | 2.042024251 | 0.00061  | 0.007227 |
| DDX17  | 2.348923942 | 2.00E-05 | 0.040397 |
| DDX27  | 2.29739671  | 2.00E-04 | 0.037815 |
| DDX39  | 2.852051435 | 0.00118  | 0.039631 |
| DDX5   | 2.475980582 | 0.00718  | 0.000898 |
| DDX51  | 2.061936638 | 0        | 0.011534 |
| DDX55  | 2.450370664 | 0.00012  | 0.034697 |
| DEM1   | 2.681425183 | 1.00E-05 | 0.004426 |
| DGKQ   | 3.090842199 | 9.00E-05 | 0.015574 |
| DIDO1  | 2.131693472 | 0.00072  | 0.043076 |
| DIP2A  | 2.114036081 | 0.0019   | 0.019775 |
| DIS3L  | 3.543070076 | 0.00134  | 0.022359 |
| DMC1   | 2.20686748  | 1.00E-05 | 0.005571 |
| DMTF1  | 2.394957409 | 0        | 0.044821 |
| DNAH1  | 2.019502595 | 0.00025  | 0.01478  |
| DNAJB9 | 2.0265138   | 0.00015  | 0.02606  |
| DPP4   | 2.071965527 | 0.00049  | 0.00317  |
| DPP7   | 3.620025852 | 0.00064  | 0.012311 |
| DUSP1  | 2.633533844 | 0.00198  | 0.027916 |
| DUSP19 | 2.413287839 | 0.00291  | 0.024287 |
| DUSP2  | 2.887858391 | 0.00083  | 0.018173 |
| DUT    | 2.679567205 | 3.00E-04 | 0.000405 |
| DUXAP3 | 3.002158195 | 0.00356  | 0.015939 |
| DYNLL2 | 2.846126922 | 2.00E-05 | 0.034599 |
| DYRK1A | 2.130216407 | 0.00051  | 4.00E-06 |
| DYRK2  | 3.386981249 | 0.00074  | 0.015574 |
| E4F1   | 2.127265346 | 0.00102  | 0.028764 |
| EBI2   | 3.494291584 | 0.00046  | 0.01094  |
| ECHDC2 | 3.127478573 | 0        | 0.001132 |
| EDAR   | 2.108182847 | 0.00213  | 0.035456 |
| EDG4   | 2.507066041 | 0.00015  | 0.026879 |
| EGR1   | 2.355445579 | 0.00029  | 0.006889 |
| EGR2   | 2.324628215 | 1.00E-04 | 0.001917 |
| EID2B  | 2.106722072 | 0.00252  | 0.012171 |



|          |             |          |          |
|----------|-------------|----------|----------|
| EIF1     | 2.575763259 | 2.00E-05 | 0.004959 |
| EIF3CL   | 2.445280555 | 0.00485  | 0.00942  |
| EIF4A1   | 2.863937482 | 0.00026  | 0.010184 |
| EIF4A2   | 2.146520573 | 4.00E-05 | 0.015517 |
| EIF5     | 2.416635687 | 0.00164  | 0.019479 |
| ELF2     | 2.344044567 | 0.00457  | 0.032248 |
| ENO3     | 2.185555478 | 0.00032  | 0.00646  |
| ENOSF1   | 2.262628926 | 0.00175  | 0.002879 |
| ENSA     | 2.15248025  | 6.00E-05 | 0.003592 |
| EPC1     | 2.474264957 | 7.00E-05 | 0.029538 |
| EPHA4    | 3.670559529 | 0.00092  | 0.00942  |
| EPHX2    | 3.07801444  | 0.00086  | 0.000349 |
| ERN1     | 2.370185542 | 9.00E-05 | 0.029453 |
| ERP27    | 2.283109414 | 0.00457  | 0.013678 |
| ETS1     | 2.791421528 | 0        | 0.001362 |
| ETV3     | 2.261061134 | 0        | 0.015823 |
| EVL      | 2.611719574 | 0.00109  | 0.011046 |
| EXOSC8   | 3.149231906 | 0.00402  | 0.01914  |
| EXOSC9   | 2.295804828 | 0.00456  | 0.015574 |
| EYA3     | 2.572194967 | 0.0068   | 0.017747 |
| FAM102A  | 2.543826013 | 7.00E-05 | 0.039819 |
| FAM10A4  | 2.331082396 | 0.00046  | 0.02635  |
| FAM111A  | 2.073402202 | 0.00201  | 0.002865 |
| FAM113A  | 2.220677667 | 1.00E-05 | 0.006584 |
| FAM115A  | 2.127265346 | 6.00E-05 | 0.001753 |
| FAM116A  | 2.15248025  | 0.00045  | 0.041329 |
| FAM119A  | 2.441893025 | 0.00011  | 0.002743 |
| FAM134B  | 2.633533844 | 0.00033  | 0.04788  |
| FAM13A   | 2.521006783 | 0        | 0.001012 |
| FAM13AOS | 2.674000991 | 3.00E-05 | 0.000874 |
| FAM153B  | 2.292624371 | 2.00E-05 | 5.50E-05 |
| FAM156A  | 3.164549205 | 0.00359  | 0.028658 |
| FAM156B  | 2.253238457 | 0.005    | 0.017216 |
| FAM175A  | 3.267075964 | 0.00188  | 0.038658 |
| FAM190B  | 3.58258268  | 0.00311  | 0.006373 |
| FAM24B   | 2.848100391 | 0.00036  | 0.021407 |
| FAM39DP  | 2.450370664 | 5.00E-05 | 0.001591 |
| FAM39E   | 2.859969973 | 0.0015   | 0.00098  |
| FAM73A   | 2.335934789 | 3.00E-05 | 0.049344 |
| FAM76B   | 2.197708435 | 0.00776  | 0.001803 |
| FAM84B   | 2.609909895 | 0.00485  | 0.008102 |

|          |             |          |          |
|----------|-------------|----------|----------|
| FARSLB   | 2.173469725 | 0.00063  | 0.000763 |
| FASTK    | 2.179504224 | 0.00012  | 0.015147 |
| FBLN5    | 2.298989696 | 2.00E-05 | 0.005816 |
| FBXO11   | 3.246758324 | 0.00326  | 0.028931 |
| FBXO33   | 2.345669898 | 0.0018   | 0.009927 |
| FBXW4    | 2.199232299 | 0.00787  | 0.020806 |
| FCAR     | 3.24226048  | 0.00656  | 0.011969 |
| FCRL2    | 3.23104311  | 0.00025  | 0.002401 |
| FCRL3    | 2.00416321  | 8.00E-05 | 0.002844 |
| FKBP14   | 2.291035796 | 0.00031  | 0.019824 |
| FLJ10213 | 2.488023307 | 0.00262  | 0.044019 |
| FLJ21865 | 2.111107435 | 0.00296  | 0.000975 |
| FLJ25006 | 2.406606052 | 0.00555  | 0.001066 |
| FLJ31306 | 2.803054898 | 0.00022  | 0.000954 |
| FLJ32255 | 2.345669898 | 0.00109  | 9.00E-05 |
| FLJ35785 | 2.019502595 | 0        | 0.034009 |
| FLJ43663 | 3.157975547 | 9.00E-04 | 8.00E-06 |
| FLJ44342 | 2.253238457 | 2.00E-04 | 0.002321 |
| FN3KRP   | 3.095129987 | 0.00079  | 0.008843 |
| FNDC3A   | 2.380063393 | 0.00719  | 0.019474 |
| FOS      | 2.724516069 | 0        | 0.04266  |
| FOSB     | 2.071965527 | 0.0022   | 4.80E-05 |
| FOXP1    | 2.125791349 | 0.00572  | 0.004929 |
| FRAG1    | 2.524504064 | 3.00E-05 | 0.003667 |
| FVT1     | 2.543826013 | 0.00024  | 0.049768 |
| FYN      | 2.521006783 | 0.00029  | 0.032014 |
| GABBR1   | 2.613530508 | 0.00016  | 0.01979  |
| GAL3ST4  | 2.020902893 | 1.00E-05 | 0.022224 |
| GALIG    | 2.345669898 | 1.00E-04 | 0.019301 |
| GDPD3    | 2.30697121  | 0.00443  | 2.20E-05 |
| GFM2     | 2.498392251 | 0.00016  | 0.026943 |
| GGA1     | 3.429504147 | 8.00E-05 | 0.042195 |
| GGTL3    | 2.261061134 | 6.00E-05 | 0.037868 |
| GIT2     | 2.747272467 | 1.00E-05 | 0.036698 |
| GLMN     | 3.149231906 | 0.00161  | 0.000533 |
| GOLGA8A  | 2.989698497 | 0.0035   | 0.02341  |
| GOLGA8B  | 2.074839873 | 0.00293  | 0.027432 |
| GPBP1    | 2.326240083 | 0.00253  | 0.011557 |
| GPR89B   | 2.547354951 | 0.00728  | 4.40E-05 |
| GRAP     | 2.294214048 | 0.00635  | 0.010325 |
| GRIPAP1  | 2.581124981 | 0.00179  | 0.000997 |

|           |             |          |          |
|-----------|-------------|----------|----------|
| GSDMB     | 2.217601287 | 0.00155  | 0.011234 |
| GTF2H3    | 2.001386775 | 9.00E-05 | 0.006945 |
| GTF2IRD2P | 2.597277205 | 1.00E-05 | 0.000123 |
| GTPBP3    | 3.014669819 | 0.00259  | 0.01976  |
| GUSBL1    | 3.199840513 | 2.00E-05 | 0.002879 |
| HBEGF     | 2.184041091 | 0.00108  | 0.000175 |
| HEATR5B   | 3.25577274  | 0.00064  | 0.011158 |
| HECA      | 3.058872556 | 0.00011  | 1.00E-06 |
| HERC4     | 2.46741434  | 0.00127  | 0.019932 |
| HEXDC     | 2.526254524 | 0.00018  | 0.023408 |
| HIATL1    | 2.926142441 | 0.00034  | 0.006399 |
| HIATL2    | 2.071965527 | 0.00035  | 0.032021 |
| HIF3A     | 2.435132037 | 0.00296  | 0.002348 |
| HIP1R     | 2.590085998 | 2.00E-05 | 0.005763 |
| HMGB1L1   | 2.70007597  | 0.00024  | 0.01673  |
| HMGNI     | 2.828427125 | 0.00437  | 0.035904 |
| HMGNI2    | 2.72829567  | 0.00674  | 0.029566 |
| HNRNPA2B1 | 3.149231906 | 0.00597  | 0.00922  |
| HNRNPH1   | 2.064797071 | 0.00076  | 0.033592 |
| HNRNPU    | 2.751083636 | 0.00431  | 0.005629 |
| HNRPA1L-2 | 2.536782799 | 0.00143  | 0.034466 |
| HNRPA1P4  | 2.253238457 | 9.00E-05 | 0.035801 |
| HNRPDL    | 2.187070915 | 1.00E-05 | 0.001977 |
| HSD17B11  | 3.370587318 | 0.00548  | 0.029019 |
| HSD17B7P2 | 2.493202389 | 0.00011  | 0.001057 |
| ID1       | 3.403454918 | 0.00278  | 0.002032 |
| IER2      | 2.383365149 | 0.00263  | 0.002231 |
| IER3IP1   | 3.041957506 | 2.00E-05 | 0.008524 |
| IL11RA    | 3.195407666 | 0.00344  | 0.002221 |
| IL18R1    | 3.097276111 | 0.00016  | 0.046262 |
| IL7R      | 2.086377187 | 0.00513  | 0.004583 |
| IL8       | 2.758721844 | 0.002    | 0.031808 |
| IMPA1     | 2.176484883 | 0.00071  | 0.021293 |
| INTS1     | 2.600880293 | 0.00324  | 0.002111 |
| INTS4     | 2.222217457 | 1.00E-05 | 0.001077 |
| INTS6     | 2.196185628 | 0.00011  | 0.03587  |
| INTS8     | 2.363623094 | 4.00E-04 | 0.00122  |
| ISY1      | 2.112571251 | 0.00219  | 0.034054 |
| ITGAE     | 3.595020506 | 0        | 0.002311 |
| ITPR3     | 2.344044567 | 0.00253  | 0.041275 |
| JUN       | 3.494291584 | 0.00107  | 0.015156 |

|           |             |          |          |
|-----------|-------------|----------|----------|
| KAT2A     | 2.453769955 | 0.00524  | 0.014981 |
| KCTD5     | 2.124318373 | 0.00158  | 0.02611  |
| KIAA0146  | 2.225300241 | 0        | 0.009119 |
| KIAA0495  | 2.536782799 | 0.00447  | 0.016683 |
| KIAA0748  | 2.408274762 | 0.00064  | 0.005899 |
| KIAA1109  | 2.348923942 | 0.00444  | 0.021569 |
| KIAA1147  | 2.137611982 | 1.00E-04 | 0.046835 |
| KIAA1370  | 2.804998501 | 3.00E-05 | 0.001548 |
| KIAA1468  | 2.162949527 | 0.00122  | 0.002287 |
| KIAA1641  | 2.153972752 | 0.00073  | 0.002011 |
| KIAA1731  | 3.375263185 | 0.00011  | 0.002197 |
| KIAA1875  | 2.72829567  | 0.00408  | 0.014705 |
| KIAA2010  | 2.633533844 | 0.00019  | 0.005169 |
| KIF27     | 2.310171569 | 0.00043  | 0.036116 |
| KIFC2     | 2.793357065 | 0.00034  | 0.018637 |
| KLF4      | 3.138336392 | 0        | 0.000742 |
| KLF6      | 2.897884309 | 0.00072  | 0.04541  |
| KLHDC2    | 2.044857061 | 0.00101  | 0.026943 |
| KLHL28    | 3.246758324 | 3.00E-04 | 0.028902 |
| KLHL29    | 2.134650676 | 1.00E-05 | 0.002504 |
| KLRF1     | 2.034959384 | 9.00E-04 | 0.003494 |
| KPNA5     | 2.33269874  | 1.00E-05 | 0.002612 |
| KRT72     | 2.431758566 | 0.00178  | 0.023421 |
| KTELC1    | 2.111107435 | 0.00452  | 0.024511 |
| LARP7     | 2.557971163 | 9.00E-05 | 0.005648 |
| LAT1-3TM  | 2.542063379 | 0.00363  | 0.008297 |
| LBR       | 2.448672785 | 0        | 0.037194 |
| LCK       | 2.795293944 | 0.00681  | 0.004469 |
| LCOR      | 2.543826013 | 0.00638  | 0.022844 |
| LEMD2     | 3.550445349 | 0.00105  | 0.037267 |
| LETMD1    | 2.140577397 | 0.00198  | 0.031331 |
| LIAS      | 2.538541772 | 0.0047   | 0.034505 |
| LINS1     | 2.130216407 | 0        | 0.045127 |
| LPIN1     | 2.435132037 | 0.00145  | 0.004941 |
| LRCH3     | 2.66474965  | 0.00027  | 0.022473 |
| LRCH4     | 2.591881931 | 1.00E-04 | 0.006861 |
| LRP5L     | 2.496661098 | 0.00026  | 0.024163 |
| LUC7L     | 2.366902044 | 0.00341  | 0.008814 |
| LYSMD4    | 2.808889751 | 0.00036  | 0.000861 |
| MAFF      | 2.958775018 | 1.00E-05 | 0.047586 |
| MAP3K7IP3 | 2.034959384 | 0.00033  | 0.021499 |

|            |             |          |          |
|------------|-------------|----------|----------|
| MAP4K5     | 2.047693801 | 0.0018   | 0.005752 |
| MAPK8IP3   | 2.046274939 | 0.00739  | 0.007167 |
| MAPKAPK5   | 2.760634707 | 5.00E-05 | 0.005947 |
| MATR3      | 2.830388321 | 0.00069  | 0.019707 |
| MBNL1      | 2.283109414 | 5.00E-05 | 0.009104 |
| MBTD1      | 2.185555478 | 0        | 0.001216 |
| MCF2L2     | 2.29739671  | 0        | 0.00293  |
| MCHR2      | 3.642679334 | 0.00737  | 2.00E-06 |
| MDN1       | 2.049113646 | 0.00113  | 0.040412 |
| MED27      | 2.458877735 | 0.00193  | 0.021189 |
| MEGF6      | 2.321407829 | 0        | 0.000681 |
| METT11D1   | 2.64450921  | 5.00E-05 | 0.001944 |
| MGC16384   | 2.446976082 | 0.00064  | 0.002036 |
| MGC5457    | 2.488023307 | 0.0018   | 0.031144 |
| MIAT       | 2.66474965  | 0.0013   | 0.037897 |
| MID2       | 2.958775018 | 0.00356  | 0.033627 |
| MLKL       | 3.157975547 | 0.00021  | 0.036544 |
| MLL5       | 2.887858391 | 0.00323  | 2.70E-05 |
| MLLT10     | 2.600880293 | 0.00526  | 0.003546 |
| MMS19      | 2.168954818 | 3.00E-05 | 0.005074 |
| MORF4L1    | 2.591881931 | 1.00E-04 | 0.014585 |
| MPHOSPH8   | 2.273633946 | 1.00E-05 | 0.020816 |
| MRI1       | 2.170458744 | 0.00306  | 0.004569 |
| MRPL21     | 2.46058269  | 8.00E-04 | 0.003599 |
| MRPL43     | 3.144869169 | 0        | 0.018637 |
| MRPS21     | 2.352182501 | 0.00626  | 0.019283 |
| MRPS25     | 3.415270858 | 3.00E-04 | 0.020311 |
| MRRF       | 2.345669898 | 0.00342  | 0.020766 |
| MS4A1      | 2.063366359 | 1.00E-05 | 0.025446 |
| MST1       | 2.057653416 | 0        | 0.001557 |
| MTMR1      | 2.692600139 | 0.00015  | 0.014828 |
| MTRF1      | 2.164449289 | 0.00082  | 0.035151 |
| MYO3B      | 2.105262309 | 0.00227  | 0.00264  |
| N4BP2      | 3.031433133 | 0.00059  | 7.20E-05 |
| N4BP2L2    | 2.907945035 | 0.00521  | 0.040314 |
| NAPIL3     | 2.455471368 | 0.00103  | 0.004237 |
| NARG1L     | 2.791421528 | 0.00576  | 0.010975 |
| NBPF14     | 2.572194967 | 0.0014   | 0.009094 |
| NBPF8      | 3.069492192 | 0.0031   | 0.004184 |
| NCRNA00219 | 3.273876726 | 0.0018   | 0.012529 |
| NDRG2      | 2.139094176 | 0.00319  | 0.043731 |

|          |             |          |          |
|----------|-------------|----------|----------|
| NELL2    | 3.361255009 | 1.00E-05 | 0.012276 |
| NFATC2IP | 3.208724665 | 7.00E-05 | 0.011927 |
| NFKBIZ   | 2.840214717 | 0.00041  | 0.002453 |
| NFX1     | 2.199232299 | 0.00252  | 0.005522 |
| NGDN     | 3.1777376   | 0.00453  | 0.034628 |
| NGLY1    | 2.493202389 | 0        | 0.013822 |
| NKTR     | 2.292624371 | 0.00012  | 0.005105 |
| NLRC3    | 2.061936638 | 0.00107  | 0.001748 |
| NLRP2    | 2.099433367 | 0.00073  | 0.003567 |
| NMT2     | 2.295804828 | 2.00E-04 | 0.00098  |
| NOP14    | 2.775985438 | 0.00703  | 0.000699 |
| NOP56    | 2.291035796 | 0.00436  | 0.029696 |
| NOXA1    | 2.118436669 | 0.00116  | 0.007526 |
| NPEPL1   | 2.674000991 | 1.00E-05 | 0.042314 |
| NPHP3    | 2.905930099 | 0.00035  | 0.000874 |
| NPIP     | 3.116658319 | 5.00E-05 | 0.000383 |
| NR1D2    | 2.899893666 | 0.00046  | 0.000809 |
| NR2C1    | 2.613530508 | 0.00354  | 0.000834 |
| NR4A2    | 2.428389769 | 2.00E-05 | 0.010377 |
| NR4A3    | 2.284692494 | 0.00024  | 0.026041 |
| NRBP2    | 2.403272099 | 0.00015  | 0.006228 |
| NSL1     | 2.465704651 | 0.00236  | 0.049764 |
| NSMCE4A  | 2.112571251 | 0.00019  | 0.010067 |
| NSUN5B   | 2.475980582 | 0.00413  | 0.011254 |
| NSUN5C   | 3.173335373 | 0.00114  | 0.004771 |
| NUBPL    | 2.51925996  | 0.00037  | 0.011608 |
| NUCKS1   | 2.279946545 | 0.00124  | 0.000664 |
| NUDT13   | 2.932233514 | 8.00E-05 | 0.005902 |
| NUDT21   | 2.300583787 | 0.00015  | 0.007103 |
| NUFIP2   | 2.720741705 | 2.00E-05 | 0.025093 |
| NUP35    | 2.145033234 | 9.00E-04 | 0.033386 |
| OCIAD1   | 3.202059243 | 0.00578  | 0.000663 |
| OCIAD2   | 3.1777376   | 0.00757  | 0.032093 |
| OFD1     | 2.099433367 | 2.00E-05 | 0.000284 |
| OGT      | 2.770218936 | 0.00178  | 0.000403 |
| ORAOV1   | 2.985556767 | 0.00229  | 0.014006 |
| OTUD1    | 2.355445579 | 0.00072  | 0.043554 |
| OVGP1    | 2.318191904 | 0.00013  | 0.025824 |
| OXNAD1   | 2.62988552  | 0.00011  | 0.010245 |
| P2RY10   | 2.881859498 | 0.00126  | 0.047636 |
| P4HTM    | 2.278366754 | 0.00035  | 0.004138 |

|          |             |          |          |
|----------|-------------|----------|----------|
| PABPC1   | 3.590040203 | 6.00E-04 | 0.01187  |
| PABPC1L  | 2.522754818 | 0.00199  | 0.017236 |
| PAK2     | 2.624422509 | 0        | 0.026613 |
| PAN2     | 3.680750602 | 6.00E-05 | 0.002073 |
| PARP15   | 2.70007597  | 0.00388  | 0.000968 |
| PBX4     | 3.535710124 | 0        | 0.002242 |
| PCBD2    | 2.581124981 | 0.00011  | 0.014864 |
| PCNT     | 2.294214048 | 0.00333  | 0.00321  |
| PDE3B    | 2.347296357 | 8.00E-05 | 0.012604 |
| PDE4B    | 2.659214216 | 1.00E-05 | 0.005597 |
| PDE7A    | 2.15248025  | 2.00E-05 | 0.00759  |
| PFAAP5   | 2.174976782 | 0.00598  | 0.003339 |
| PHACTR3  | 2.942413492 | 0.00341  | 0.024491 |
| PHAX     | 2.286276671 | 0.00192  | 0.022844 |
| PHC3     | 3.244508622 | 0.00721  | 0.007027 |
| PHF14    | 2.073402202 | 0.00094  | 0.011959 |
| PHF2     | 3.20427951  | 0.0038   | 0.000382 |
| PHF5A    | 2.143546925 | 2.00E-05 | 0.035339 |
| PIK3CA   | 2.194663875 | 0.0056   | 0.014179 |
| PIK3IP1  | 2.046274939 | 0.00102  | 0.007    |
| PILRB    | 2.084931522 | 0.00213  | 0.010291 |
| PION     | 2.602683711 | 0.00314  | 0.000249 |
| PIP3-E   | 2.193143177 | 1.00E-05 | 0.047706 |
| PLA2G4B  | 2.261061134 | 0.00263  | 0.024742 |
| PLCG1    | 2.256364275 | 0.00159  | 0.017143 |
| PLCH2    | 2.515769944 | 0.00036  | 0.002348 |
| PLEKHA1  | 2.070529848 | 5.00E-05 | 1.50E-05 |
| PLEKHG4  | 2.237674202 | 0.00135  | 0.000172 |
| PLXDC1   | 2.381713699 | 1.00E-05 | 0.000528 |
| PMAIP1   | 2.45206972  | 0.00076  | 0.005816 |
| PMS2L3   | 2.90391656  | 6.00E-05 | 0.03225  |
| PMS2L5   | 2.398279828 | 0        | 0.004423 |
| PNMA3    | 2.348923942 | 9.00E-05 | 0.044464 |
| PNN      | 2.200757219 | 8.00E-05 | 0.006204 |
| PNPT1    | 2.005552872 | 4.00E-05 | 0.0415   |
| POFUT2   | 2.083486858 | 0.00051  | 0.032798 |
| POLR2J2  | 2.411615655 | 0.00107  | 0.000856 |
| PPIG     | 2.019502595 | 3.00E-05 | 0.01066  |
| PPM1K    | 3.494291584 | 0.00195  | 0.001557 |
| PPOX     | 3.668016173 | 0.00036  | 0.019428 |
| PPP1R2P9 | 2.080600533 | 0        | 0.010585 |

|          |             |          |          |
|----------|-------------|----------|----------|
| PPP1R3E  | 3.160165247 | 0        | 0.016255 |
| PPP2CB   | 2.67585511  | 0.00518  | 0.016325 |
| PPP3CC   | 2.097978655 | 0.00089  | 0.004831 |
| PPTC7    | 2.50185816  | 0        | 0.049313 |
| PRKRA    | 2.134650676 | 0        | 1.50E-05 |
| PRKRIP1  | 3.175535724 | 0.00054  | 0.002453 |
| PRMT10   | 2.993845974 | 0.00486  | 8.10E-05 |
| PRMT2    | 2.909961367 | 0.00054  | 0.035821 |
| PRO0628  | 2.42670712  | 0        | 0.031689 |
| PRPF3    | 2.077718207 | 0.00735  | 0.00614  |
| PRPF4B   | 3.494291584 | 3.00E-04 | 0.03137  |
| PRPH2    | 3.650261954 | 0.00041  | 0.020055 |
| PSEN1    | 3.340351678 | 1.00E-05 | 0.001761 |
| PSMA1    | 3.312682645 | 0.00523  | 0.001664 |
| PSMA7    | 3.319578342 | 5.00E-05 | 0.006286 |
| PTAR1    | 2.517514347 | 1.00E-05 | 0.027139 |
| PTBP2    | 2.526254524 | 0.00153  | 0.014362 |
| PTGDR    | 3.06523992  | 0.00063  | 0.002621 |
| PTGS2    | 2.692600139 | 0        | 9.00E-06 |
| PTS      | 2.254800824 | 0.00327  | 0.004941 |
| PVT1     | 3.592529492 | 8.00E-05 | 0.002242 |
| QSOX2    | 2.286276671 | 0.00674  | 0.017659 |
| RAB24    | 2.033549347 | 0        | 0.00249  |
| RAB3IP   | 2.196185628 | 0.00269  | 0.019294 |
| RAB40B   | 2.29739671  | 0.0051   | 0.000166 |
| RABGGTB  | 2.261061134 | 0.00397  | 0.010293 |
| RABL2A   | 2.07915887  | 0.00199  | 0.013951 |
| RABL2B   | 2.893869772 | 0.00151  | 0.017019 |
| RAD21    | 2.651851521 | 0.0056   | 0.00191  |
| RALGAPA1 | 2.522754818 | 0.00239  | 0.014868 |
| RASA2    | 2.396618043 | 0.00317  | 0.013446 |
| RASGRP1  | 2.199232299 | 0.00203  | 0.018564 |
| RASSF1   | 2.196185628 | 2.00E-04 | 0.013553 |
| RASSF5   | 2.597277205 | 0.00423  | 0.024128 |
| RBBP6    | 2.64634288  | 9.00E-05 | 0.018637 |
| RBM12    | 2.403272099 | 0.00402  | 0.001434 |
| RBM25    | 2.696335463 | 0.00224  | 0.003236 |
| RBM26    | 2.508804409 | 1.00E-05 | 0.016977 |
| RBM33    | 3.010493495 | 0.00649  | 0.000198 |
| RBM6     | 2.205338326 | 0.00186  | 0.024813 |
| RECQL    | 2.074839873 | 0.00266  | 0.010191 |



|          |             |          |          |
|----------|-------------|----------|----------|
| REV1     | 2.940374673 | 0.00261  | 0.016606 |
| RG9MTD3  | 2.02791896  | 0.0034   | 0.025259 |
| RGS1     | 2.067661472 | 0.00052  | 0.000329 |
| RGS17    | 2.339175328 | 0.00013  | 0.001522 |
| RN7SK    | 3.088700532 | 0.0036   | 0.000597 |
| RNASEH2C | 2.692600139 | 0        | 2.40E-05 |
| RNASEN   | 2.114036081 | 0.00264  | 0.000423 |
| RNF125   | 2.383365149 | 0.0054   | 0.000324 |
| RNF126   | 3.462946262 | 6.00E-05 | 0.029453 |
| RNF144   | 2.507066041 | 1.00E-05 | 0.005816 |
| RNF144A  | 2.196185628 | 0.00191  | 0.006679 |
| RNF165   | 2.103803558 | 0.00038  | 0.034819 |
| RNF216   | 3.405814831 | 0.00012  | 0.000175 |
| RNU11    | 2.932233514 | 0.00645  | 0.047312 |
| RNU12    | 2.885857374 | 0.00225  | 0.001883 |
| RNU1-3   | 3.331103084 | 0.00461  | 0.009651 |
| RNU1-5   | 2.394957409 | 0.00123  | 0.009533 |
| RNU1A3   | 3.101572825 | 0.00013  | 0.002311 |
| RNU1F1   | 2.993845974 | 0.00526  | 0.019454 |
| RNU1G2   | 2.406606052 | 0.00606  | 7.30E-05 |
| RNU4-1   | 2.020902893 | 5.00E-05 | 0.006321 |
| RNU4-2   | 3.018851937 | 0        | 0.00042  |
| RNU4ATAC | 2.303775285 | 0.00075  | 0.007555 |
| RNU5A    | 2.608101471 | 0.00026  | 0.023353 |
| RORA     | 2.608101471 | 0.00618  | 0.01478  |
| RPL13    | 2.319799309 | 8.00E-04 | 0.012276 |
| RPL14    | 2.074839873 | 0        | 0.000681 |
| RPL37    | 2.040609318 | 6.00E-05 | 0.000146 |
| RPL5     | 2.167451934 | 0.00359  | 0.000759 |
| RPL7     | 2.830388321 | 0.00467  | 0.000471 |
| RPPH1    | 2.15546629  | 3.00E-05 | 0.001293 |
| RPS27    | 2.674000991 | 0.00013  | 0.038448 |
| RPS28    | 2.105262309 | 0        | 0.044019 |
| RPS6KB1  | 2.366902044 | 6.00E-04 | 0.021826 |
| RRAGB    | 2.15248025  | 0.00251  | 0.001346 |
| RRAS2    | 3.228804298 | 0.0046   | 0.011318 |
| RTTN     | 2.64634288  | 0        | 0.000405 |
| RYK      | 3.09298535  | 0.00081  | 0.009193 |
| SAMD3    | 2.174976782 | 0.00038  | 0.014691 |
| SBDS     | 2.581124981 | 0        | 0.000681 |
| SBDSP    | 2.659214216 | 0.00023  | 0.014135 |

|          |             |          |          |
|----------|-------------|----------|----------|
| SCNN1D   | 2.934266688 | 0.00123  | 0.011698 |
| SDHAP2   | 2.865923301 | 0        | 0.021652 |
| SEC24B   | 2.054802879 | 0.00029  | 0.027784 |
| SEC31B   | 2.039195366 | 0.00039  | 0.021069 |
| SECISBP2 | 2.565073206 | 0.00091  | 0.016694 |
| SERF1B   | 2.440201021 | 0.00345  | 0.0063   |
| SF1      | 3.069492192 | 0.00735  | 0.001119 |
| SFRS13A  | 2.165950091 | 3.00E-04 | 0.002311 |
| SFRS14   | 2.01670491  | 4.00E-04 | 0.006645 |
| SFRS16   | 3.501565319 | 7.00E-05 | 0.000261 |
| SFRS17A  | 2.670296607 | 0.00019  | 0.009533 |
| SFRS18   | 2.070529848 | 0        | 0.000369 |
| SFRS5    | 3.47737824  | 0.00404  | 0.000204 |
| SGK      | 2.45206972  | 0.00616  | 0.04212  |
| SGK1     | 2.440201021 | 0.00014  | 0.005102 |
| SGSM2    | 2.477697396 | 0.00774  | 0.044821 |
| SH3KBP1  | 3.056753042 | 0.00065  | 0.018637 |
| SH3YL1   | 2.143546925 | 4.00E-05 | 0.044821 |
| SIK1     | 2.419988178 | 0.00169  | 0.006966 |
| SKP1     | 2.167451934 | 0.00274  | 0.004138 |
| SLC25A24 | 2.793357065 | 0.00741  | 0.037902 |
| SLC25A36 | 2.076278541 | 0.00326  | 0.001559 |
| SLC26A11 | 2.975227525 | 4.00E-05 | 0.046876 |
| SLC29A2  | 2.540301965 | 0        | 0.013446 |
| SLC2A4RG | 3.513721873 | 2.00E-05 | 0.000449 |
| SLC35A3  | 2.254800824 | 0.00589  | 0.004682 |
| SLC35E1  | 2.72829567  | 0.00193  | 0.004012 |
| SLC7A6   | 3.470154749 | 0.00125  | 0.000874 |
| SLK      | 3.035638506 | 0.00023  | 5.80E-05 |
| SLTM     | 3.340351678 | 1.00E-05 | 0.001559 |
| SMA4     | 2.635359903 | 0.00346  | 0.003529 |
| SNHG7    | 2.543826013 | 0.00065  | 0.006335 |
| SNORA24  | 3.25577274  | 0.00101  | 0.024768 |
| SNORA25  | 2.635359903 | 0.00326  | 0.021563 |
| SNORA28  | 2.659214216 | 7.00E-05 | 0.001639 |
| SNORA3   | 2.997999204 | 0.00614  | 0.000369 |
| SNORA33  | 2.883857743 | 0.00197  | 0.011698 |
| SNORA41  | 2.337554497 | 0.00035  | 0.001033 |
| SNORA45  | 3.041957506 | 2.00E-04 | 5.80E-05 |
| SNORA57  | 3.427127819 | 0.00217  | 0.000239 |
| SNORA6   | 2.64634288  | 0.00096  | 4.00E-05 |

|          |             |          |          |
|----------|-------------|----------|----------|
| SNORA61  | 2.749177391 | 0.00127  | 0.008787 |
| SNORA62  | 2.039195366 | 0.00386  | 0.002711 |
| SNORA64  | 2.494931144 | 0.00139  | 0.009684 |
| SNORA67  | 3.555370725 | 3.00E-04 | 0.000771 |
| SNORA70  | 2.371828999 | 0.00011  | 0.02668  |
| SNORD10  | 2.060507907 | 0.00785  | 0.014128 |
| SNORD100 | 2.431758566 | 0.00282  | 0.000515 |
| SNORD104 | 2.542063379 | 2.00E-05 | 0.024129 |
| SNORD12C | 2.019502595 | 0.00523  | 0.011376 |
| SNORD14A | 2.046274939 | 4.00E-05 | 0.013227 |
| SNORD21  | 2.431758566 | 0        | 0.004469 |
| SNORD30  | 2.0139111   | 7.00E-05 | 0.000322 |
| SNORD31  | 2.498392251 | 0.00076  | 0.009324 |
| SNORD32A | 3.237768866 | 0.00053  | 0.003952 |
| SNORD33  | 2.108182847 | 0.00641  | 0.024048 |
| SNORD34  | 2.182527754 | 6.00E-05 | 0.000309 |
| SNORD35A | 3.153600696 | 0        | 0.002073 |
| SNORD35B | 2.846126922 | 0.00045  | 0.020034 |
| SNORD36A | 3.010493495 | 0.001    | 0.015748 |
| SNORD36C | 3.210949555 | 0        | 0.000239 |
| SNORD38A | 2.200757219 | 0.00622  | 0.025018 |
| SNORD3A  | 3.075881663 | 0        | 0.009193 |
| SNORD3C  | 2.795293944 | 0.00552  | 1.00E-06 |
| SNORD4A  | 2.431758566 | 0.00123  | 0.001791 |
| SNORD83B | 3.535710124 | 3.00E-05 | 0.000269 |
| SNORD99  | 2.323017464 | 0.00214  | 0.001075 |
| SNRP70   | 2.705696462 | 7.00E-05 | 0.011504 |
| SNRPA1   | 3.120981921 | 0.0011   | 0.027894 |
| SNX1     | 3.138336392 | 0.00031  | 3.10E-05 |
| SNX25    | 2.108182847 | 0.00311  | 0.028715 |
| SNX26    | 2.345669898 | 0.00013  | 0.001934 |
| SOCS2    | 2.662903226 | 0        | 0.001203 |
| SON      | 2.674000991 | 0.00018  | 0.020119 |
| SP110    | 2.245442844 | 3.00E-05 | 0.003106 |
| SP140L   | 2.064797071 | 0.00384  | 0.019821 |
| SP3      | 2.814736751 | 0.00175  | 0.012105 |
| SPRY1    | 2.203810232 | 4.00E-05 | 0.009178 |
| SRP54    | 2.659214216 | 0.00742  | 0        |
| SRRM1L   | 2.948538435 | 0.00035  | 0.002154 |
| SSR2     | 2.234574276 | 0.00786  | 0.031717 |
| STAG3L1  | 3.298934194 | 0.00023  | 0.04704  |

|          |             |          |          |
|----------|-------------|----------|----------|
| STAG3L2  | 3.147049781 | 0.0028   | 0.002569 |
| STAG3L3  | 2.801112642 | 9.00E-04 | 0.029785 |
| STAT4    | 2.677710514 | 0.00271  | 0.019361 |
| STAU1    | 2.505328877 | 0.00135  | 0.010662 |
| STIM2    | 2.121375483 | 3.00E-05 | 0.001864 |
| STK36    | 2.869899069 | 0.00062  | 0.007027 |
| STX2     | 2.722628233 | 0.00082  | 0.008546 |
| SUPT3H   | 2.158456473 | 0.00042  | 0.004095 |
| SUV420H1 | 2.582914701 | 0.00244  | 5.50E-05 |
| SVIL     | 2.208397694 | 0.00097  | 0.017407 |
| SYTL2    | 3.417638964 | 7.00E-05 | 0.012631 |
| TAF1C    | 2.549121255 | 0.00705  | 0.004232 |
| TAF1L    | 2.383365149 | 0        | 0.000146 |
| TAF9L    | 3.365917929 | 0.00657  | 0.01613  |
| TAGAP    | 3.562771602 | 0.00345  | 0.000623 |
| TARBP1   | 2.26891097  | 0.00021  | 0.033455 |
| TARDBP   | 3.627561316 | 0.00031  | 0.005097 |
| TBC1D3B  | 2.196185628 | 0.00014  | 0.010232 |
| TBC1D3I  | 2.208397694 | 0.0018   | 0.006447 |
| TBC1D4   | 2.507066041 | 5.00E-04 | 0.000986 |
| TDRD1    | 2.440201021 | 0.00015  | 0.014707 |
| TF       | 2.733974904 | 0.00773  | 0.01296  |
| TGFBR2   | 2.205338326 | 5.00E-05 | 0.017975 |
| THOC4    | 2.885857374 | 0        | 0.022158 |
| THUMPD1  | 2.690734417 | 0.00015  | 0.009574 |
| TIA1     | 2.995921869 | 2.00E-05 | 0.003531 |
| TMEM137  | 3.273876726 | 0.00019  | 0.000647 |
| TMEM14B  | 3.044066762 | 0.00234  | 0.006441 |
| TMEM42   | 2.613530508 | 0.00079  | 0.000202 |
| TMEM50B  | 2.267338826 | 4.00E-05 | 9.70E-05 |
| TNFRSF25 | 3.398739997 | 0.00148  | 0.023565 |
| TOP3B    | 3.358925972 | 0.00411  | 0.003623 |
| TPM2     | 2.097978655 | 0        | 0.005042 |
| TRA2A    | 2.011121161 | 0.0038   | 0.008447 |
| TRADD    | 2.051956291 | 0        | 0.000318 |
| TRIM65   | 2.347296357 | 2.00E-05 | 0.000112 |
| TRMT11   | 2.751083636 | 0.00706  | 0.000274 |
| TRMT2B   | 2.446976082 | 0        | 0.014899 |
| TSC1     | 2.668446339 | 0.00131  | 0.002177 |
| TSC22D2  | 3.112340706 | 0.00176  | 0.003129 |
| TSC22D3  | 3.324183446 | 2.00E-05 | 0.017216 |

|         |             |          |          |
|---------|-------------|----------|----------|
| TSPAN32 | 3.052518418 | 0.00388  | 0.030934 |
| TSPYL2  | 2.848100391 | 1.00E-05 | 0.000589 |
| TSTD1   | 2.087823855 | 0        | 0.002893 |
| TTC13   | 2.679567205 | 0.00202  | 0.008233 |
| TTC14   | 3.314979618 | 0.00492  | 0.000305 |
| TTC16   | 2.032140286 | 0.00126  | 0.001844 |
| TTC18   | 2.286276671 | 0.00177  | 2.40E-05 |
| TTC32   | 2.848100391 | 0        | 5.20E-05 |
| TTLL3   | 2.905930099 | 3.00E-04 | 0.006009 |
| TUBG2   | 3.326488393 | 0        | 0.000483 |
| TUBGCP6 | 2.173469725 | 0.00433  | 0.0245   |
| TXK     | 2.323017464 | 0.00033  | 0.000148 |
| TYW3    | 2.150988781 | 0.00018  | 0.000157 |
| U2AFIL2 | 2.50185816  | 2.00E-05 | 0.005711 |
| UBA6    | 2.363623094 | 0.00136  | 0.006645 |
| UBE1C   | 2.194663875 | 0        | 0.002998 |
| UBE2A   | 2.869899069 | 0.00019  | 0.000565 |
| UHRF2   | 2.542063379 | 0.00098  | 0.000202 |
| UNC119  | 3.662934746 | 0.00029  | 0.037583 |
| UNC84A  | 2.73966596  | 0.00717  | 2.00E-06 |
| UPF2    | 2.73966596  | 1.00E-05 | 0.012856 |
| UPF3A   | 3.116658319 | 0.00034  | 0.016346 |
| USP1    | 2.057653416 | 3.30E-04 | 0.002844 |
| USP12   | 2.670296607 | 0.00036  | 0.005032 |
| USP33   | 2.270484204 | 0.00483  | 0.003563 |
| USP36   | 3.249009585 | 0.00031  | 0.016823 |
| USP4    | 2.789487333 | 0.00382  | 0.041301 |
| USPL1   | 2.419988178 | 0.00016  | 0.048382 |
| VAMP1   | 3.439025945 | 0.00019  | 0.001699 |
| VAMP4   | 2.127265346 | 0.00512  | 0.004095 |
| VHL     | 2.474264957 | 0.00087  | 0.001291 |
| VNN3    | 2.540301965 | 0.00235  | 0.000284 |
| WAC     | 3.278418431 | 0.00052  | 0.001676 |
| WASH2P  | 2.040609318 | 0.00304  | 0.013854 |
| WDR19   | 2.168954818 | 0.00756  | 0.008429 |
| WDR74   | 3.099423724 | 0.00078  | 0.03244  |
| WHAMM   | 3.276146791 | 0.00126  | 0.007949 |
| WTAP    | 2.273633946 | 0.00724  | 0.000405 |
| YRDC    | 3.622535932 | 0.00188  | 0.018339 |
| ZAP70   | 2.298989696 | 0        | 5.10E-05 |
| ZBED5   | 3.319578342 | 8.00E-05 | 0.0312   |

|         |             |          |          |
|---------|-------------|----------|----------|
| ZBTB25  | 3.073750363 | 1.00E-05 | 0.000517 |
| ZBTB44  | 2.488023307 | 0        | 0.009533 |
| ZC3H11A | 2.531513188 | 0.00345  | 0.006349 |
| ZC3H8   | 3.164549205 | 0.00417  | 0.001861 |
| ZDHHC11 | 2.319799309 | 0.00483  | 0.008297 |
| ZDHHC17 | 3.431882122 | 0.00455  | 0.002311 |
| ZFAND2A | 2.006943497 | 3.00E-05 | 0.025999 |
| ZFC3H1  | 2.0907202   | 3.00E-05 | 0.013332 |
| ZFP36L1 | 2.139094176 | 5.00E-05 | 0.002788 |
| ZFP90   | 2.430073584 | 3.00E-05 | 0.001178 |
| ZMIZ2   | 2.907945035 | 1.00E-05 | 3.40E-05 |
| ZNF100  | 3.151415544 | 6.00E-04 | 0.001251 |
| ZNF154  | 3.528365461 | 0.00305  | 0.014029 |
| ZNF248  | 2.197708435 | 0        | 0.018589 |
| ZNF251  | 2.394957409 | 0.00021  | 0.00573  |
| ZNF264  | 3.075881663 | 0.00364  | 0.000239 |
| ZNF266  | 2.0363704   | 0.00052  | 0.008332 |
| ZNF276  | 2.848100391 | 0.00056  | 0.029761 |
| ZNF292  | 2.848100391 | 0.00069  | 2.00E-05 |
| ZNF394  | 2.920064021 | 2.00E-04 | 0.000255 |
| ZNF483  | 2.932233514 | 0.00331  | 2.70E-05 |
| ZNF512B | 2.983488053 | 7.00E-05 | 0.047112 |
| ZNF514  | 3.458148925 | 0        | 0.000204 |
| ZNF525  | 3.58258268  | 0        | 0.000598 |
| ZNF548  | 2.037782393 | 0.00071  | 0.004301 |
| ZNF558  | 2.034959384 | 1.00E-04 | 0.001824 |
| ZNF589  | 2.049113646 | 3.00E-05 | 0.000925 |
| ZNF669  | 2.324628215 | 0.00053  | 0.01195  |
| ZNF673  | 2.355445579 | 0.00674  | 0.015523 |
| ZNF682  | 2.705696462 | 1.00E-05 | 0.002937 |
| ZNF688  | 2.875873066 | 0.00144  | 0.039265 |
| ZNF692  | 3.131817185 | 0.00022  | 0.000158 |
| ZNF75A  | 3.226567037 | 0.00197  | 0.000269 |
| ZNF767  | 3.285242803 | 0.00396  | 0.000771 |
| ZNF786  | 3.292081381 | 0.00353  | 0.04634  |
| ZNF80   | 3.294364069 | 0        | 0.018494 |
| ZNF83   | 3.324183446 | 2.00E-05 | 0.03     |
| ZRANB1  | 3.547985221 | 0.00036  | 0.010031 |
| ZRANB2  | 3.557835974 | 0        | 0.000128 |
| ZSWIM7  | 3.680750602 | 0        | 0.005648 |

**Supplementary Table S3: Reorganized GO categories with genes upregulated in *P. falciparum* infection (F) as compared to *P. vivax* (V) infection**

| <i>P. falciparum</i> infection (F) versus <i>P. vivax</i> infection (V) [Genes upregulated] |                                                                                                                                                                                                                                                                                                                                  |
|---------------------------------------------------------------------------------------------|----------------------------------------------------------------------------------------------------------------------------------------------------------------------------------------------------------------------------------------------------------------------------------------------------------------------------------|
| Groups (curated manually)                                                                   | GO categories included                                                                                                                                                                                                                                                                                                           |
| Immune response and inflammation                                                            | Inflammatory response<br>Innate immune response<br>T cell receptor signaling pathway<br>Interferon-gamma-mediated signaling pathway<br>TGF $\beta$ receptor signaling pathway<br>Toll-like receptor signaling pathway<br>Immune response<br>Cellular defense response<br>Regulation of cytokine secretion<br>Leukocyte migration |
| Protein assembly and modification                                                           | Cellular protein metabolic process<br>Regulation of protein localization                                                                                                                                                                                                                                                         |
| Chromatin assembly                                                                          | Nucleosome assembly<br>Chromatin silencing                                                                                                                                                                                                                                                                                       |
| Cell signaling                                                                              | Positive regulation of NF-kappaB signaling<br>Chemokine-mediated signaling pathway<br>Fc-epsilon receptor signaling pathway<br>JAK-STAT cascade<br>Neuron apoptotic process<br>Notch signaling pathway                                                                                                                           |
| Cell adhesion and motility                                                                  | Chemotaxis<br>Cell-cell adhesion<br>Movement of cell or subcellular component<br>Cell chemotaxis<br>Cell adhesion                                                                                                                                                                                                                |
| Oxidative stress                                                                            | Response to oxidative stress<br>Glutathione metabolic process<br>Oxidation-reduction process<br>Cellular oxidant detoxification                                                                                                                                                                                                  |
| Regulation of gene expression                                                               | Negative regulation of gene expression<br>Negative regulation of transcription<br>Regulation of gene expression, epigenetic                                                                                                                                                                                                      |
| Apoptosis                                                                                   | Positive regulation of apoptotic process<br>Apoptotic mitochondrial changes                                                                                                                                                                                                                                                      |
| Blood coagulation                                                                           | Platelet activation                                                                                                                                                                                                                                                                                                              |
| Miscellaneous function                                                                      | Regulation of cell proliferation<br>Regulation of mRNA stability<br>Positive regulation of cell proliferation<br>Positive regulation of cytosolic calcium ion                                                                                                                                                                    |

|  |                                                                                                                                                                                                             |
|--|-------------------------------------------------------------------------------------------------------------------------------------------------------------------------------------------------------------|
|  | concentration<br>Angiogenesis involved in wound healing<br>Microglial cell activation<br>Negative regulation of DNA damage response<br>Extracellular matrix organization<br>Actin cytoskeleton organization |
|--|-------------------------------------------------------------------------------------------------------------------------------------------------------------------------------------------------------------|



**Supplementary Table S4: Reorganized GO categories with genes upregulated in *P. falciparum* infection (F) as compared to GSE45919 dataset (N)**

| <b><i>P. falciparum</i> infection (F) versus GSE45919 data of infection naïve US individuals (N)[Genes upregulated]</b> |                                                                                                                                                                                                                                                                                                                                                                                                                                                                                       |
|-------------------------------------------------------------------------------------------------------------------------|---------------------------------------------------------------------------------------------------------------------------------------------------------------------------------------------------------------------------------------------------------------------------------------------------------------------------------------------------------------------------------------------------------------------------------------------------------------------------------------|
| <b>Groups (curated manually)</b>                                                                                        | <b>GO categories included</b>                                                                                                                                                                                                                                                                                                                                                                                                                                                         |
| Immune response and inflammation                                                                                        | Inflammatory response<br>Innate immune response<br>Interferon-gamma-mediated signaling<br>Immune response<br>T cell proliferation<br>Adaptive immune response<br>Regulation of INF- $\gamma$ production<br>Toll-like receptor signaling pathway<br>Regulation of TGF $\beta$ signaling pathway<br>B cell homeostasis<br>Regulation of NF-KB import into nucleus<br>Regulation of inflammatory response<br>Regulation of chemokine production<br>Cellular response to interferon-alpha |
| Protein assembly and modification                                                                                       | Protein targeting to plasma membrane<br>Regulation of protein stability<br>Protein destabilization<br>STAT protein import into nucleus                                                                                                                                                                                                                                                                                                                                                |
| Chromatin assembly                                                                                                      | Nucleosome assembly                                                                                                                                                                                                                                                                                                                                                                                                                                                                   |
| Cell signaling                                                                                                          | Signal transduction<br>Integrin-mediated signaling pathway<br>Receptor protein signaling pathway<br>Regulation of MAP kinase activity<br>Cell surface receptor signaling pathway                                                                                                                                                                                                                                                                                                      |
| Cell adhesion and motility                                                                                              | Chemotaxis<br>Cell adhesion<br>Cell migration<br>Cell motility<br>Movement of cell                                                                                                                                                                                                                                                                                                                                                                                                    |
| Oxidative stress                                                                                                        | Cellular oxidant detoxification<br>Response to hydrogen peroxide                                                                                                                                                                                                                                                                                                                                                                                                                      |
| Regulation of gene expression                                                                                           | Regulation of gene expression                                                                                                                                                                                                                                                                                                                                                                                                                                                         |
| Apoptosis                                                                                                               | Apoptotic process                                                                                                                                                                                                                                                                                                                                                                                                                                                                     |
| Blood coagulation                                                                                                       | Blood coagulation<br>Platelet aggregation                                                                                                                                                                                                                                                                                                                                                                                                                                             |
| Miscellaneous function                                                                                                  | Actin filament polymerization<br>Cellular protein metabolic process<br>Actin cytoskeleton organization<br>Extracellular matrix organization                                                                                                                                                                                                                                                                                                                                           |



**Supplementary Table S5: Genotype frequencies of CD14 promoter SNPs**

| SNP<br>Type of base<br>changes | Genotype proportion (11; 12; 22)      |                                       |                                         |                           |
|--------------------------------|---------------------------------------|---------------------------------------|-----------------------------------------|---------------------------|
|                                | <i>P. falciparum</i> : all<br>(n=111) | <i>P. falciparum</i> : mild<br>(n=52) | <i>P. falciparum</i> : severe<br>(n=59) | <i>P. vivax</i><br>(n=30) |
| rs2569190<br>(G>A)             | 0.24; 0.55; 0.21                      | 0.29; 0.52; 0.19                      | 0.31; 0.47; 0.22                        | 0.24; 0.66; 0.10          |
| rs2569191<br>(G>A)             | 0.30; 0.58; 0.12                      | 0.41; 0.51; 0.08                      | 0.22; 0.63; 0.15                        | 0.27; 0.67; 0.06          |
| rs5744454<br>(A>C)             | 0.67; 0.26; 0.07                      | 0.81; 0.18; 0.01                      | 0.51; 0.37; 0.12                        | 0.66; 0.28; 0.06          |

\*1 and 2 denote major and minor alleles

**Supplementary Figure S1: a) Correlation of gene expression of technical replicates. b) Control probe expression pattern**

a)

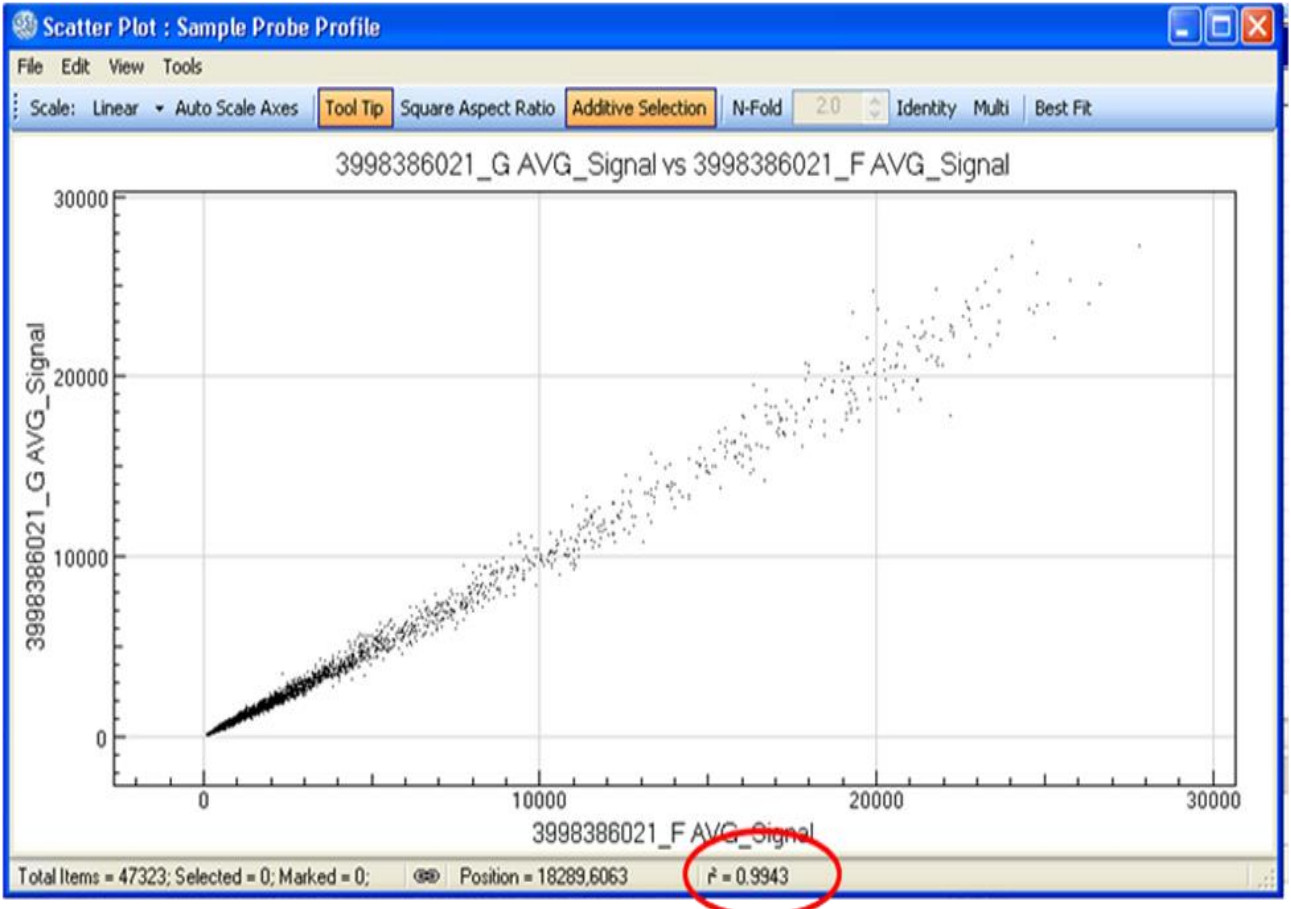

b)

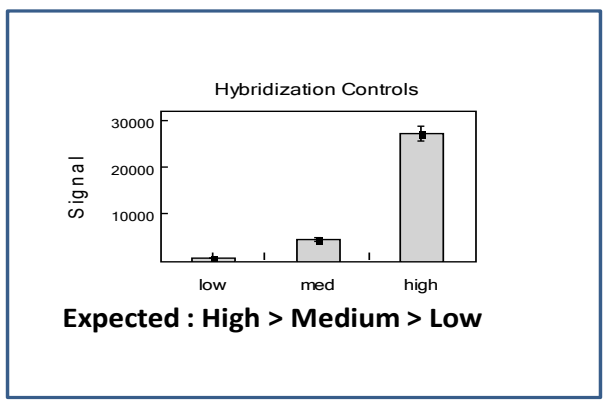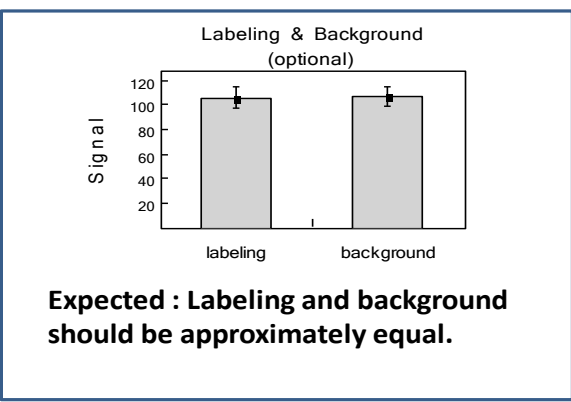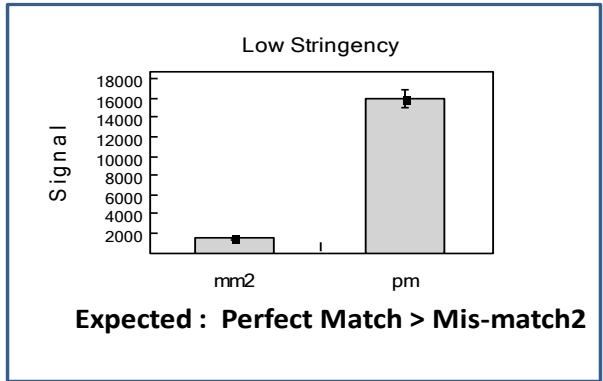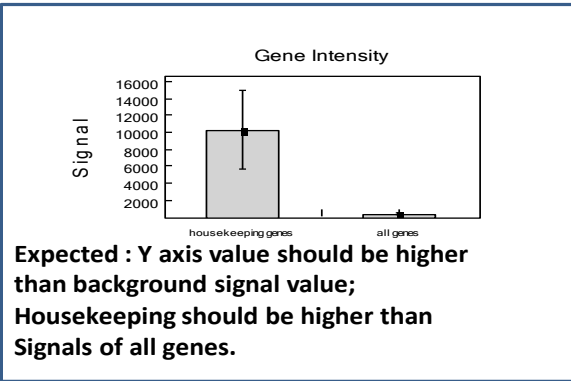

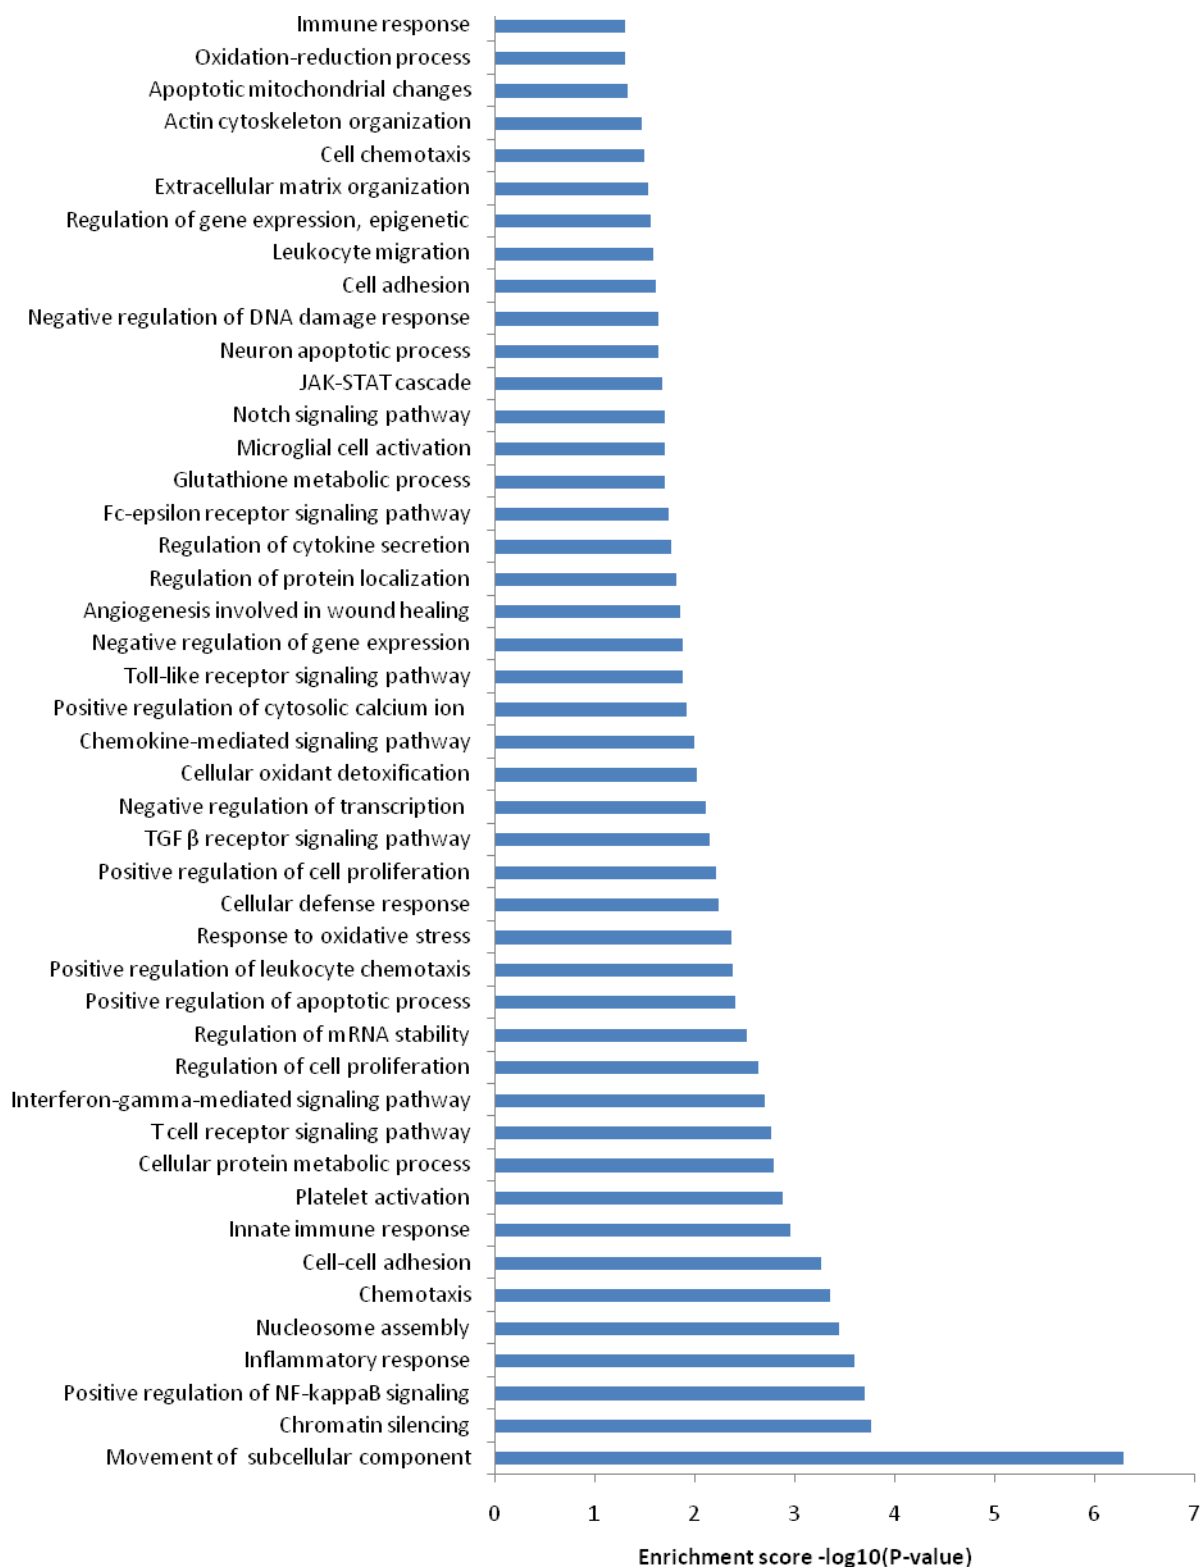

**Supplementary Figure S2: GO enriched scores versus enrichment categories of genes up regulated in *P. falciparum* compared to *P. vivax* infection.**

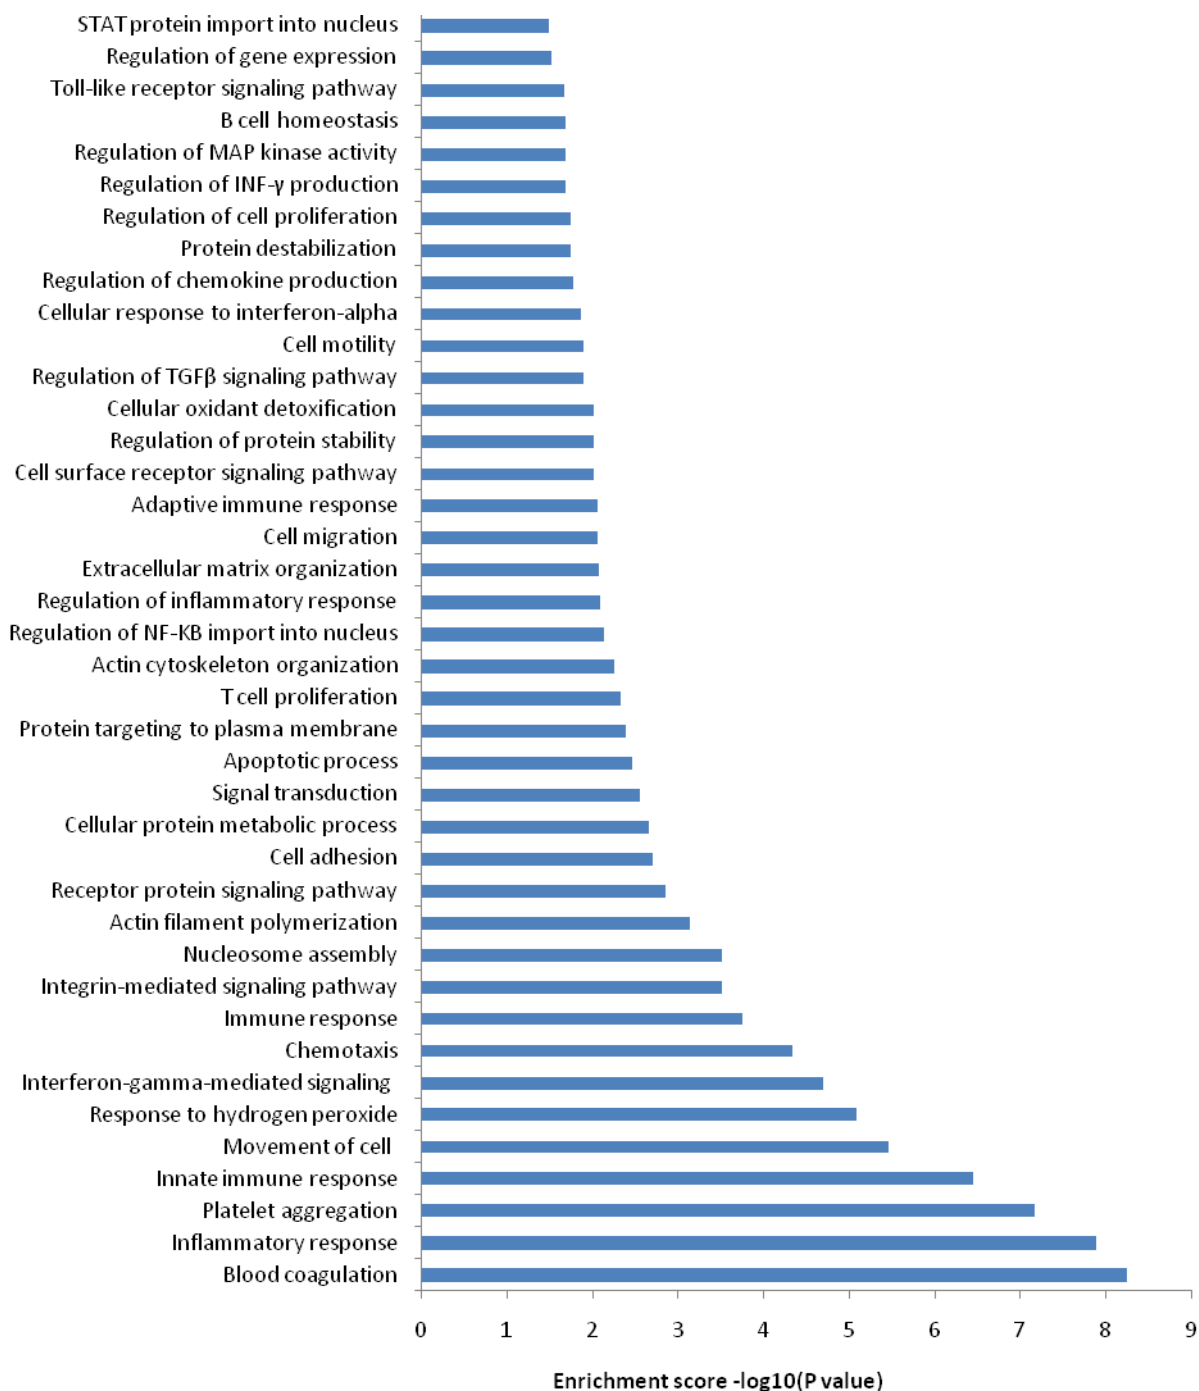

**Supplementary Figure S3: GO enriched scores versus enrichment categories of genes up regulated in *P. falciparum* (F) infection compared to infection naïve US individuals (N)**

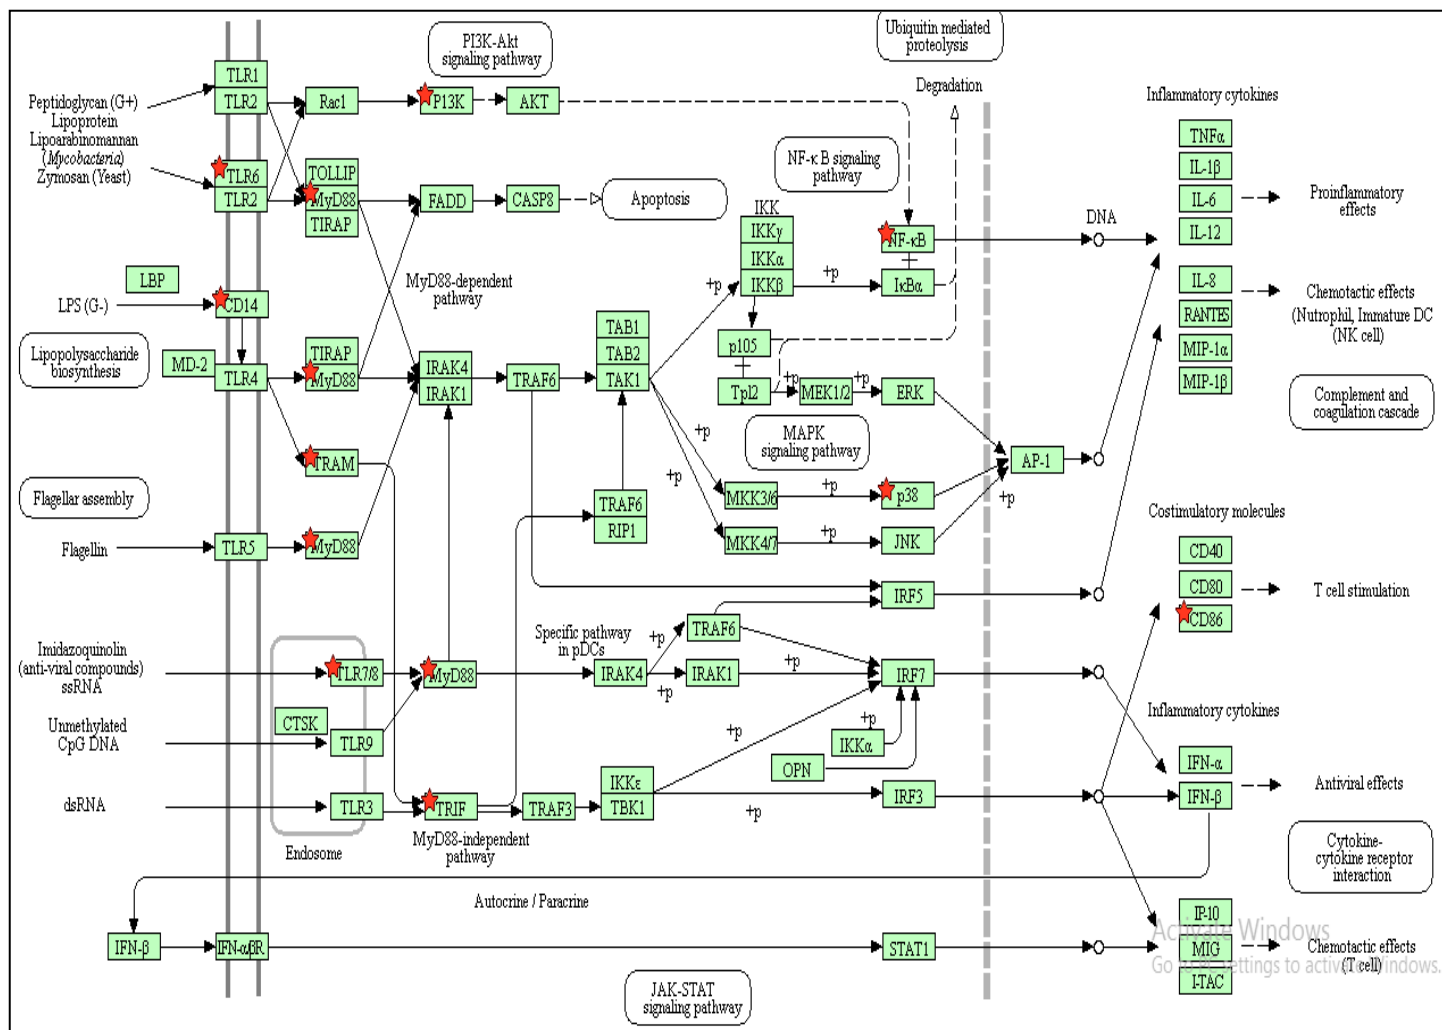

**Supplementary Figure S4: Toll Like Receptor (TLR) pathway enriched with genes (marked in red star) from microarray analysis.**

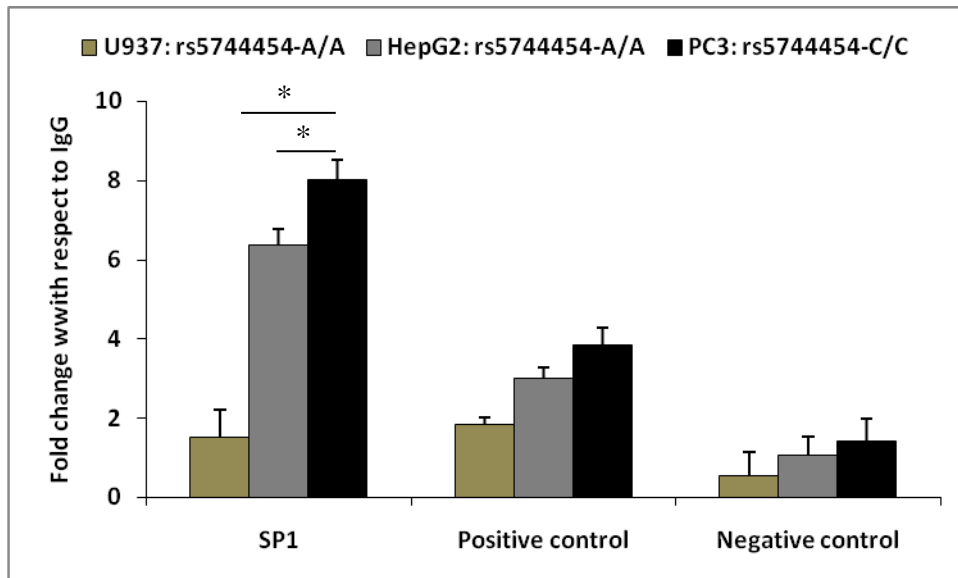

**Supplementary Figure S5: Chromatin immunoprecipitation conducted to assay the SP1 binding efficiency in CD14 promoter encompassing rs5744454 with respect to IgG as compared to a positive and a negative control primer pairs. U937 and HepG2 cell lines harboring A/A genotype show a lesser binding efficiency of SP1 than PC3 harboring C/C genotype. \* denotes P value <0.05 which is considered significant.**
